# Supplementary material for: New-generation electron-propagator methods for vertical electron detachment energies of molecular anions: benchmarks and applications to model green-fluorescent-protein chromophores
Source: Royal Society of Chemistry journal article supplement (doi:10.1039/d4cp00441h), 2024-01-01
Supplement: d4cp00441h15.xlsx [file d4cp00441h15.xlsx]

## Sheet: aDZ
PhO-	C2V	Experiment VDE	KT	D2	PS(D2)	os-D2	PS(os-D2)	nD-D2	PS(nD-D2)	os-nD-D2	PS(os-nD-D2)	Q3	PS(Q3)	Q3+	PS(Q3+)	nD-L3	PS(nD-L3)	nD-L3+A	PS(nD-L3+A)	nD-L3+B	PS(nD-L3+B)	nD-L3+C	PS(nD-L3+C)	nD-RL3	PS(nD-RL3)	NRL3	PS(NRL3)	NRL3 largest Coefficients	NRL3 largest Coefficients	NRL3 largest Coefficients	NRL3 largest Coefficients
	B1	2.26 ± 0.03	2.352	1.649	0.863	1.932	0.901	1.619	0.9	1.919	0.929	2.231	0.883	2.147	0.879272	2.154	0.921	1.937	0.923749	2.067	0.917239	2.067	0.917241	2.022	0.8969	1.972	0.862194	0.993756
	B2	3.22 ± 0.02	5.312	1.781	0.822	3.121	0.873	1.706	0.841	3.088	0.886	3.696	0.887	3.375	0.868793	3.607	0.907	3.122	0.888147	3.282	0.88875	3.238	0.888674	3.179	0.860571	3.18	0.826799	0.993028
	A2		4.732	4.04	0.863	4.302	0.899	4.014	0.896	4.29	0.924	4.415	0.873	4.344	0.870482	4.383	0.906	4.221	0.909927	4.31	0.903801	4.323	0.903815	4.186	0.829362	4.202	0.818692	0.999276
	B1		7.362	5.049	0.819	5.693	0.85	4.989	0.842	5.662	0.867	6.056	0.831	5.903	0.825924	5.988	0.855	5.719	0.851835	5.83	0.84901	5.812	0.848975	5.329	0.614571	5.426	0.598054	0.986768	0.120348
	B2		8.802	6.251	0.847	7.381	0.895	6.202	0.864	7.361	0.908	7.23	0.888	7.042	0.87781	7.236	0.906	6.951	0.895162	7.046	0.895514	7.052	0.89554	6.981	0.866939	6.967	0.390926	0.909929	0.385918	0.132045
	A1		9.197	6.474	0.844	7.685	0.895	6.418	0.863	7.664	0.908	7.61	0.884	7.401	0.874115	7.581	0.903	7.265	0.892821	7.368	0.892845	7.367	0.892844	7.325	0.872439	7.028	0.859527	0.991974	0.113777
DF-PhO-	C2V		KT	D2	PS(D2)	os-D2	PS(os-D2)	nD-D2	PS(nD-D2)	os-nD-D2	PS(os-nD-D2)	Q3	PS(Q3)	Q3+	PS(Q3+)	nD-L3	PS(nD-L3)	nD-L3+A	PS(nD-L3+A)	nD-L3+B	PS(nD-L3+B)	nD-L3+C	PS(nD-L3+C)	nD-RL3	PS(nD-RL3)	NRL3	PS(NRL3)
	B1	2.61 ± 0.03	2.872	2.118	0.865	2.43	0.903	2.085	0.904	2.416	0.931	2.655	0.883	2.572	0.879981	2.571	0.922	2.379	0.923924	2.484	0.919025	2.493	0.919004	2.447	0.899221	2.4	0.857489	0.993937	0.100554
	B2		6.076	2.404	0.821	3.785	0.872	2.328	0.839	3.752	0.885	4.351	0.885	4.027	0.86668	4.254	0.905	3.77	0.885753	3.925	0.886396	3.881	0.886314	3.813	0.857737	3.83	0.840287	0.997445
	A2		5.099	4.235	0.866	4.575	0.902	4.202	0.9	4.56	0.927	4.597	0.876	4.522	0.873809	4.557	0.91	4.416	0.91146	4.479	0.907696	4.5	0.907728	4.385	0.853141	4.393	0.821289	0.998123
	B1		8.019	5.726	0.821	6.349	0.85	5.668	0.844	6.318	0.867	6.603	0.826	6.465	0.822047	6.535	0.849	6.304	0.847828	6.394	0.84484	6.385	0.84482	5.842	0.569751	5.941	0.557136	0.987075	0.107865
	B1		9.913	7.166	0.818	7.914	0.844	7.107	0.837	7.883	0.858	8.041	0.817	7.897	0.813909	8.001	0.836	7.773	0.835098	7.854	0.832486	7.848	0.832463	7.586	0.499735	7.878	0.848291	0.98697
Syn-DM-PhO-	C2V		KT	D2	PS(D2)	os-D2	PS(os-D2)	nD-D2	PS(nD-D2)	os-nD-D2	PS(os-nD-D2)	Q3	PS(Q3)	Q3+	PS(Q3+)	nD-L3	PS(nD-L3)	nD-L3+A	PS(nD-L3+A)	nD-L3+B	PS(nD-L3+B)	nD-L3+C	PS(nD-L3+C)	nD-RL3	PS(nD-RL3)	NRL3	PS(NRL3)
	B1	2.35	2.577	1.741	0.859	2.096	0.899	1.704	0.898	2.081	0.928	2.396	0.88	2.298	0.87636	2.285	0.921	2.059	0.921441	2.184	0.916319	2.185	0.91632	2.161	0.898578	2.11	0.857814	0.992942
	A2	3.5	5.683	2.076	0.823	3.488	0.875	1.996	0.843	3.455	0.89	4.005	0.887	3.681	0.869073	3.91	0.908	3.418	0.889216	3.581	0.889881	3.538	0.889796	3.503	0.866774	3.432	0.846424	0.902174	0.421546
	B2		4.422	3.428	0.859	3.84	0.899	3.389	0.894	3.824	0.924	3.966	0.875	3.871	0.871667	3.897	0.91	3.703	0.910706	3.798	0.906812	3.809	0.906812	3.744	0.869165	3.787	0.83762	0.899034	0.415645	0.126295
	B1		7.67	5.135	0.822	5.898	0.854	5.071	0.844	5.866	0.871	6.214	0.837	6.05	0.83104	6.142	0.86	5.862	0.856014	5.974	0.853798	5.954	0.853752	5.554	0.620035	5.608	0.703007	0.875154	0.46227
	A1		7.855	4.949	0.848	6.044	0.887	4.89	0.867	6.018	0.9	6.095	0.874	5.915	0.867154	6.065	0.893	5.773	0.886411	5.881	0.885712	5.866	0.885662	5.792	0.834813	5.769	0.726823	0.947428	0.284386
	A2		8.438	4.991	0.842	6.313	0.887	4.927	0.859	6.285	0.9	6.521	0.888	6.28	0.876535	6.483	0.906	6.106	0.893358	6.239	0.893622	6.208	0.893535	6.157	0.86787	6.106	0.831076	0.975927	0.118289
	B1		9.543	6.697	0.831	7.806	0.873	6.635	0.85	7.779	0.887	7.852	0.859	7.647	0.850603	7.804	0.879	7.489	0.871089	7.595	0.870215	7.589	0.870194	7.409	0.936836	7.127	0.0865292	0.698365	0.364953	0.548447	0.154474
	B1		9.59	6.801	0.852	7.977	0.897	6.748	0.869	7.954	0.91	8.014	0.891	7.821	0.881385	8.003	0.909	7.681	0.898875	7.806	0.898844	7.787	0.898768	7.72	0.862185	7.406	0.640169	0.944279	0.209375	0.101652	0.212867
	A1		9.688	6.863	0.85	7.988	0.891	6.81	0.867	7.964	0.904	8.076	0.884	7.894	0.875445	8.061	0.901	7.749	0.893116	7.876	0.892698	7.851	0.892612	7.778	1.21363	7.718	0.822713	0.957662	0.171364	0.110875	0.117872
p-HBDI-	Cs		KT	D2	PS(D2)	os-D2	PS(os-D2)	nD-D2	PS(nD-D2)	os-nD-D2	PS(os-nD-D2)	Q3	PS(Q3)	Q3+	PS(Q3+)	nD-L3	PS(nD-L3)	nD-L3+A	PS(nD-L3+A)	nD-L3+B	PS(nD-L3+B)	nD-L3+C	PS(nD-L3+C)	nD-RL3	PS(nD-RL3)	NRL3	PS(NRL3)
	A"	2.74 ± 0.04	2.954	2.345	0.848	2.671	0.896	2.316	0.891	2.661	0.928	2.819	0.862	2.74	0.859164	2.679	0.906	2.52	0.909188	2.599	0.902754	2.614	0.902693	2.536	0.871923	2.523	0.827705	0.995786
	A'	4.3 ± 0.1	6.703	2.945	0.806	4.39	0.86	2.867	0.825	4.356	0.874	4.841	0.858	4.526	0.840956	4.754	0.878	4.278	0.860374	4.434	0.860333	4.388	0.860244	4.211	0.794213	4.216	0.516183	0.989445
	A"	4.9 ± 0.1	5.655	4.318	0.829	4.826	0.868	4.266	0.864	4.803	0.893	4.919	0.823	4.824	0.822336	4.804	0.858	4.629	0.863658	4.706	0.857192	4.71	0.857208	nc	nc	4.915	0.69175	0.996949
	A"		5.852	4.934	0.845	5.336	0.887	4.9	0.877	5.322	0.912	5.3	0.844	5.232	0.843174	5.267	0.876	5.122	0.881995	5.196	0.875069	5.207	0.875101	4.885	0.709391	5.396	0.795377	0.993268
	A'		7.821	4.415	0.822	5.769	0.875	4.336	0.843	5.736	0.89	5.868	0.854	5.619	0.844509	5.756	0.876	5.399	0.866937	5.504	0.866308	5.491	0.8663	5.385	0.816947	5.612	0.547596	0.824629	0.543408
	A"		7.685	5.52	0.826	6.278	0.866	5.455	0.853	6.248	0.886	6.327	0.832	6.188	0.828463	6.222	0.86	6.008	0.859031	6.079	0.856232	6.085	0.856247	5.964	0.599252	6.89	0.795363	0.876653	0.118801	0.454072
	A'		9.564	6.104	0.82	7.454	0.871	6.034	0.838	7.423	0.885	7.456	0.857	7.214	0.845561	7.395	0.876	7.048	0.864378	7.147	0.864166	7.139	0.864148	6.974	0.784456	7.62	0.834005	0.883926	0.450491	0.109905
	A"		9.108	6.689	0.806	7.39	0.839	6.624	0.829	7.356	0.856	7.554	0.803	7.412	0.799731	7.471	0.827	7.241	0.827377	7.325	0.823787	7.318	0.823774	5.883	1.37966	7.626	0.796441	0.878103	0.447782	0.129799
	A'		9.727	6.644	0.828	7.945	0.88	6.582	0.846	7.92	0.894	7.788	0.864	7.569	0.853624	7.753	0.883	7.441	0.87214	7.529	0.871968	7.534	0.871983	7.417	1.30788
	A"		9.968	7.299	0.816	8.172	0.854	7.23	0.839	8.138	0.872	8.276	0.818	8.136	0.814913	8.173	0.842	7.94	0.841421	8.029	0.838692	8.013	0.838679	nc	nc
DF-HBDI-	Cs		KT	D2	PS(D2)	os-D2	PS(os-D2)	nD-D2	PS(nD-D2)	os-nD-D2	PS(os-nD-D2)	Q3	PS(Q3)	Q3+	PS(Q3+)	nD-L3	PS(nD-L3)	nD-L3+A	PS(nD-L3+A)	nD-L3+B	PS(nD-L3+B)	nD-L3+C	PS(nD-L3+C)	nD-RL3	PS(nD-RL3)	NRL3	PS(NRL3)
	A"	2.98 ± 0.04	3.257	2.628	0.849	2.959	0.896	2.596	0.892	2.948	0.929	3.075	0.862	2.996	0.859289	2.929	0.907	2.785	0.909111	2.848	0.903943	2.869	0.903855	2.79	0.874018	2.779	0.828937	0.995404
	A'	4.5 ± 0.1	7.353	3.38	0.801	4.884	0.856	3.299	0.819	4.848	0.869	5.368	0.855	5.036	0.837009	5.269	0.875	4.778	0.85608	4.932	0.856249	4.884	0.856151	4.684	0.786992	4.691	0.769286	0.995895
	A"		5.981	4.62	0.83	5.143	0.868	4.567	0.864	5.12	0.894	5.187	0.823	5.092	0.822674	5.072	0.858	4.909	0.863685	4.974	0.857685	4.984	0.857723	4.418	0.533066	4.489	0.513543	0.967328	0.208955
	A"		6.031	4.896	0.846	5.38	0.887	4.853	0.879	5.362	0.912	5.292	0.847	5.214	0.84555	5.244	0.879	5.104	0.883192	5.162	0.878207	5.18	0.87826	4.879	0.688973	4.951	0.732897	0.969422	0.23598
	A'		8.14	4.737	0.822	6.092	0.875	4.658	0.843	6.059	0.89	6.159	0.854	5.912	0.843977	6.048	0.876	5.698	0.866364	5.797	0.865757	5.788	0.865752	5.675	0.814128	5.714	0.753156	0.943265	0.138126
	A"		8.05	5.87	0.826	6.636	0.865	5.805	0.853	6.605	0.885	6.625	0.829	6.489	0.825836	6.523	0.856	6.323	0.856227	6.383	0.853363	6.395	0.853394	6.304	0.611222
	A'		9.945	6.229	0.816	7.618	0.867	6.153	0.834	7.584	0.881	7.664	0.852	7.407	0.840818	7.578	0.871	7.222	0.860163	7.316	0.859933	7.308	0.859921	7.162	0.792936
	A"		9.562	7.104	0.803	7.799	0.835	7.039	0.827	7.765	0.852	7.918	0.797	7.782	0.794911	7.832	0.821	7.62	0.822332	7.693	0.818783	7.691	0.818781	nc	nc
Syn-DM-HBDI-	Cs		KT	D2	PS(D2)	os-D2	PS(os-D2)	nD-D2	PS(nD-D2)	os-nD-D2	PS(os-nD-D2)	Q3	PS(Q3)	Q3+	PS(Q3+)	nD-L3	PS(nD-L3)	nD-L3+A	PS(nD-L3+A)	nD-L3+B	PS(nD-L3+B)	nD-L3+C	PS(nD-L3+C)	nD-RL3	PS(nD-RL3)	NRL3	PS(NRL3)
	A"	2.7 ± 0.04	3.003	2.338	0.845	2.687	0.894	2.304	0.889	2.676	0.927	2.86	0.86	2.773	0.85707	2.694	0.906	2.527	0.90822	2.607	0.902406	2.622	0.902331	2.559	0.874127	2.545	0.830407	0.995129
	A'	4.9 ± 0.1	6.821	3.022	0.809	4.524	0.864	2.94	0.828	4.489	0.877	4.941	0.863	4.616	0.845611	4.848	0.884	4.359	0.865636	4.517	0.865883	4.474	0.865776	4.356	0.815356	4.243	0.788089	0.790762	0.59926
	A"		5.381	4.158	0.841	4.697	0.886	4.11	0.875	4.678	0.912	4.722	0.85	4.622	0.847237	4.649	0.884	4.456	0.886204	4.545	0.881431	4.554	0.88145	4.384	0.792122
	A"		5.716	4.322	0.828	4.862	0.867	4.267	0.862	4.838	0.892	4.943	0.822	4.843	0.821026	4.822	0.858	4.642	0.862618	4.718	0.856427	4.724	0.856454	nc	nc
	A'		7.953	4.564	0.822	5.918	0.875	4.485	0.843	5.885	0.89	5.978	0.853	5.735	0.843518	5.868	0.875	5.52	0.866032	5.621	0.865345	5.61	0.865337	5.499	0.805528	5.544	0.761916	0.981527	0.102016
	A"		8.592	5.406	0.839	6.631	0.883	5.341	0.858	6.602	0.896	6.711	0.866	6.522	0.858963	6.659	0.885	6.348	0.878341	6.467	0.877582	6.438	0.877526	6.306	0.791353
	A"		7.82	5.598	0.825	6.385	0.865	5.532	0.852	6.355	0.885	6.398	0.83	6.257	0.827084	6.294	0.858	6.081	0.857412	6.149	0.854673	6.157	0.854698	6.034	0.641161
	A"		9.107	5.54	0.85	6.916	0.881	5.474	0.851	6.887	0.894	7.062	0.873	6.829	0.862655	7.019	0.891	6.651	0.879678	6.781	0.87958	6.748	0.879488	6.649	1.11287
	A'		9.762	6.042	0.815	7.433	0.867	5.966	0.834	7.399	0.88	7.487	0.85	7.233	0.839568	7.402	0.87	7.044	0.85896	7.142	0.858655	7.131	0.858637	6.978	0.78652
	A'		9.339	6.839	0.81	7.594	0.842	6.775	0.833	7.562	0.859	7.654	0.806	7.511	0.803363	7.583	0.829	7.363	0.829795	7.436	0.826465	7.437	0.826471	nc	nc

## Sheet: aTZ
PhO-	C2V	Experiment VDE	KT	D2	PS(D2)	os-D2	PS(os-D2)	nD-D2	PS(nD-D2)	os-nD-D2	PS(os-nD-D2)	Q3	PS(Q3)	Q3+	PS(Q3+)	nD-L3	PS(nD-L3)	nD-L3+A	PS(nD-L3+A)	nD-L3+B	PS(nD-L3+B)	nD-L3+C	PS(nD-L3+C)
	B1	2.26 ± 0.03	2.367	1.879	0.86	2.117	0.899	1.858	0.898	2.109	0.927	2.395	0.881	2.304	0.877045	2.288	0.92	2.064	0.924365	2.194	0.916193	2.211	0.916094
	B2	3.22 ± 0.02	5.33	2.031	0.817	3.332	0.869	1.958	0.837	3.3	0.884	3.867	0.885	3.532	0.865903	3.759	0.907	3.251	0.886217	3.418	0.886999	3.398	0.886982
	A2		4.744	4.242	0.86	4.464	0.897	4.222	0.894	4.456	0.922	4.556	0.87	4.479	0.867939	4.496	0.905	4.347	0.908654	4.415	0.902547	4.446	0.902513
	B1		7.368	5.241	0.814	5.847	0.847	5.184	0.838	5.817	0.864	6.184	0.829	6.022	0.822754	6.092	0.853	5.818	0.850559	5.925	0.847227	5.923	0.847232
	B2		8.806	6.434	0.843	7.54	0.892	6.385	0.861	7.522	0.906	7.359	0.885	7.163	0.874771	7.346	0.905	7.052	0.892994	7.146	0.893622	7.168	0.893708
	A1		9.191	6.649	0.84	7.836	0.891	6.595	0.859	7.815	0.905	7.73	0.884	7.509	0.872808	7.68	0.903	7.351	0.891478	7.454	0.891828	7.472	0.89187
DF-PhO-	C2V		KT	D2	PS(D2)	os-D2	PS(os-D2)	nD-D2	PS(nD-D2)	os-nD-D2	PS(os-nD-D2)	Q3	PS(Q3)	Q3+	PS(Q3+)	nD-L3	PS(nD-L3)	nD-L3+A	PS(nD-L3+A)	nD-L3+B	PS(nD-L3+B)	nD-L3+C	PS(nD-L3+C)
	B1	2.61 ± 0.03	2.877	2.355	0.862	2.617	0.9	2.332	0.901	2.608	0.93	2.839	0.881	2.748	0.877616	2.724	0.921	2.523	0.924117	2.63	0.917812	2.655	0.917687
	B2		6.092	2.654	0.816	3.996	0.868	2.579	0.835	3.964	0.883	4.535	0.882	4.196	0.863601	4.418	0.904	3.908	0.883643	4.073	0.884437	4.051	0.884416
	A2		5.102	4.451	0.863	4.746	0.899	4.426	0.898	4.736	0.925	4.766	0.873	4.684	0.871011	4.696	0.908	4.563	0.909986	4.61	0.906119	4.648	0.906108
	B1		8.023	5.914	0.816	6.498	0.846	5.858	0.839	6.468	0.863	6.74	0.822	6.595	0.818102	6.65	0.847	6.412	0.845923	6.499	0.842275	6.505	0.842291
	B1		9.915	7.353	0.813	8.062	0.84	7.296	0.833	8.031	0.855	8.173	0.813	8.021	0.809631	8.113	0.833	7.881	0.83276	7.956	0.82954	7.966	0.829579
Syn-DM-PhO-	C2V		KT	D2	PS(D2)	os-D2	PS(os-D2)	nD-D2	PS(nD-D2)	os-nD-D2	PS(os-nD-D2)	Q3	PS(Q3)	Q3+	PS(Q3+)	nD-L3	PS(nD-L3)	nD-L3+A	PS(nD-L3+A)	nD-L3+B	PS(nD-L3+B)	nD-L3+C	PS(nD-L3+C)
	B1	2.35	2.588	1.978	0.856	2.284	0.897	1.95	0.896	2.274	0.926	2.569	0.878	2.464	0.874187	2.427	0.92	2.194	0.921609	2.318	0.915301	2.338	0.915186
	A2	3.5	5.702	2.33	0.819	3.704	0.872	2.252	0.839	3.671	0.887	4.185	0.885	3.846	0.866249	4.069	0.907	3.554	0.887357	3.724	0.888209	3.704	0.888189
	B2		4.432	3.651	0.856	4.018	0.896	3.62	0.892	4.006	0.922	4.128	0.873	4.026	0.869169	4.028	0.909	3.84	0.90964	3.922	0.90553	3.952	0.905466
	B1		7.879	5.182	0.844	6.245	0.884	5.124	0.863	6.219	0.898	6.263	0.872	6.072	0.864446	6.212	0.892	5.91	0.884948	6.017	0.884124	6.019	0.884133
	A1		7.68	5.346	0.817	6.064	0.85	5.284	0.84	6.033	0.867	6.356	0.833	6.184	0.827084	6.262	0.858	5.975	0.853908	6.084	0.851179	6.081	0.85118
	A2		8.461	5.234	0.838	6.521	0.884	5.171	0.856	6.493	0.898	6.689	0.886	6.438	0.873971	6.632	0.905	6.241	0.891729	6.376	0.892107	6.365	0.892085
	B1		9.537	6.877	0.826	7.957	0.869	6.816	0.847	7.931	0.884	7.977	0.862	7.76	0.851632	7.908	0.881	7.581	0.871556	7.686	0.870948	7.698	0.87098
	B1		9.595	7.005	0.848	8.149	0.894	6.953	0.866	8.127	0.907	8.151	0.89	7.949	0.879748	8.118	0.908	7.786	0.89771	7.912	0.897836	7.91	0.897831
	A1		9.692	7.061	0.846	8.155	0.888	7.009	0.864	8.132	0.902	8.211	0.886	8.018	0.876049	8.174	0.903	7.85	0.89342	7.978	0.893222	7.97	0.893202
p-HBDI-	Cs		KT	D2	PS(D2)	os-D2	PS(os-D2)	nD-D2	PS(nD-D2)	os-nD-D2	PS(os-nD-D2)	Q3	PS(Q3)	Q3+	PS(Q3+)	nD-L3	PS(nD-L3)	nD-L3+A	PS(nD-L3+A)	nD-L3+B	PS(nD-L3+B)	nD-L3+C	PS(nD-L3+C)
	A"	2.74 ± 0.04	2.965	2.578	0.845	2.857	0.894	2.558	0.888	2.853	0.927	2.994	0.859	2.909	0.856512
	A'	4.3 ± 0.1	6.716	3.19	0.801	4.598	0.857	3.113	0.821	4.565	0.871	5.016	0.855	4.688	0.837172
	A"	4.9 ± 0.1	5.668	4.544	0.825	5.008	0.865	4.499	0.86	4.988	0.891	5.083	0.818	4.983	0.817813
	A"		5.859	5.125	0.841	5.489	0.884	5.097	0.874	5.479	0.91	5.44	0.841	5.367	0.839868
	A'		7.833	4.667	0.817	5.981	0.872	4.59	0.839	5.95	0.887	6.049	0.851	5.79	0.840885
	A"		7.712	5.755	0.821	6.473	0.862	5.694	0.849	6.445	0.883	6.499	0.828	6.352	0.82437
	A'		9.562	6.304	0.815	7.624	0.868	6.235	0.834	7.594	0.882	7.607	0.853	7.353	0.841928
	A"		9.116	6.876	0.801	7.541	0.835	6.814	0.825	7.509	0.853	7.687	0.799	7.538	0.795882
	A'		9.723	6.845	0.824	8.117	0.877	6.784	0.843	8.092	0.891	7.936	0.861	7.707	0.850349
	A"		9.973	7.508	0.812	8.34	0.851	7.442	0.835	8.307	0.869	8.421	0.816	8.274	0.812262
DF-HBDI-	Cs		KT	D2	PS(D2)	os-D2	PS(os-D2)	nD-D2	PS(nD-D2)	os-nD-D2	PS(os-nD-D2)	Q3	PS(Q3)	Q3+	PS(Q3+)	nD-L3	PS(nD-L3)	nD-L3+A	PS(nD-L3+A)	nD-L3+B	PS(nD-L3+B)	nD-L3+C	PS(nD-L3+C)
	A"	2.98 ± 0.04	3.26	2.862	0.845	3.144	0.894	2.842	0.889	3.14	0.927	3.263	0.859	3.178	0.856499
	A'	4.5 ± 0.1	7.367	3.627	0.796	5.093	0.852	3.547	0.815	5.059	0.866	5.554	0.852	5.207	0.832867
	A"		5.989	4.85	0.826	5.327	0.865	4.804	0.86	5.308	0.891	5.359	0.819	5.26	0.818121
	A"		6.03	5.095	0.841	5.538	0.884	5.06	0.875	5.524	0.909	5.457	0.842	5.373	0.84121
	A'		8.147	4.985	0.817	6.3	0.871	4.908	0.839	6.268	0.887	6.342	0.85	6.084	0.840178
	A"		8.074	6.102	0.821	6.828	0.861	6.041	0.849	6.8	0.881	6.8	0.824	6.657	0.821086
	A'		9.936	6.445	0.811	7.799	0.864	6.37	0.831	7.766	0.878	7.828	0.849	7.56	0.837292
	A"		9.566	7.285	0.798	7.944	0.831	7.223	0.822	7.911	0.849	8.054	0.793	7.912	0.790357
Syn-DM-HBDI-	Cs		KT	D2	PS(D2)	os-D2	PS(os-D2)	nD-D2	PS(nD-D2)	os-nD-D2	PS(os-nD-D2)	Q3	PS(Q3)	Q3+	PS(Q3+)	nD-L3	PS(nD-L3)	nD-L3+A	PS(nD-L3+A)	nD-L3+B	PS(nD-L3+B)	nD-L3+C	PS(nD-L3+C)
	A"	2.7 ± 0.04	3.011	2.573	0.842	2.874	0.892	2.55	0.886	2.869	0.925	3.041	0.858	2.947	0.854422
	A'	4.9 ± 0.1	5.385	4.368	0.838	4.866	0.883	4.329	0.872	4.851	0.909	4.881	0.847	4.775	0.843988
	A"		6.841	3.275	0.804	4.739	0.86	3.194	0.824	4.705	0.874	5.126	0.86	4.787	0.841881
	A"		5.728	4.549	0.823	5.044	0.863	4.502	0.858	5.024	0.889	5.111	0.817	5.005	0.816178
	A'		7.964	4.816	0.818	6.13	0.872	4.739	0.84	6.098	0.888	6.162	0.849	5.908	0.839761
	A"		7.847	5.834	0.821	6.582	0.862	5.772	0.848	6.553	0.882	6.573	0.826	6.424	0.82262
	A"		8.613	5.653	0.835	6.839	0.879	5.59	0.854	6.811	0.894	6.886	0.863	6.688	0.855609
	A"		9.128	5.785	0.83	7.125	0.879	5.72	0.848	7.096	0.892	7.096	0.892	7.235	0.871
	A'		9.757	6.263	0.811	7.618	0.864	6.187	0.83	7.585	0.878	7.652	0.847	7.385	0.836099
	A'		9.351	7.028	0.806	7.75	0.839	6.965	0.829	7.719	0.856	7.794	0.802	7.644	0.799277

## Sheet: aQZ
PhO-	C2V	Experiment VDE	KT	D2	PS(D2)	os-D2	PS(os-D2)	nD-D2	PS(nD-D2)	os-nD-D2	PS(os-nD-D2)	Q3	PS(Q3)	Q3+	PS(Q3+)	nD-L3	PS(nD-L3)	nD-L3+A	PS(nD-L3+A)	nD-L3+B	PS(nD-L3+B)	nD-L3+C	PS(nD-L3+C)
	B1	2.26 ± 0.03	2.37	1.963	0.859	2.191	0.898	1.945	0.897	2.186	0.927	2.455	0.881	2.362	0.876586
	B2	3.22 ± 0.02	5.333	2.132	0.816	3.426	0.868	2.06	0.836	3.396	0.883	3.942	0.884	3.602	0.865147
	A2		4.746	4.316	0.859	4.53	0.896	4.299	0.893	4.524	0.921	4.608	0.87	4.53	0.867345
	B1		7.37	5.322	0.813	5.919	0.845	5.266	0.837	5.89	0.863	6.242	0.828	6.076	0.821598
	B2		8.809	6.514	0.841	7.615	0.891	6.466	0.86	7.597	0.905	7.42	0.885	7.22	0.874082
	A1		9.192	6.735	0.838	7.915	0.889	6.682	0.858	7.895	0.904	7.794	0.874	7.57	0.864569
DF-PhO-	C2V		KT	D2	PS(D2)	os-D2	PS(os-D2)	nD-D2	PS(nD-D2)	os-nD-D2	PS(os-nD-D2)	Q3	PS(Q3)	Q3+	PS(Q3+)	nD-L3	PS(nD-L3)	nD-L3+A	PS(nD-L3+A)	nD-L3+B	PS(nD-L3+B)	nD-L3+C	PS(nD-L3+C)
	B1	2.61 ± 0.03	2.879	2.444	0.861	2.695	0.9	2.425	0.9	2.689	0.929	2.91	0.881	2.816	0.877065
	B2		6.095	2.758	0.814	4.093	0.867	2.684	0.834	4.061	0.881	4.617	0.882	4.271	0.862738
	A2		5.104	4.534	0.862	4.819	0.899	4.511	0.897	4.811	0.924	4.832	0.872	4.748	0.870269
	B1		8.025	5.994	0.814	6.569	0.845	5.94	0.838	6.541	0.862	6.803	0.821	6.654	0.816587
	B1		9.918	7.436	0.811	8.135	0.838	7.38	0.831	8.105	0.853	8.237	0.811	8.081	0.808117
Syn-DM-PhO-	C2V		KT	D2	PS(D2)	os-D2	PS(os-D2)	nD-D2	PS(nD-D2)	os-nD-D2	PS(os-nD-D2)	Q3	PS(Q3)	Q3+	PS(Q3+)	nD-L3	PS(nD-L3)	nD-L3+A	PS(nD-L3+A)	nD-L3+B	PS(nD-L3+B)	nD-L3+C	PS(nD-L3+C)
	B1	2.35	2.592	2.066	0.855	2.362	0.896	2.041	0.895	2.354	0.926	2.634	0.878	2.526	0.873724
	A2	3.5	5.706	2.435	0.817	3.801	0.871	2.358	0.838	3.769	0.886	4.263	0.884	3.918	0.865485
	B2		4.435	3.734	0.855	4.091	0.896	3.705	0.891	4.081	0.922	4.188	0.872	4.085	0.86858
	B1		7.683	5.43	0.816	6.14	0.849	5.371	0.839	6.11	0.866	6.418	0.832	6.242	0.825791
	A1		7.884	5.276	0.843	6.331	0.883	5.219	0.862	6.306	0.897	6.332	0.871	6.137	0.863626
	A2		8.466	5.333	0.837	6.613	0.884	5.272	0.855	6.586	0.897	6.762	0.886	6.506	0.873299
	B1		9.539	6.964	0.825	8.036	0.865	6.904	0.845	8.011	0.882	nc	nc	nc	nc
	B1		9.599	7.094	0.847	8.231	0.893	7.043	0.865	8.211	0.907	8.217	0.891	8.01	0.880156
	A1		9.696	7.149	0.845	8.235	0.887	7.097	0.863	8.213	0.9	8.277	0.914	8.075	0.898288
p-HBDI-	Cs		KT	D2	PS(D2)	os-D2	PS(os-D2)	nD-D2	PS(nD-D2)	os-nD-D2	PS(os-nD-D2)	Q3	PS(Q3)	Q3+	PS(Q3+)	nD-L3	PS(nD-L3)	nD-L3+A	PS(nD-L3+A)	nD-L3+B	PS(nD-L3+B)	nD-L3+C	PS(nD-L3+C)
	A"	2.74 ± 0.04	2.968	2.662	0.844	2.932	0.893	2.647	0.887	2.931	0.926	3.059	0.859	2.971	0.855806
	A'	4.3 ± 0.1	6.72	3.289	0.799	4.691	0.855	3.214	0.819	4.659	0.87	5.092	0.854	4.759	0.835866
	A"	4.9 ± 0.1	5.671	4.628	0.824	5.082	0.863	4.586	0.858	5.065	0.889	5.145	0.817	5.044	0.816174
	A"		5.861	5.198	0.84	5.554	0.884	5.172	0.873	5.545	0.909	5.494	0.84	5.419	0.838858
	A'		7.835	4.767	0.816	6.074	0.87	4.692	0.838	6.044	0.886	6.127	0.85	5.863	0.839645
	A"		7.715	5.84	0.82	6.55	0.861	5.781	0.848	6.523	0.881	6.563	0.826	6.414	0.822892
	A'		9.564	6.393	0.814	7.707	0.867	6.325	0.833	7.678	0.881	7.678	0.852	7.419	0.840818
	A"		9.118	6.953	0.799	7.61	0.834	6.893	0.824	7.579	0.852	7.744	0.797	7.592	0.794211
	A'		9.726	6.931	0.823	8.198	0.876	6.871	0.842	8.174	0.89	8.004	0.861	7.771	0.849851
	A"		9.975	7.595	0.81	8.418	0.849	7.531	0.834	8.387	0.868	8.548	1	8.574	0.13485
DF-HBDI-	Cs		KT	D2	PS(D2)	os-D2	PS(os-D2)	nD-D2	PS(nD-D2)	os-nD-D2	PS(os-nD-D2)	Q3	PS(Q3)	Q3+	PS(Q3+)	nD-L3	PS(nD-L3)	nD-L3+A	PS(nD-L3+A)	nD-L3+B	PS(nD-L3+B)	nD-L3+C	PS(nD-L3+C)
	A"	2.98 ± 0.04	3.263	2.95	0.844	3.222	0.893	2.934	0.888	3.22	0.926	3.334	0.859	3.246	0.855742
	A'	4.5 ± 0.1	5.992	4.936	0.824	5.404	0.864	4.893	0.859	5.386	0.89	5.426	0.817	5.324	0.816391
	A"		6.032	5.176	0.84	5.609	0.883	5.143	0.874	5.597	0.908	5.523	0.841	5.437	0.839931
	A"		7.371	3.729	0.794	5.189	0.85	3.65	0.813	5.155	0.864	5.635	0.851	5.282	0.831418
	A'		8.077	6.188	0.82	6.905	0.86	6.129	0.847	6.878	0.88	6.866	0.822	6.721	0.819364
	A"		8.149	5.085	0.816	6.393	0.87	5.01	0.838	6.362	0.886	6.421	0.849	6.159	0.838877
	A'		9.568	7.362	0.797	8.012	0.829	7.301	0.821	7.981	0.847	8.115	0.791	7.969	0.788446
	A"		9.938	6.539	0.81	7.886	0.863	6.465	0.83	7.854	0.877	7.904	0.848	7.63	0.836133
Syn-DM-HBDI-	Cs		KT	D2	PS(D2)	os-D2	PS(os-D2)	nD-D2	PS(nD-D2)	os-nD-D2	PS(os-nD-D2)	Q3	PS(Q3)	Q3+	PS(Q3+)	nD-L3	PS(nD-L3)	nD-L3+A	PS(nD-L3+A)	nD-L3+B	PS(nD-L3+B)	nD-L3+C	PS(nD-L3+C)
	A"	2.7 ± 0.04	3.015	2.66	0.841	2.951	0.891	2.641	0.885	2.949	0.925
	A'	4.9 ± 0.1	5.388	4.448	0.836	4.938	0.883	4.411	0.871	4.925	0.909
	A"		6.845	3.377	0.802	4.835	0.858	3.298	0.823	4.802	0.873
	A"		5.732	4.634	0.822	5.119	0.862	4.59	0.857	5.101	0.888
	A'		7.851	5.92	0.819	6.659	0.86	5.86	0.847	6.632	0.881
	A"		7.966	4.916	0.816	6.223	0.871	4.84	0.838	6.192	0.887
	A"		8.619	5.752	0.834	6.93	0.878	5.69	0.853	6.903	0.893
	A"		9.133	5.884	0.829	7.217	0.878	5.82	0.847	7.189	0.891
	A'		9.354	7.105	0.804	7.818	0.837	7.044	0.828	7.788	0.855
	A'		9.759	6.356	0.81	7.705	0.862	6.282	0.829	7.673	0.877

## Sheet: Quartic_CM1
PhO-	Experiment VDE		C2V		os-nD-D2 CBS(DT)	os-nD-D2 (aDZ)	nD-L3+B (aDZ)		CM1
	2.26 ± 0.03		B1		2.17586	1.919	2.067		2.32386
	3.22 ± 0.02		B2		3.37461	3.088	3.282		3.56861
			A2		4.51442	4.29	4.31		4.53442
			B1		5.87155	5.662	5.83		6.03955
			B2		7.57866	7.361	7.046		7.26366
			A1		7.86814	7.664	7.368		7.57214
DF-PhO-	Experiment VDE		C2V		os-nD-D2 CBS(DT)	os-nD-D2 (aDZ)	nD-L3+B (aDZ)		CM1
	2.61 ± 0.03		B1		2.67557	2.416	2.484		2.74357
			B2		4.03861	3.752	3.925		4.21161
			A2		4.79794	4.56	4.479		4.71694
			B1		6.52079	6.318	6.394		6.59679
			B1		8.08308	7.883	7.854		8.05408
Syn-DM-PhO-	Experiment VDE		C2V		os-nD-D2 CBS(DT)	os-nD-D2 (aDZ)	nD-L3+B (aDZ)		CM1
	2.35		B1		2.34192	2.081	2.184		2.44492
	3.5		A2		3.74701	3.455	3.581		3.87301
			B2		4.07005	3.824	3.798		4.04405
			B1		6.34323	5.866	5.974		6.45123
			A1		6.03828	6.018	5.881		5.90128
			A2		6.5662	6.285	6.239		6.5202
			B1		7.98449	7.779	7.595		7.80049
			B1		8.18788	7.954	7.806		8.03988
			A1		8.19112	7.964	7.876		8.10312
p-HBDI-	Experiment VDE		Cs		os-nD-D2 CBS(DT)	os-nD-D2 (aDZ)	nD-L3+B (aDZ)		CM1
	2.74 ± 0.04		A"		2.92057	2.661	2.599		2.85857
	4.3 ± 0.1		A'		4.63855	4.356	4.434		4.71655
	4.9 ± 0.1		A"		5.0531	4.803	4.706		4.9561
			A"		5.53425	5.322	5.196		5.40825
			A'		6.02531	5.736	5.504		5.79331
			A"		6.51433	6.248	6.079		6.34533
			A'		7.65418	7.423	7.147		7.37818
			A"		7.56284	7.356	7.325		7.53184
			A'		8.15253	7.92	7.529		7.76153
			A"		8.36647	8.138	8.029		8.25747
DF-HBDI-	Experiment VDE		Cs		os-nD-D2 CBS(DT)	os-nD-D2 (aDZ)	nD-L3+B (aDZ)		CM1
	2.98 ± 0.04		A"		3.20757	2.948	2.848		3.10757
	4.5 ± 0.1		A'		5.13325	4.848	4.932		5.21725
			A"		5.37416	5.12	4.974		5.22816
			A"		5.58101	5.362	5.162		5.38101
			A'		6.34155	6.059	5.797		6.07955
			A"		6.86862	6.605	6.383		6.64662
			A'		7.83005	7.584	7.316		7.56205
			A"		7.96238	7.765	7.693		7.89038
Syn-DM-HBDI-	Experiment VDE		Cs		os-nD-D2 CBS(DT)	os-nD-D2 (aDZ)	nD-L3+B (aDZ)		CM1
	2.7 ± 0.04		A"		2.93692	2.676	2.607		2.86792
	4.9 ± 0.1		A'		4.97839	4.489	4.517		5.00639
			A"		4.7145	4.678	4.545		4.5815
			A"		5.08946	4.838	4.718		4.96946
			A'		6.17296	5.885	5.621		5.90896
			A"		6.53576	6.602	6.467		6.40076
			A"		6.97147	6.355	6.149		6.76547
			A"		7.16955	6.887	6.781		7.06355
			A'		7.65046	7.399	7.142		7.39346
			A'		7.77425	7.562	7.436		7.64825

## Sheet: Quartic_CM2
PhO-	Experiment VDE		C2V		os-nD-D2 CBS(DT)	os-nD-D2 (aDZ)	Q3+ (aDZ)		CM2
	2.26 ± 0.03		B1		2.17586	1.919	2.147		2.40386
	3.22 ± 0.02		B2		3.37461	3.088	3.375		3.66161
			A2		4.51442	4.29	4.344		4.56842
			B1		5.87155	5.662	5.903		6.11255
			B2		7.57866	7.361	7.042		7.25966
			A1		7.86814	7.664	7.401		7.60514
DF-PhO-	Experiment VDE		C2V		os-nD-D2 CBS(DT)	os-nD-D2 (aDZ)	Q3+ (aDZ)		CM2
	2.61 ± 0.03		B1		2.67557	2.416	2.572		2.83157
			B2		4.03861	3.752	4.027		4.31361
			A2		4.79794	4.56	4.522		4.75994
			B1		6.52079	6.318	6.465		6.66779
			B1		8.08308	7.883	7.897		8.09708
Syn-DM-PhO-	Experiment VDE		C2V		os-nD-D2 CBS(DT)	os-nD-D2 (aDZ)	Q3+ (aDZ)		CM2
	2.35		B1		2.34192	2.081	2.298		2.55892
	3.5		A2		3.74701	3.455	3.681		3.97301
			B2		4.07005	3.824	3.871		4.11705
			B1		6.34323	5.866	6.05		6.52723
			A1		6.03828	6.018	5.915		5.93528
			A2		6.5662	6.285	6.28		6.5612
			B1		7.98449	7.779	7.647		7.85249
			B1		8.18788	7.954	7.821		8.05488
			A1		8.19112	7.964	7.894		8.12112
p-HBDI-	Experiment VDE		Cs		os-nD-D2 CBS(DT)	os-nD-D2 (aDZ)	Q3+ (aDZ)		CM2
	2.74 ± 0.04		A"		2.92057	2.661	2.74		2.99957
	4.3 ± 0.1		A'		4.63855	4.356	4.526		4.80855
	4.9 ± 0.1		A"		5.0531	4.803	4.824		5.0741
			A"		5.53425	5.322	5.232		5.44425
			A'		6.02531	5.736	5.619		5.90831
			A"		6.51433	6.248	6.188		6.45433
			A'		7.65418	7.423	7.214		7.44518
			A"		7.56284	7.356	7.412		7.61884
			A'		8.15253	7.92	7.569		7.80153
			A"		8.36647	8.138	8.136		8.36447
DF-HBDI-	Experiment VDE		Cs		os-nD-D2 CBS(DT)	os-nD-D2 (aDZ)	Q3+ (aDZ)		CM2
	2.98 ± 0.04		A"		3.20757	2.948	2.996		3.25557
	4.5 ± 0.1		A'		5.13325	4.848	5.036		5.32125
			A"		5.37416	5.12	5.092		5.34616
			A"		5.58101	5.362	5.214		5.43301
			A'		6.34155	6.059	5.912		6.19455
			A"		6.86862	6.605	6.489		6.75262
			A'		7.83005	7.584	7.407		7.65305
			A"		7.96238	7.765	7.782		7.97938
Syn-DM-HBDI-	Experiment VDE		Cs		os-nD-D2 CBS(DT)	os-nD-D2 (aDZ)	Q3+ (aDZ)		CM2
	2.7 ± 0.04		A"		2.93692	2.676	2.773		3.03392
	4.9 ± 0.1		A'		4.7145	4.678	4.622		4.6585
			A"		5.08946	4.838	4.843		5.09446
			A"		4.97839	4.489	4.616		5.10539
			A'		6.17296	5.885	5.735		6.02296
			A"		6.53576	6.602	6.522		6.45576
			A"		6.97147	6.355	6.257		6.87347
			A"		7.16955	6.887	6.829		7.11155
			A'		7.65046	7.399	7.233		7.48446
			A'		7.77425	7.562	7.511		7.72325

## Sheet: Quartic_CM3
PhO-	Experiment VDE		C2V		os-nD-D2 CBS(TQ)	os-nD-D2 (aTZ)	nD-L3+B (aTZ)		CM3
	2.26 ± 0.03		B1		2.23044	2.109	2.194		2.31544
	3.22 ± 0.02		B2		3.45141	3.3	3.418		3.56941
			A2		4.56325	4.456	4.415		4.52225
			B1		5.93213	5.817	5.925		6.04013
			B2		7.64029	7.522	7.146		7.26429
			A1		7.90152	7.799	7.796		7.89852
DF-PhO-	Experiment VDE		C2V		os-nD-D2 CBS(TQ)	os-nD-D2 (aTZ)	nD-L3+B (aTZ)		CM3
	2.61 ± 0.03		B1		2.73575	2.608	2.63		2.75775
			B2		4.11698	3.964	4.073		4.22598
			A2		4.85429	4.736	4.61		4.72829
			B1		6.58313	6.468	6.499		6.61413
			B1		8.14771	8.031	7.956		8.07271
Syn-DM-PhO-	Experiment VDE		C2V		os-nD-D2 CBS(TQ)	os-nD-D2 (aTZ)	nD-L3+B (aTZ)		CM3
	2.35		B1		2.40017	2.274	2.318		2.44417
	3.5		A2		3.82556	3.671	3.724		3.87856
			B2		4.12429	4.006	3.922		4.04029
			B1		6.04709	6.219	6.017		5.84509
			A1		6.46357	6.033	6.084		6.51457
			A2		6.63968	6.493	6.376		6.52268
			B1		8.05717	7.931	7.686		7.81217
			B1		8.25948	8.127	7.912		8.04448
			A1		8.25975	8.132	7.978		8.10575
p-HBDI-	Experiment VDE		Cs		os-nD-D2 CBS(TQ)	os-nD-D2 (aTZ)	nD-L3+B (aTZ)		CM3
	2.74 ± 0.04		A"		2.97602	2.853
	4.3 ± 0.1		A'		4.71325	4.565
	4.9 ± 0.1		A"		5.10944	4.988
			A"		5.58309	5.479
			A'		6.09825	5.95
			A"		6.56802	6.445
			A'		7.72648	7.594
			A"		7.6194	7.509
			A'		8.22133	8.092
			A"		8.43317	8.307
DF-HBDI-	Experiment VDE		Cs		os-nD-D2 CBS(TQ)	os-nD-D2 (aTZ)	nD-L3+B (aTZ)		CM3
	2.98 ± 0.04		A"		3.26617	3.14
	4.5 ± 0.1		A'		5.57473	5.059
			A"		5.7638	5.308
			A"		4.94203	5.524
			A'		7.23007	6.268
			A"		6.1092	6.8
			A'		8.10509	7.766
			A"		7.8211	7.911
Syn-DM-HBDI-	Experiment VDE		Cs		os-nD-D2 CBS(TQ)	os-nD-D2 (aTZ)	nD-L3+B (aTZ)		CM3
	2.7 ± 0.04		A"		2.99517	2.869
	4.9 ± 0.1		A'		4.96771	4.851
			A"		4.85798	4.705
			A"		5.14544	5.024
			A'		6.94021	6.098
			A"		5.98364	6.553
			A"		6.9561	6.811
			A"		7.24268	7.096
			A'		7.90516	7.585
			A'		7.64645	7.719

## Sheet: Quartic_CM4
PhO-	Experiment VDE		C2V		os-nD-D2 CBS(TQ)	os-nD-D2 (aTZ)	Q3+ (aTZ)		CM4
	2.26 ± 0.03		B1		2.23044	2.109	2.304		2.42544
	3.22 ± 0.02		B2		3.45141	3.3	3.532		3.68341
			A2		4.56325	4.456	4.479		4.58625
			B1		5.93213	5.817	6.022		6.13713
			B2		7.64029	7.522	7.163		7.28129
			A1		7.94117	7.815	7.509		7.63517
DF-PhO-	Experiment VDE		C2V		os-nD-D2 CBS(TQ)	os-nD-D2 (aTZ)	Q3+ (aTZ)		CM4
	2.61 ± 0.03		B1		2.73575	2.608	2.748		2.87575
			B2		4.11698	3.964	4.196		4.34898
			A2		4.85429	4.736	4.684		4.80229
			B1		6.58313	6.468	6.595		6.71013
			B1		8.14771	8.031	8.021		8.13771
Syn-DM-PhO-	Experiment VDE		C2V		os-nD-D2 CBS(TQ)	os-nD-D2 (aTZ)	Q3+ (aTZ)		CM4
	2.35		B1		2.40017	2.274	2.464		2.59017
	3.5		A2		3.82556	3.671	3.846		4.00056
			B2		4.12429	4.006	4.026		4.14429
			B1		6.04709	6.219	6.072		5.90009
			A1		6.46357	6.033	6.184		6.61457
			A2		6.63968	6.493	6.438		6.58468
			B1		8.05717	7.931	7.76		7.88617
			B1		8.25948	8.127	7.949		8.08148
			A1		8.25975	8.132	8.018		8.14575
p-HBDI-	Experiment VDE		Cs		os-nD-D2 CBS(TQ)	os-nD-D2 (aTZ)	Q3+ (aTZ)		CM4
	2.74 ± 0.04		A"		2.97602	2.853	2.909		3.03202
	4.3 ± 0.1		A'		4.71325	4.565	4.688		4.83625
	4.9 ± 0.1		A"		5.10944	4.988	4.983		5.10444
			A"		5.58309	5.479	5.367		5.47109
			A'		6.09825	5.95	5.79		5.93825
			A"		6.56802	6.445	6.352		6.47502
			A'		7.72648	7.594	7.353		7.48548
			A"		7.6194	7.509	7.538		7.6484
			A'		8.22133	8.092	7.707		7.83633
			A"		8.43317	8.307	8.274		8.40017
DF-HBDI-	Experiment VDE		Cs		os-nD-D2 CBS(TQ)	os-nD-D2 (aTZ)	Q3+ (aTZ)		CM4
	2.98 ± 0.04		A"		3.26617	3.14	3.178		3.30417
	4.5 ± 0.1		A'		5.57473	5.059	5.207		5.72273
			A"		5.7638	5.308	5.26		5.7158
			A"		4.94203	5.524	5.373		4.79103
			A'		7.23007	6.268	6.084		7.04607
			A"		6.1092	6.8	6.657		5.9662
			A'		8.10509	7.766	7.56		7.89909
			A"		7.8211	7.911	7.912		7.8221
Syn-DM-HBDI-	Experiment VDE		Cs		os-nD-D2 CBS(TQ)	os-nD-D2 (aTZ)	Q3+ (aTZ)		CM4
	2.7 ± 0.04		A"		2.99517	2.869	2.947		3.07317
	4.9 ± 0.1		A'		4.96771	4.851	4.775		4.89171
			A"		4.85798	4.705	4.787		4.93998
			A"		5.14544	5.024	5.005		5.12644
			A'		6.94021	6.098	5.908		6.75021
			A"		5.98364	6.553	6.424		5.85464
			A"		6.9561	6.811	6.688		6.8331
			A"		7.24268	7.096	7.235		7.38168
			A'		7.90516	7.585	7.385		7.70516
			A'		7.64645	7.719	7.644		7.57145

## Sheet: Quartic_CM5
PhO-	Experiment VDE		C2V		os-nD-D2 CBS(DT)	os-nD-D2 (aDZ)	nD-RL3 (aDZ)		CM5
	2.26 ± 0.03		B1		2.17586	1.919	2.022		2.27886
	3.22 ± 0.02		B2		3.37461	3.088	3.179		3.46561
			A2		4.51442	4.29	4.186		4.41042
			B1		5.87155	5.662	5.329		5.53855
			B2		7.57866	7.361	6.981		7.19866
			A1		7.86814	7.664	7.325		7.52914
DF-PhO-	Experiment VDE		C2V		os-nD-D2 CBS(DT)	os-nD-D2 (aDZ)	nD-RL3 (aDZ)		CM5
	2.61 ± 0.03		B1		2.67557	2.416	2.447		2.70657
			B2		4.03861	3.752	3.813		4.09961
			A2		4.79794	4.56	4.385		4.62294
			B1		6.52079	6.318	5.842		6.04479
			B1		8.08308	7.883	7.586		7.78608
Syn-DM-PhO-	Experiment VDE		C2V		os-nD-D2 CBS(DT)	os-nD-D2 (aDZ)	nD-RL3 (aDZ)		CM5
	2.35		B1		2.34192	2.081	2.161		2.42192
	3.5		A2		3.74701	3.455	3.503		3.79501
			B2		4.07005	3.824	3.744		3.99005
			B1		6.34323	5.866	5.554		6.03123
			A1		6.03828	6.018	5.792		5.81228
			A2		6.5662	6.285	6.157		6.4382
			B1		7.98449	7.779	7.409		7.61449
			B1		8.18788	7.954	7.72		7.95388
			A1		8.19112	7.964	7.778		8.00512
p-HBDI-	Experiment VDE		Cs		os-nD-D2 CBS(DT)	os-nD-D2 (aDZ)	nD-RL3 (aDZ)		CM5
	2.74 ± 0.04		A"		2.92057	2.661	2.536		2.79557
	4.3 ± 0.1		A'		4.63855	4.356	4.211		4.49355
	4.9 ± 0.1		A"		5.0531	4.803	-		-
			A"		5.53425	5.322	4.885		5.09725
			A'		6.02531	5.736	5.385		5.67431
			A"		6.51433	6.248	5.964		6.23033
			A'		7.65418	7.423	6.974		7.20518
			A"		7.56284	7.356	5.883		6.08984
			A'		8.15253	7.92	7.417		7.64953
			A"		8.36647	8.138	-		-
DF-HBDI-	Experiment VDE		Cs		os-nD-D2 CBS(DT)	os-nD-D2 (aDZ)	nD-RL3 (aDZ)		CM5
	2.98 ± 0.04		A"		3.20757	2.948	2.79		3.04957
	4.5 ± 0.1		A'		5.13325	4.848	4.684		4.96925
			A"		5.37416	5.12	4.418		4.67216
			A"		5.58101	5.362	4.879		5.09801
			A'		6.34155	6.059	5.675		5.95755
			A"		6.86862	6.605	6.304		6.56762
			A'		7.83005	7.584	7.162		7.40805
			A"		7.96238	7.765	nc		-
Syn-DM-HBDI-	Experiment VDE		Cs		os-nD-D2 CBS(DT)	os-nD-D2 (aDZ)	nD-RL3 (aDZ)		CM5
	2.7 ± 0.04		A"		2.93692	2.676	2.559		2.81992
	4.9 ± 0.1		A'		4.97839	4.489	4.356		4.84539
			A"		4.7145	4.678	4.384		4.4205
			A"		5.08946	4.838	nc		-
			A'		6.17296	5.885	5.499		5.78696
			A"		6.53576	6.602	6.306		6.23976
			A"		6.97147	6.355	6.034		6.65047
			A"		7.16955	6.887	6.649		6.93155
			A'		7.65046	7.399	6.978		7.22946
			A'		7.77425	7.562	nc		-

## Sheet: Quartic_CM7
PhO-	Experiment VDE		C2V		os-nD-D2 CBS(TQ)	os-nD-D2 (aTZ)	Q3+ (aTZ)	Q3+ (aDZ)	nD-L3+B (aDZ)		CM7
	2.26 ± 0.03		B1		2.23044	2.109	2.304	2.147	2.067		2.34544
	3.22 ± 0.02		B2		3.45141	3.3	3.532	3.375	3.282		3.59041
			A2		4.56325	4.456	4.479	4.344	4.31		4.55225
			B1		5.93213	5.817	6.022	5.903	5.83		6.06413
			B2		7.64029	7.522	7.163	7.042	7.046		7.28529
			A1		7.94117	7.815	7.509	7.401	7.368		7.60217
DF-PhO-			C2V		os-nD-D2 CBS(TQ)	os-nD-D2 (aTZ)	Q3+ (aTZ)	Q3+ (aDZ)	nD-L3+B (aDZ)		CM7
	2.61 ± 0.03		B1		2.73575	2.608	2.748	2.572	2.484		2.78775
			B2		4.11698	3.964	4.196	4.027	3.925		4.24698
			A2		4.85429	4.736	4.684	4.522	4.479		4.75929
			B1		6.58313	6.468	6.595	6.465	6.394		6.63913
			B1		8.14771	8.031	8.021	7.897	7.854		8.09471
Syn-DM-PhO-			C2V		os-nD-D2 CBS(TQ)	os-nD-D2 (aTZ)	Q3+ (aTZ)	Q3+ (aDZ)	nD-L3+B (aDZ)		CM7
	2.35		B1		2.40017	2.274	2.464	2.298	2.184		2.47617
	3.5		A2		3.82556	3.671	3.846	3.681	3.581		3.90056
			B2		4.12429	4.006	4.026	3.871	3.798		4.07129
			B1		6.04709	6.219	6.072	6.05	5.974		5.82409
			A1		6.46357	6.033	6.184	5.915	5.881		6.58057
			A2		6.63968	6.493	6.438	6.28	6.239		6.54368
			B1		8.05717	7.931	7.76	7.647	7.595		7.83417
			B1		8.25948	8.127	7.949	7.821	7.806		8.06648
			A1		8.25975	8.132	8.018	7.894	7.876		8.12775
p-HBDI-			Cs		os-nD-D2 CBS(TQ)	os-nD-D2 (aTZ)	Q3+ (aTZ)	Q3+ (aDZ)	nD-L3+B (aDZ)		CM7
	2.74 ± 0.04		A"		2.97602	2.853	2.909	2.74	2.599		2.89102
	4.3 ± 0.1		A'		4.71325	4.565	4.688	4.526	4.434		4.74425
	4.9 ± 0.1		A"		5.10944	4.988	4.983	4.824	4.706		4.98644
			A"		5.58309	5.479	5.367	5.232	5.196		5.43509
			A'		6.09825	5.95	5.79	5.619	5.504		5.82325
			A"		6.56802	6.445	6.352	6.188	6.079		6.36602
			A'		7.72648	7.594	7.353	7.214	7.147		7.41848
			A"		7.6194	7.509	7.538	7.412	7.325		7.5614
			A'		8.22133	8.092	7.707	7.569	7.529		7.79633
			A"		8.43317	8.307	8.274	8.136	8.029		8.29317
DF-HBDI-			Cs		os-nD-D2 CBS(TQ)	os-nD-D2 (aTZ)	Q3+ (aTZ)	Q3+ (aDZ)	nD-L3+B (aDZ)		CM7
	2.98 ± 0.04		A"		3.26617	3.14	3.178	2.996	2.848		3.15617
	4.5 ± 0.1		A'		5.57473	5.059	5.207	5.036	4.932		5.61873
			A"		5.7638	5.308	5.26	5.092	4.974		5.5978
			A"		4.94203	5.524	5.373	5.214	5.162		4.73903
			A'		7.23007	6.268	6.084	5.912	5.797		6.93107
			A"		6.1092	6.8	6.657	6.489	6.383		5.8602
			A'		8.10509	7.766	7.56	7.407	7.316		7.80809
			A"		7.8211	7.911	7.912	7.782	7.693		7.7331
Syn-DM-HBDI-			Cs		os-nD-D2 CBS(TQ)	os-nD-D2 (aTZ)	Q3+ (aTZ)	Q3+ (aDZ)	nD-L3+B (aDZ)		CM7
	2.7 ± 0.04		A"		2.99517	2.869	2.947	2.773	2.607		2.90717
	4.9 ± 0.1		A'		4.96771	4.851	4.775	4.616	4.517		4.79271
			A"		4.85798	4.705	4.787	4.622	4.545		4.86298
			A"		5.14544	5.024	5.005	4.843	4.718		5.00144
			A'		6.94021	6.098	5.908	5.735	5.621		6.63621
			A"		5.98364	6.553	6.424	6.522	6.467		5.79964
			A"		6.9561	6.811	6.688	6.257	6.149		6.7251
			A"		7.24268	7.096	7.235	6.829	6.781		7.33368
			A'		7.90516	7.585	7.385	7.233	7.142		7.61416
			A'		7.64645	7.719	7.644	7.511	7.436		7.49645

## Sheet: Quartic_CM8
PhO-	Experiment VDE		C2V		os-nD-D2 CBS(DT)	os-nD-D2 (aDZ)	NRL3 (aDZ)		CM8
	2.26 ± 0.03		B1		2.17586	1.919	1.972		2.22886
	3.22 ± 0.02		B2		3.37461	3.088	3.18		3.46661
			A2		4.51442	4.29	4.202		4.42642
			B1		5.87155	5.662	5.426		5.63555
			B2		7.57866	7.361	6.967		7.18466
			A1		7.86814	7.664	7.028		7.23214
DF-PhO-	Experiment VDE		C2V		os-nD-D2 CBS(DT)	os-nD-D2 (aDZ)	NRL3 (aDZ)		CM8
	2.61 ± 0.03		B1		2.67557	2.416	2.4		2.65957
			B2		4.03861	3.752	3.83		4.11661
			A2		4.79794	4.56	4.393		4.63094
			B1		6.52079	6.318	5.941		6.14379
			B1		8.08308	7.883	7.878		8.07808
Syn-DM-PhO-	Experiment VDE		C2V		os-nD-D2 CBS(DT)	os-nD-D2 (aDZ)	NRL3 (aDZ)		CM8
	2.35		B1		2.34192	2.081	2.11		2.37092
	3.5		A2		3.74701	3.455	3.432		3.72401
			B2		4.07005	3.824	3.787		4.03305
			B1		6.03828	6.018	5.769		5.78928
			A1		6.34323	5.866	5.608		6.08523
			A2		6.5662	6.285	6.106		6.3872
			B1		7.98449	7.779	7.127		7.33249
			B1		8.18788	7.954	7.406		7.63988
			A1		8.19112	7.964	7.718		7.94512
p-HBDI-	Experiment VDE		Cs		os-nD-D2 CBS(DT)	os-nD-D2 (aDZ)	NRL3 (aDZ)		CM8
	2.74 ± 0.04		A"		2.92057	2.661	2.523		2.78257
	4.3 ± 0.1		A'		4.63855	4.356	4.216		4.49855
	4.9 ± 0.1		A"		5.0531	4.803	4.915		5.1651
			A"		5.53425	5.322	5.396		5.60825
			A'		6.02531	5.736	5.612		5.90131
			A"		6.51433	6.248	6.89		7.15633
			A'		7.65418	7.423	7.62		7.85118
			A"		7.56284	7.356	7.626		7.83284
			A'		8.15253	7.92	-		-
			A"		8.36647	8.138	-		-
DF-HBDI-	Experiment VDE		Cs		os-nD-D2 CBS(DT)	os-nD-D2 (aDZ)	NRL3 (aDZ)		CM8
	2.98 ± 0.04		A"		3.20757	2.948	2.779		3.03857
	4.5 ± 0.1		A'		5.13325	4.848	4.489		4.77425
			A"		5.37416	5.12	4.691		4.94516
			A"		5.58101	5.362	4.951		5.17001
			A'		6.34155	6.059	5.714		5.99655
			A"		6.86862	6.605	-		-
			A'		7.83005	7.584	-		-
			A"		7.96238	7.765	-		-
Syn-DM-HBDI-	Experiment VDE		Cs		os-nD-D2 CBS(DT)	os-nD-D2 (aDZ)	NRL3 (aDZ)		CM8
	2.7 ± 0.04		A"		2.93692	2.676	2.545		2.80592
	4.9 ± 0.1		A'		4.97839	4.489	4.243		4.73239
			A"		4.7145	4.678	-		-
			A"		5.08946	4.838	-		-
			A'		6.17296	5.885	-		-
			A"		6.53576	6.602	-		-
			A"		6.97147	6.355	-		-
			A"		7.16955	6.887	-		-
			A'		7.65046	7.399	-		-
			A'		7.77425	7.562	-		-
