# Supplementary material for: New-generation electron-propagator methods for vertical electron detachment energies of molecular anions: benchmarks and applications to model green-fluorescent-protein chromophores
Source: Royal Society of Chemistry journal article supplement (doi:10.1039/d4cp00441h), 2024-01-01
Supplement: d4cp00441h44.xlsx [file d4cp00441h44.xlsx]

## Sheet: aDZ-VEDEs
				CCSD(T)/ aug-cc-pVDZ Versus EPT/ aug-cc-pVDZ
Anions	CCSD(T) VEDE	Final State		KT	D2	PS(D2)	os-D2	PS(os-D2)	nD-D2	PS(nD-D2)	os-nD-D2	PS(os-nD-D2)	D3	PS(D3)	OVGF-A	PS(OVGF-A)	OVGF-B	PS(OVGF-B)	OVGF-C	PS(OVGF-C)	nD-D3	PS(nD-D3)	nD-OVGF-A	PS(nD-OVGF-A)	nD-OVGF-B	PS(nD-OVGF-B)	nD-OVGF-C	PS(nD-OVGF-C)	P3	PS(P3)	P3+	PS(P3+)	Q3	PS(Q3)	Q3+	PS(Q3+)	L3	PS(L3)	L3+A	PS(L3+A)	L3+B	PS(L3+B)	L3+C	PS(L3+C)	nD-L3	PS(nD-L3)	nD-L3+A	PS(nD-L3+A)	nD-L3+B
AlH4–	4.78	2-4 2T2		5.362	4.813	0.923	5.028	0.936	4.805	0.936	5.023	0.948	4.85	0.905	4.835	0.913195	4.976	0.903623	4.906	0.893668	4.84	0.924	4.826	0.92929	4.967	0.924922	4.893	0.91774	4.621	0.909	4.631	0.910129	4.615	0.909	4.625	0.91017	4.787	0.904	4.794	0.907981	4.826	0.903733	4.803	0.910234	4.776	0.921	4.784	0.92417	4.816
AlO–	3.28	3-4 2Π		4.655	1.52	0.78	2.469	0.828	1.428	0.806	2.423	0.848	X	X	X	X	X	X	X	X	X	X	X	X	X	X	X	X	4.216	1	3.582	0.932091	4.944	1	4.247	0.945626	4.751	1	3.756	0.94514	4.079	0.945991	3.949	0.946316	4.754	1	3.733	0.96862	4.063
	2.57	5 2Σ		2.76	2.194	0.899	2.452	0.918	2.179	0.923	2.446	0.939	3.087	0.927	2.588	0.9398	2.937	0.913155	2.908	0.91482	3.099	0.961	2.585	0.9579	2.944	0.94868	2.914	0.948621	2.635	0.926	2.566	0.92183	2.689	0.926	2.619	0.92155	2.81	0.919	2.572	0.93058	2.752	0.91319	2.741	0.913274	2.811	0.949	2.567	0.95183	2.752
AlS–	3.27	3-4 2Π		3.812	2.808	0.848	3.132	0.888	2.779	0.873	3.118	0.907	3.724	0.896	3.319	0.890777	3.558	0.879514	3.531	0.8792	3.721	0.924	3.307	0.911626	3.55	0.907068	3.522	0.9067	3.196	0.881	3.144	0.87608	3.294	0.881	3.241	0.87521	3.359	0.878	3.203	0.878691	3.308	0.872724	3.296	0.872489	3.345	0.906	3.186	0.902417	3.293
	2.62	5 2Σ		2.804	2.43	0.898	2.646	0.921	2.42	0.923	2.642	0.942	2.748	0.899	2.555	0.91506	2.767	0.892747	2.74	0.89539	2.746	0.934	2.549	0.938307	2.765	0.931101	2.737	0.931761	2.524	0.902	2.513	0.901351	2.502	0.902	2.491	0.90152	2.655	0.894	2.557	0.907976	2.663	0.892107	2.659	0.89224	2.65	0.925	2.551	0.93251	2.658
BH4–	4.57	2-4 2T2		5.164	4.347	0.908	4.699	0.93	4.334	0.923	4.692	0.942	4.667	0.913	4.528	0.916685	4.699	0.909447	4.673	0.91032	4.656	0.933	4.517	0.932386	4.689	0.930253	4.662	0.930666	4.372	0.911	4.37	0.91071	4.358	0.911	4.355	0.91079	4.515	0.907	4.469	0.9098	4.532	0.90612	4.529	0.906054	4.503	0.925	4.456	0.926198	4.519
BO–	5.61	3-4 2Π		6.867	4.533	0.834	5.285	0.876	4.474	0.856	5.256	0.892	7.116	0.925	6.075	0.896425	6.499	0.888985	6.342	0.889412	7.122	0.947	6.061	0.912519	6.49	0.908675	6.331	0.90913	5.852	0.896	5.636	0.88302	6.18	0.894	5.959	0.881057	6.094	0.897	5.704	0.886618	5.876	0.88341	5.825	0.88359	6.075	0.919	5.679	0.905965	5.852
	2.42	5 2Σ		2.964	2.348	0.897	2.507	0.908	2.335	0.917	2.498	0.925	2.481	0.899	2.414	0.902593	2.522	0.894445	2.484	0.898021	2.466	0.928	2.401	0.92524	2.507	0.9258	2.468	0.92733	2.409	0.901	2.402	0.900855	2.321	0.902	2.315	0.90151	2.486	0.895	2.44	0.899614	2.502	0.89329	2.494	0.893707	2.473	0.92	2.428	0.92196	2.489
BS–	4.27	3-4 2Π		4.641	4.039	0.877	4.24	0.911	4.021	0.903	4.232	0.931	4.509	0.894	4.281	0.902374	4.444	0.889307	4.44	0.889348	4.504	0.922	4.272	0.924195	4.438	0.91719	4.434	0.917163	4.201	0.888	4.184	0.88636	4.264	0.887	4.247	0.885845	4.322	0.885	4.231	0.891806	4.307	0.88403	4.302	0.883876	4.312	0.913	4.22	0.915759	4.297
	2.27	5 2Σ		3.092	2.167	0.873	2.505	0.897	2.145	0.895	2.493	0.916	2.446	0.886	2.307	0.88513	2.406	0.87731	2.413	0.881541	2.424	0.917	2.286	0.9093	2.381	0.91026	2.391	0.91214	2.331	0.879	2.308	0.87824	2.211	0.881	2.188	0.879395	2.372	0.873	2.305	0.877168	2.369	0.871389	2.367	0.872059	2.35	0.901	2.283	0.901486	2.346
CH3–	0.25	4 2A1		0.683	-0.238	0.856	-0.062	0.875	-0.262	0.88	-0.078	0.895	0.513	0.897	0.162	0.89477	0.35	0.88441	0.363	0.884823	0.508	0.926	0.149	0.91637	0.34	0.91279	0.352	0.91294	0.176	0.887	0.121	0.882462	0.194	0.887	0.139	0.882303	0.277	0.883	0.121	0.88556	0.225	0.8785	0.221	0.878514	0.264	0.912	0.106	0.90951	0.211
Cl–	3.43	2-4 2Tu		4.096	2.905	0.883	3.287	0.915	2.884	0.9	3.276	0.927	3.852	0.931	3.494	0.922822	3.704	0.91745	3.683	0.91722	3.847	0.952	3.484	0.93871	3.695	0.93793	3.673	0.937616	3.349	0.92	3.297	0.91496	3.435	0.92	3.383	0.914652	3.52	0.917	3.377	0.9148	3.471	0.912313	3.461	0.91211	3.507	0.938	3.363	0.932533	3.457
CN–	3.73	3 2Σ		5.238	3.292	0.868	3.93	0.898	3.255	0.885	3.912	0.912	4.117	0.911	3.769	0.8971	3.788	0.89544	3.899	0.896188	4.093	0.931	3.743	0.913756	3.757	0.915312	3.871	0.9156	3.908	0.893	3.807	0.887596	3.777	0.893	3.677	0.888408	3.841	0.891	3.696	0.887831	3.743	0.886325	3.76	0.886496	3.812	0.91	3.667	0.905221	3.712
	4.95	4-5 2Π		5.23	4.548	0.861	4.838	0.9	4.526	0.89	4.829	0.922	5.266	0.922	4.865	0.912692	5.026	0.905524	5.079	0.905146	5.267	0.951	4.856	0.934474	5.02	0.93345	5.075	0.933329	5.141	0.902	5.06	0.89517	5.167	0.902	5.085	0.895089	5.088	0.904	4.881	0.905878	5.007	0.89772	5.005	0.897708	5.084	0.933	4.872	0.929418	5
CP–	2.74	3 2Σ		4.39	2.381	0.824	3.12	0.872	2.331	0.847	3.097	0.888	3.395	0.917	2.88	0.873286	2.773	0.874798	3.033	0.875999	3.367	0.943	2.845	0.8938	2.729	0.89901	2.997	0.900183	3.298	0.872	3.098	0.85765	3.032	0.874	2.837	0.86028	3.066	0.873	2.84	0.860398	2.872	0.85981	2.922	0.860065	3.031	0.898	2.803	0.88186	2.832
	3.62	4-5 2Π		3.455	3.484	0.866	3.521	0.904	3.485	0.904	3.523	0.933	3.549	0.909	3.481	0.88116	3.441	0.89911	3.533	0.89848	3.553	0.947	3.482	0.91432	3.44	0.936388	3.537	0.93645	3.738	0.891	3.706	0.887585	3.681	0.892	3.649	0.887857	3.631	0.895	3.467	0.944998	3.599	0.891212	3.608	0.890847	3.638	0.931	3.466	0.963899	3.604
F–	3.23	2-4 2Tu		4.931	1.025	0.836	2.272	0.876	0.962	0.851	2.241	0.887	6.612	1	4.322	0.9897	5.067	0.9917	4.638	0.991447	6.64	1	4.315	0.100198	5.069	0.1006	4.633	0.100626	3.786	0.997	3.261	0.959298	4.496	1	3.939	0.964445	4.41	1	3.598	0.963741	3.86	0.965245	3.747	0.96516	4.401	1	3.578	0.978202	3.842
HAlCl–	1.88	6 2A'		1.854	1.698	0.913	1.827	0.924	1.694	0.936	1.827	0.945	1.86	0.9	1.742	0.925146	1.995	0.893071	1.92	0.894027	1.86	0.935	1.739	0.9468	2.002	0.93505	1.923	0.93513	1.647	0.909	1.651	0.90979	1.632	0.91	1.636	0.90991	1.821	0.899	1.75	0.92213	1.859	0.897606	1.861	0.898048	1.819	0.931	1.748	0.94438	1.859
HAlP–	3.78	3 2Σ		4.309	3.195	0.819	3.638	0.87	3.159	0.848	3.622	0.891	4.42	0.932	3.774	0.88894	4.079	0.881501	4.063	0.881514	4.424	0.968	3.761	0.911358	4.07	0.913784	4.054	0.913497	3.786	0.888	3.677	0.872252	3.848	0.888	3.738	0.871981	3.925	0.887	3.669	0.874615	3.818	0.869915	3.805	0.869665	3.911	0.919	3.65	0.900527	3.8
	2.13	4-5 2Π		2.062	1.634	0.837	1.796	0.877	1.616	0.872	1.788	0.905	2.381	0.909	1.916	0.907099	2.211	0.88328	2.201	0.88322	2.395	0.949	1.912	0.931414	2.218	0.9216	2.207	0.92143	1.99	0.885	1.936	0.87665	2.07	0.885	2.015	0.876266	2.116	0.884	1.9	0.894039	2.062	0.874782	2.051	0.874509	2.118	0.922	1.895	0.922091	2.062
HBF–	0.48	6 2A'		0.793	0.194	0.874	0.344	0.883	0.179	0.897	0.334	0.903	0.505	0.876	0.362	0.887989	0.563	0.870815	0.529	0.87267	0.494	0.909	0.351	0.912392	0.554	0.9071	0.519	0.90788	0.255	0.884	0.25	0.883532	0.249	0.884	0.244	0.883603	0.432	0.874	0.362	0.882598	0.451	0.87213	0.448	0.87198	0.42	0.904	0.349	0.90813	0.439
HBN–	3.73	3 2Σ		5.86	2.199	0.79	3.462	0.842	2.126	0.808	3.428	0.856	6.465	1	4.211	0.92961	4.579	0.935401	4.537	0.93506	6.48	1	4.187	0.943474	4.553	0.9537	4.511	0.953683	4.518	0.954	3.929	0.897656	4.641	0.956	4.044	0.898293	4.608	0.957	3.83	0.897258	4.013	0.89957	3.989	0.899467	4.581	0.978	3.794	0.913312	3.975
	2.93	4-5 2Π		3.111	2.146	0.829	2.499	0.871	2.111	0.861	2.482	0.896	3.695	0.98	2.819	0.928708	3.167	0.921278	3.176	0.920993	3.716	1	2.812	0.95011	3.169	0.952307	3.178	0.952318	3.185	0.928	2.995	0.906075	3.291	0.929	3.098	0.906639	3.196	0.931	2.792	0.916536	3.005	0.909235	2.99	0.909276	3.199	0.965	2.783	0.941678	3.002
HCC–	2.9	3 2Σ		4.653	2.427	0.835	3.151	0.872	2.381	0.853	3.127	0.887	3.511	0.899	3.025	0.87402	3.081	0.872219	3.197	0.873545	3.482	0.923	2.992	0.89206	3.041	0.894528	3.161	0.8953	3.149	0.871	3.017	0.862266	3.005	0.872	2.874	0.863518	3.094	0.869	2.905	0.862195	2.967	0.860748	2.985	0.861043	3.057	0.891	2.868	0.881315	2.928
	3.32	4-5 2Π		3.419	2.966	0.859	3.189	0.898	2.95	0.889	3.183	0.921	3.52	0.921	3.163	0.911	3.317	0.903575	3.386	0.9038	3.524	0.954	3.156	0.93412	3.314	0.935363	3.385	0.935689	3.458	0.902	3.389	0.895196	3.428	0.902	3.359	0.895304	3.415	0.903	3.204	0.908957	3.346	0.896232	3.351	0.896207	3.415	0.935	3.199	0.932988	3.344
HCO–	0.43	6 2A'		1.181	-0.184	0.88	0.326	0.903	-0.216	0.901	0.31	0.92	0.823	0.917	0.392	0.91295	0.593	0.905151	0.606	0.905631	0.813	0.943	0.376	0.9324	0.577	0.930818	0.59	0.930898	0.377	0.909	0.299	0.904282	0.396	0.909	0.317	0.904201	0.489	0.905	0.307	0.904935	0.414	0.900354	0.41	0.900401	0.47	0.93	0.286	0.926453	0.394
HNB–	4.03	3-4 2Π		4.888	3.265	0.836	3.812	0.878	3.22	0.861	3.791	0.896	4.894	0.909	4.163	0.8907	4.472	0.88175	4.433	0.881744	4.895	0.935	4.148	0.909537	4.461	0.905863	4.42	0.905894	4.141	0.885	4.001	0.87483	4.641	0.956	4.044	0.898293	4.266	0.884	3.979	0.879233	4.124	0.874438	4.103	0.874466	4.248	0.91	3.956	0.901094	4.103
	1.74	5 2Σ		2.409	1.616	0.877	1.821	0.891	1.597	0.898	1.809	0.91	1.883	0.888	1.754	0.889531	1.9	0.880515	1.874	0.884107	1.866	0.918	1.737	0.912958	1.882	0.91314	1.856	0.9149	1.713	0.886	1.701	0.88527	3.291	0.929	1.633	0.906639	1.809	0.88	1.748	0.883435	1.82	0.87755	1.814	0.877987	1.791	0.907	1.73	0.907284	1.801
HNF–	4.08	6 2A'		5.406	2.963	0.858	3.888	0.896	2.914	0.877	3.865	0.911	5.058	0.939	4.217	0.91308	4.538	0.909228	4.486	0.90914	5.051	0.96	4.197	0.928752	4.519	0.92918	4.466	0.92903	4.065	0.914	3.889	0.90302	4.219	0.914	4.042	0.902608	4.267	0.913	3.944	0.903202	4.089	0.901482	4.066	0.901411	4.241	0.933	3.915	0.921124	4.061
	1.01	7 2A''		2.47	0.191	0.861	0.898	0.89	0.145	0.88	0.874	0.904	1.669	0.928	1.094	0.90787	1.263	0.905732	1.286	0.905855	1.65	0.949	1.068	0.924817	1.236	0.926076	1.26	0.926126	1.075	0.908	0.94	0.89918	1.102	0.908	0.967	0.8991	1.155	0.906	0.925	0.898949	1.021	0.897767	1.015	0.89777	1.125	0.927	0.894	0.917668	0.988
HOO–	1.91	6 2A'		3.966	0.576	0.841	1.74	0.881	0.512	0.858	1.709	0.894	3.391	0.954	2.256	0.90812	2.555	0.907152	2.494	0.907026	3.38	0.972	2.23	0.92194	2.529	0.92366	2.467	0.923605	2.136	0.913	1.853	0.896521	2.305	0.913	2.02	0.896142	2.288	0.914	1.867	0.897012	2.003	0.896779	1.975	0.896744	2.256	0.931	1.831	0.913002	1.966
	1.32	7 2A''		3.254	-0.187	0.843	0.99	0.884	-0.253	0.861	0.959	0.897	2.762	0.951	1.584	0.908815	1.916	0.907288	1.822	0.90719	2.753	0.969	1.558	0.922678	1.892	0.923751	1.796	0.92372	1.397	0.912	1.112	0.896849	1.617	0.912	1.328	0.896351	1.583	0.913	1.151	0.8978	1.295	0.897348	1.259	0.897333	1.551	0.931	1.114	0.913962	1.257
HPAl–	2.27	4 2A''		2.46	2.031	0.861	2.158	0.893	2.016	0.89	2.15	0.916	2.419	0.878	2.198	0.890344	2.372	0.87139	2.372	0.87215	2.418	0.913	2.191	0.915682	2.368	0.90681	2.369	0.90713	2.165	0.873	2.15	0.871404	2.186	0.873	2.171	0.87116	2.283	0.868	2.183	0.879756	2.273	0.866016	2.27	0.865863	2.276	0.901	2.174	0.907271	2.266
	2.07	5 2A'		2.243	1.857	0.886	2.074	0.914	1.846	0.913	2.07	0.936	2.157	0.89	1.976	0.904175	2.163	0.883874	2.144	0.8864	2.154	0.927	1.969	0.92921	2.16	0.92275	2.14	0.923625	1.948	0.891	1.938	0.890481	1.922	0.891	1.911	0.890731	2.068	0.883	1.977	0.896755	2.074	0.881786	2.07	0.881919	2.062	0.916	1.97	0.923081	2.068
HPCl–	4.47	6 2A'		5.177	4.144	0.882	4.587	0.916	4.121	0.903	4.577	0.932	4.696	0.897	4.457	0.89942	4.634	0.890436	4.629	0.891215	4.682	0.923	4.441	0.919566	4.619	0.916884	4.613	0.917105	4.326	0.892	4.304	0.89046	4.333	0.892	4.312	0.890405	4.469	0.887	4.379	0.890222	4.458	0.885319	4.454	0.88525	4.45	0.911	4.36	0.911701	4.438
	1.43	7 2A''		1.836	1.184	0.895	1.423	0.918	1.169	0.917	1.416	0.936	1.544	0.905	1.369	0.91041	1.511	0.899951	1.51	0.901247	1.535	0.933	1.358	0.932265	1.501	0.92932	1.5	0.929878	1.312	0.903	1.297	0.9017	1.295	0.903	1.28	0.901816	1.428	0.897	1.35	0.902938	1.425	0.896004	1.422	0.89605	1.416	0.924	1.338	0.926012	1.412
HSiS–	3.88	5 2A"		4.221	3.527	0.866	3.75	0.9	3.505	0.894	3.739	0.921	4.128	0.888	3.836	0.8959	4.032	0.880924	4.025	0.880981	4.125	0.919	3.826	0.919136	4.026	0.911613	4.018	0.911527	3.755	0.88	3.728	0.878436	3.824	0.88	3.797	0.87781	3.892	0.877	3.775	0.88395	3.867	0.874983	3.86	0.874807	3.881	0.907	3.762	0.909817	3.855
	2.16	6 2A'		2.541	1.827	0.888	2.171	0.918	1.808	0.911	2.163	0.937	2.32	0.901	2.073	0.9076	2.268	0.894251	2.261	0.895498	2.313	0.931	2.062	0.92966	2.258	0.92554	2.252	0.92589	2	0.898	1.978	0.8962	1.999	0.898	1.977	0.896209	2.137	0.892	2.033	0.89811	2.127	0.889868	2.123	0.88985	2.124	0.92	2.02	0.9219	2.114
HSiSi–	2.29	4 2A"		2.082	2.062	0.861	2.129	0.898	2.061	0.901	2.131	0.929	2.232	0.884	2.068	0.89558	2.174	0.876011	2.206	0.87866	2.24	0.931	2.068	0.926434	2.178	0.922458	2.213	0.924325	2.206	0.875	2.187	0.872681	2.162	0.875	2.143	0.873109	2.235	0.872	2.075	0.923863	2.22	0.869632	2.222	0.869876	2.242	0.915	2.074	0.94843	2.227
	2.25	5 2A'		2.003	2.079	0.865	2.107	0.9	2.082	0.906	2.111	0.932	2.206	0.886	2.058	0.90244	2.159	0.87899	2.189	0.881587	2.217	0.933	2.06	0.9318	2.168	0.92609	2.198	0.928012	2.202	0.878	2.186	0.875881	2.164	0.878	2.148	0.876223	2.23	0.875	2.015	0.99372	2.219	0.873193	2.22	0.873404	2.242	0.919	2.013	0.10056	2.229
HSS–	2.61	6 2A'		3.295	2.153	0.876	2.583	0.91	2.128	0.897	2.571	0.926	2.933	0.909	2.596	0.9051	2.782	0.89773	2.78	0.898051	2.923	0.934	2.581	0.92437	2.768	0.922674	2.766	0.9227	2.5	0.898	2.453	0.89465	2.534	0.898	2.487	0.894436	2.63	0.895	2.499	0.895239	2.587	0.891182	2.582	0.891085	2.612	0.919	2.481	0.916355	2.569
	1.84	7 2A''		2.425	1.379	0.883	1.79	0.916	1.354	0.904	1.779	0.932	2.104	0.91	1.786	0.90934	1.971	0.901063	1.969	0.901411	2.095	0.936	1.772	0.929	1.958	0.926762	1.957	0.9268	1.693	0.902	1.652	0.898686	1.726	0.901	1.685	0.8985	1.825	0.898	1.7	0.899747	1.789	0.895087	1.783	0.894999	1.809	0.923	1.683	0.921379	1.771
NH2–	0.54	4 2B1		1.308	-0.501	0.838	-0.023	0.869	-0.548	0.862	-0.049	0.887	1.524	0.953	0.634	0.914671	0.964	0.909164	0.906	0.9091	1.53	0.978	0.621	0.93282	0.956	0.932238	0.896	0.932305	0.646	0.916	0.448	0.900193	0.813	0.916	0.613	0.899867	0.8	0.917	0.44	0.903138	0.599	0.900197	0.573	0.900226	0.786	0.942	0.42	0.924682	0.58
OCl–	2.23	6-7 2Π		3.871	1.324	0.86	2.243	0.899	1.272	0.879	2.219	0.913	3.456	0.939	2.587	0.911824	2.858	0.908526	2.817	0.908446	3.447	0.959	2.565	0.92706	2.837	0.927311	2.795	0.92724	2.486	0.911	2.286	0.900548	2.614	0.911	2.412	0.90011	2.623	0.911	2.295	0.901558	2.421	0.90007	2.4	0.900037	2.596	0.931	2.265	0.919055	2.39
OF–	2.42	6-7 2Π		4.693	1.311	0.854	2.464	0.892	1.254	0.87	2.437	0.903	3.6	0.941	2.74	0.909511	2.935	0.908824	2.934	0.90879	3.581	0.958	2.712	0.92281	2.905	0.924331	2.904	0.92432	2.661	0.911	2.437	0.89974	2.737	0.911	2.512	0.899543	2.746	0.911	2.42	0.899718	2.521	0.899502	2.509	0.89948	2.712	0.928	2.384	0.914635	2.483
OH–	1.63	3-4 2π		2.945	-0.166	0.823	0.785	0.863	-0.234	0.842	0.751	0.878	4.212	1	2.259	0.959032	2.867	0.959052	2.587	0.959093	4.239	1	2.248	0.973878	2.865	0.977571	2.581	0.97767	2.103	0.971	1.64	0.93384	2.578	0.977	2.095	0.936508	2.491	0.979	1.773	0.937504	2.014	0.93798	1.933	0.938014	2.481	1	1.75	0.955461	1.994
PH2–	1.04	4 2B1		1.214	0.81	0.891	0.894	0.91	0.8	0.914	0.888	0.929	1.106	0.897	0.946	0.90906	1.101	0.8932	1.094	0.894139	1.102	0.927	0.94	0.9309	1.097	0.9239	1.09	0.924373	0.888	0.897	0.881	0.89649	0.891	0.897	0.883	0.89647	1.021	0.891	0.943	0.901611	1.024	0.890077	1.022	0.890004	1.015	0.919	0.936	0.924916	1.018
SCl–	2.5	6-7 2Π		3.232	2.114	0.885	2.545	0.917	2.09	0.905	2.534	0.932	2.76	0.912	2.486	0.908877	2.637	0.90253	2.646	0.903188	2.747	0.936	2.47	0.92805	2.621	0.927016	2.63	0.927277	2.414	0.903	2.375	0.9002	2.416	0.903	2.378	0.900184	2.524	0.899	2.414	0.900184	2.491	0.896494	2.488	0.896489	2.506	0.923	2.396	0.920777	2.472
SF–	2.3	6-7 2Π		2.983	1.941	0.891	2.312	0.918	1.92	0.91	2.302	0.932	2.531	0.918	2.297	0.916135	2.44	0.91035	2.446	0.91107	2.519	0.942	2.283	0.93468	2.426	0.934219	2.433	0.934521	2.237	0.913	2.204	0.910344	2.239	0.913	2.205	0.910335	2.355	0.909	2.253	0.909519	2.329	0.906066	2.326	0.906063	2.34	0.932	2.238	0.929291	2.313
SH–	2.12	3-4 2Π		2.576	1.699	0.878	1.966	0.908	1.679	0.898	1.956	0.923	2.39	0.915	2.093	0.912303	2.288	0.90377	2.28	0.903917	2.385	0.94	2.083	0.931028	2.28	0.928755	2.272	0.928673	2.008	0.906	1.972	0.9026	2.053	0.906	2.017	0.90233	2.155	0.903	2.031	0.903541	2.124	0.89864	2.118	0.898461	2.144	0.927	2.018	0.924221	2.112
SiH3–	1.72	4 2A'		1.831	1.521	0.903	1.632	0.917	1.513	0.924	1.628	0.936	1.737	0.902	1.608	0.915889	1.812	0.89723	1.769	0.89867	1.734	0.933	1.602	0.9373	1.811	0.930928	1.767	0.93167	1.51	0.906	1.511	0.905853	1.5	0.906	1.501	0.905928	1.674	0.898	1.609	0.91026	1.699	0.897163	1.698	0.896976	1.669	0.927	1.603	0.93276	1.695
SiN–	2.91	3 2Σ		2.927	1.966	0.764	2.277	0.819	1.911	0.811	2.249	0.855	4.449	1	2.763	0.93499	3.207	0.930249	3.218	0.92895	4.523	1	2.756	0.961747	3.219	0.9691	3.231	0.96916	3.692	0.958	3.234	0.890568	3.881	0.966	3.407	0.893436	3.515	0.969	2.773	0.91346	3.083	0.902189	3.051	0.902336	3.543	1	2.768	0.944912	3.091
	3.13	4-5 2Π		4.193	1.938	0.794	2.794	0.851	1.866	0.823	2.762	0.872	5.597	1	3.296	0.953854	3.521	0.961587	3.65	0.960919	5.649	1	3.278	0.972867	3.502	0.988704	3.633	0.988936	4.229	1	3.528	0.922209	4.222	1	3.522	0.922123	4.078	1	3.201	0.923064	3.392	0.92533	3.401	0.9251	4.074	1	3.176	0.94548	3.368
SiP–	2.94	3 2Σ		3.586	2.754	0.854	3.13	0.898	2.727	0.883	3.12	0.919	3.303	0.901	2.999	0.888608	3.077	0.883002	3.158	0.884467	3.292	0.934	2.983	0.913879	3.059	0.91545	3.142	0.916399	3.156	0.881	3.086	0.875084	3.07	0.881	3	0.875876	3.138	0.879	2.993	0.879274	3.072	0.873365	3.082	0.87361	3.123	0.91	2.976	0.905844	3.054
	2.94	4-5 2Π		2.65	2.574	0.852	2.627	0.892	2.57	0.893	2.626	0.923	2.869	0.89	2.61	0.907439	2.77	0.87928	2.806	0.87977	2.88	0.933	2.608	0.934782	2.776	0.921345	2.813	0.921914	2.785	0.874	2.757	0.87068	2.799	0.874	2.771	0.870573	2.81	0.875	2.627	0.92064	2.782	0.871176	2.78	0.871142	2.818	0.916	2.626	0.945505	2.789
	Statistics for signed deviations from CCST(T) All 55 VEDEs.			KT	D2	os-D2	nD-D2	os-nD-D2	D3	OVGF-A	OVGF-B	OVGF-C	nD-D3	nD-OVGF-A	nD-OVGF-B	nD-OVGF-C	P3	P3+	Q3	Q3+	L3	L3+A	L3+B	L3+C	nD-L3	nD-L3+A	nD-L3+B	nD-L3+C	DR	RP3	RQ3	RL3	nD-RL3	ND2	2ph-TDA	3+	NR2	BD-T1	ADC(3)	NRP3	NRQ3	NRL3
				0.710927	-0.584491	-0.132764	-0.614982	-0.147436	0.599111	0.0442963	0.259981	0.247796	0.597704	0.0312778	0.24937	0.237148	0.0835818	-0.0438727	0.179691	0.0111273	0.192818	-0.0521455	0.0708727	0.0586909	0.180709	-0.0688182	0.0556364	0.0432727	-0.117455	-0.155491	-0.102018	-0.0305455	-0.0402364	-0.558636	-0.5252	0.279491	-0.170927	0.121945	0.168685	-0.171436	-0.112545	-0.0216727
				0.655501	0.489826	0.270039	0.509262	0.275444	0.764652	0.241224	0.340076	0.276269	0.773542	0.237788	0.338915	0.272458	0.302919	0.158408	0.449264	0.235638	0.326893	0.140959	0.1663	0.147879	0.320048	0.123977	0.15597	0.134595	0.268792	0.133663	0.167073	0.128554	0.10194	0.252562	0.267861	0.384989	0.119116	0.100602	0.223015	0.118261	0.147359	0.0827153
	Statistics for absolute deviations from CCST(T) All 55 VEDEs.			KT	D2	os-D2	nD-D2	os-nD-D2	D3	OVGF-A	OVGF-B	OVGF-C	nD-D3	nD-OVGF-A	nD-OVGF-B	nD-OVGF-C	P3	P3+	Q3	Q3+	L3	L3+A	L3+B	L3+C	nD-L3	nD-L3+A	nD-L3+B	nD-L3+C	DR	RP3	RQ3	RL3	nD-RL3	ND2	2ph-TDA	3+	NR2	BD-T1	ADC(3)	NRP3	NRQ3	NRL3
				0.754818	0.585691	0.208145	0.615891	0.215291	0.608889	0.155667	0.280685	0.261352	0.606222	0.152463	0.269926	0.249704	0.207073	0.1322	0.293691	0.161564	0.2106	0.116655	0.0974909	0.0901091	0.201327	0.1146	0.0901455	0.0816	0.196691	0.185164	0.169945	0.0993455	0.0897636	0.558636	0.5252	0.314218	0.186273	0.126891	0.202592	0.186018	0.164182	0.0633091
				2.273	2.205	0.958	2.268	0.989	3.382	1.092	1.837	1.408	3.41	1.085	1.839	1.403	1.319	0.618	1.664	0.967	1.471	0.476	0.799	0.669	1.474	0.453	0.783	0.649	1.162	0.358	0.437	0.437	0.321	1.204	1.189	1.613	0.401	0.504	0.825864	0.403	0.408	0.309
[truncated: 109 more columns]

## Sheet: aTZ-VEDEs
				CCSD(T)/ aug-cc-pVTZ Versus EPT/ aug-cc-pVTZ
Anions	CCSD(T) VEDE	Final State		KT	D2	PS(D2)	os-D2	PS(os-D2)	nD-D2	PS(nD-D2)	os-nD-D2	PS(os-nD-D2)	D3	PS(D3)	OVGF-A	PS(OVGF-A)	OVGF-B	PS(OVGF-B)	OVGF-C	PS(OVGF-C)	nD-D3	PS(nD-D3)	nD-OVGF-A	PS(nD-OVGF-A)	nD-OVGF-B	PS(nD-OVGF-B)	nD-OVGF-C	PS(nD-OVGF-C)	P3	PS(P3)	P3+	PS(P3+)	Q3	PS(Q3)	Q3+	PS(Q3+)	L3	PS(L3)	L3+A	PS(L3+A)	L3+B	PS(L3+B)	L3+C	PS(L3+C)	nD-L3	PS(nD-L3)	nD-L3+A	PS(nD-L3+A)	nD-L3+B
AlH4–	4.88	2-4 2T2		5.395	4.966	0.921	5.175	0.934	4.959	0.935	5.172	0.947	4.957	0.904	4.962	0.912139	5.082	0.902975	4.948	0.88268	4.948	0.924	4.954	0.928806	5.074	0.92479	4.935	0.907754	4.779	0.907	4.79	0.908229	4.753	0.908	4.764	0.90841	4.907	0.902	4.927	0.906546	4.944	0.902728	4.937	0.903873	4.898	0.92	4.919	0.92333	4.935
AlO–	3.37	3-4 2Π		4.669	1.733	0.776	2.643	0.825	1.644	0.803	2.598	0.845	7.442	1	4.01	0.107207	4.909	0.108405	4.531	0.108515	X	X	X	X	X	X	X	X	4.485	1	3.823	0.935441	5.042	1	4.329	0.947022	4.822	1	3.789	0.945302	4.135	0.947123	4.036	0.947439	4.827	1	3.768	0.96878	4.119
	2.65	5 2Σ		2.752	2.306	0.897	2.551	0.915	2.294	0.922	2.546	0.937	3.133	0.928	2.606	0.941658	2.973	0.91313	2.959	0.915275	3.147	0.962	2.603	0.958915	2.982	0.948969	2.967	0.94914	2.759	0.925	2.686	0.920085	2.779	0.925	2.705	0.919982	2.879	0.919	2.612	0.93442	2.816	0.913175	2.808	0.913389	2.883	0.95	2.609	0.954186	2.818
AlS–	3.34	3-4 2Π		3.803	2.963	0.841	3.255	0.883	2.939	0.868	3.242	0.903	3.741	0.891	3.329	0.885996	3.575	0.874471	3.581	0.874847	3.739	0.923	3.318	0.908176	3.567	0.904529	3.573	0.904724	3.341	0.875	3.288	0.869423	3.365	0.875	3.312	0.869196	3.436	0.873	3.267	0.87449	3.386	0.867101	3.382	0.867026	3.423	0.902	3.251	0.899201	3.373
	2.69	5 2Σ		2.796	2.538	0.894	2.741	0.917	2.53	0.92	2.739	0.94	2.802	0.898	2.611	0.912861	2.818	0.891024	2.791	0.894625	2.802	0.934	2.606	0.936375	2.819	0.930132	2.791	0.93142	2.64	0.898	2.626	0.897414	2.587	0.899	2.574	0.897835	2.725	0.892	2.619	0.908865	2.731	0.89003	2.726	0.890365	2.722	0.924	2.615	0.932902	2.728
BH4–	4.65	2-4 2T2		5.187	4.498	0.905	4.837	0.928	4.486	0.921	4.832	0.941	4.723	0.912	4.608	0.914377	4.747	0.908653	4.722	0.91044	4.713	0.932	4.598	0.930631	4.737	0.929837	4.712	0.930967	4.531	0.909	4.528	0.908424	4.472	0.909	4.469	0.908752	4.607	0.906	4.57	0.908032	4.62	0.904851	4.614	0.905052	4.595	0.924	4.559	0.92477	4.608
BO–	5.68	3-4 2Π		6.857	4.711	0.829	5.425	0.872	4.655	0.852	5.398	0.889	7.094	0.928	6.031	0.89625	6.44	0.888981	6.361	0.889094	7.099	0.95	6.016	0.912588	6.431	0.909293	6.349	0.909529	6.07	0.894	5.841	0.880503	6.278	0.894	6.046	0.879285	6.169	0.897	5.755	0.885733	5.939	0.882255	5.907	0.882386	6.152	0.919	5.731	0.905159	5.917
	2.52	5 2Σ		2.972	2.488	0.895	2.632	0.906	2.477	0.915	2.625	0.924	2.577	0.902	2.524	0.901604	2.601	0.896644	2.575	0.90106	2.564	0.931	2.513	0.924264	2.588	0.927796	2.563	0.929974	2.57	0.902	2.561	0.900809	2.456	0.902	2.447	0.901589	2.594	0.896	2.55	0.90047	2.603	0.89492	2.597	0.895684	2.584	0.922	2.539	0.922545	2.592
BS–	4.36	3-4 2Π		4.634	4.21	0.871	4.376	0.907	4.197	0.899	4.37	0.928	4.558	0.89	4.339	0.89732	4.492	0.884902	4.508	0.885572	4.555	0.921	4.332	0.92079	4.487	0.915178	4.504	0.915698	4.367	0.882	4.349	0.880386	4.363	0.882	4.345	0.880413	4.425	0.881	4.327	0.889175	4.41	0.879041	4.409	0.879035	4.418	0.91	4.318	0.914067	4.403
	2.38	5 2Σ		3.086	2.301	0.869	2.625	0.894	2.281	0.892	2.615	0.913	2.526	0.887	2.398	0.882386	2.471	0.877001	2.496	0.881982	2.507	0.918	2.379	0.907093	2.448	0.910473	2.475	0.913002	2.484	0.877	2.456	0.875605	2.326	0.879	2.298	0.877077	2.468	0.873	2.402	0.875673	2.458	0.870456	2.46	0.871392	2.448	0.901	2.383	0.900276	2.438
CH3–	0.36	4 2A1		0.713	-0.077	0.844	0.066	0.863	-0.1	0.869	0.051	0.883	0.611	0.909	0.238	0.895188	0.413	0.88965	0.46	0.890252	0.607	0.939	0.227	0.9171	0.403	0.919065	0.451	0.919418	0.417	0.893	0.347	0.885399	0.367	0.893	0.297	0.885658	0.423	0.891	0.239	0.889297	0.356	0.88327	0.36	0.883376	0.413	0.92	0.226	0.913273	0.344
Cl–	3.51	2-4 2Tu		4.091	3.079	0.876	3.416	0.909	3.057	0.896	3.405	0.924	3.879	0.927	3.505	0.917897	3.734	0.912772	3.74	0.913263	3.874	0.951	3.494	0.935416	3.725	0.936194	3.732	0.936474	3.501	0.915	3.449	0.909576	3.51	0.915	3.458	0.909549	3.609	0.913	3.448	0.910435	3.562	0.907329	3.559	0.907289	3.597	0.936	3.435	0.929651	3.549
CN–	3.87	3 2Σ		5.257	3.492	0.864	4.11	0.896	3.457	0.882	4.093	0.91	4.221	0.912	3.836	0.895151	3.862	0.895058	4.021	0.895944	4.198	0.933	3.851	0.91237	3.83	0.915556	3.994	0.916062	4.142	0.891	4.031	0.885425	3.941	0.892	3.831	0.886642	3.985	0.891	3.835	0.88643	3.878	0.885335	3.907	0.885504	3.958	0.91	3.807	0.904181	3.848
	5.05	4-5 2Π		5.226	4.74	0.857	4.992	0.897	4.724	0.887	4.986	0.92	5.288	0.923	4.919	0.906532	5.023	0.905303	5.139	0.90443	5.29	0.953	4.911	0.929165	5.016	0.93392	5.136	0.93355	5.364	0.901	5.274	0.893403	5.296	0.901	5.207	0.893604	5.189	0.904	4.964	0.906467	5.099	0.89707	5.113	0.896773	5.188	0.933	4.958	0.929472	5.095
CP–	2.86	3 2Σ		4.382	2.516	0.817	3.245	0.866	2.466	0.841	3.222	0.884	3.473	0.917	2.944	0.867809	2.811	0.871766	3.125	0.873254	3.446	0.945	2.91	0.889269	2.766	0.89715	3.089	0.898728	3.47	0.868	3.256	0.852628	3.137	0.871	2.928	0.855955	3.162	0.871	2.922	0.855971	2.954	0.856182	3.02	0.856397	3.128	0.896	2.886	0.8781	2.915
	3.71	4-5 2Π		3.44	3.627	0.86	3.636	0.899	3.636	0.899	3.643	0.93	3.594	0.908	3.638	0.831253	3.469	0.89678	3.603	0.896115	3.601	0.948	3.648	0.871851	3.47	0.93578	3.61	0.936181	3.899	0.888	3.861	0.883964	3.779	0.889	3.743	0.88448	3.72	0.893	3.51	0.996885	3.682	0.888609	3.704	0.887594	3.732	0.931	3.505	0.100938	3.692
F–	3.31	2-4 2Tu		4.924	1.215	0.83	2.418	0.871	1.151	0.846	2.387	0.883	6.753	1	4.244	0.10115	5.018	0.10171	4.681	0.101691	6.787	1	4.234	0.102473	5.019	0.10337	4.677	0.103357	4.147	1	3.562	0.972356	4.709	1	4.093	0.979093	4.591	1	3.685	0.976418	3.984	0.979568	3.894	0.979556	4.585	1	3.666	0.991454	3.968
HAlCl–	1.96	6 2A'		1.852	1.819	0.91	1.937	0.921	1.818	0.934	1.939	0.944	1.938	0.9	1.826	0.925769	2.071	0.893498	1.975	0.895949	1.941	0.937	1.826	0.946747	2.081	0.935959	1.98	0.936799	1.78	0.907	1.783	0.907644	1.743	0.908	1.746	0.907924	1.912	0.899	1.83	0.932062	1.947	0.897497	1.941	0.897343	1.914	0.931	1.83	0.951488	1.951
HAlP–	3.84	3 2Σ		4.278	3.308	0.812	3.734	0.864	3.275	0.842	3.719	0.887	4.423	0.928	3.761	0.882048	4.077	0.876091	4.098	0.877066	4.429	0.966	3.747	0.905399	4.069	0.910568	4.091	0.911235	3.903	0.883	3.79	0.865696	3.894	0.882	3.781	0.865733	3.97	0.882	3.696	0.869323	3.862	0.864356	3.859	0.864345	3.958	0.916	3.678	0.895826	3.846
	2.2	4-5 2Π		2.063	1.763	0.83	1.904	0.872	1.75	0.866	1.899	0.9	2.407	0.906	1.932	0.900647	2.229	0.878617	2.251	0.879385	2.423	0.949	1.928	0.925507	2.237	0.91893	2.259	0.919602	2.125	0.88	2.067	0.87052	2.141	0.88	2.083	0.870446	2.185	0.88	1.94	0.894549	2.128	0.869833	2.125	0.869755	2.19	0.919	1.937	0.921707	2.131
HBF–	0.58	6 2A'		0.817	0.337	0.865	0.468	0.873	0.325	0.888	0.46	0.893	0.614	0.886	0.46	0.889381	0.655	0.877745	0.622	0.881894	0.607	0.92	0.451	0.913376	0.649	0.914574	0.614	0.91724	0.452	0.89	0.442	0.887453	0.407	0.89	0.397	0.887763	0.567	0.882	0.479	0.887844	0.577	0.878518	0.573	0.878903	0.558	0.913	0.47	0.912659	0.569
HBN–	3.82	3 2Σ		5.83	2.352	0.784	3.592	0.838	2.279	0.803	3.558	0.852	6.468	1	4.172	0.926133	4.51	0.935119	4.576	0.934919	6.485	1	4.146	0.940528	4.483	0.954557	4.55	0.954749	4.746	0.958	4.123	0.89699	4.736	0.958	4.114	0.896929	4.685	0.959	3.871	0.894987	4.064	0.898657	4.069	0.898566	4.659	0.981	3.835	0.911518	4.027
	3.02	4-5 2Π		3.116	2.309	0.824	2.633	0.868	2.279	0.856	2.62	0.893	3.702	0.982	2.818	0.924476	3.141	0.920602	3.221	0.919918	3.724	1	2.811	0.94579	3.142	0.952242	3.225	0.95208	3.393	0.93	3.188	0.905382	3.402	0.93	3.197	0.905444	3.277	0.932	2.839	0.916755	3.074	0.908677	3.076	0.90855	3.283	0.966	2.832	0.941152	3.073
HCC–	3.05	3 2Σ		4.671	2.616	0.83	3.323	0.869	2.571	0.85	3.3	0.885	3.604	0.902	3.118	0.872107	3.137	0.872271	3.307	0.873886	3.576	0.926	3.085	0.890675	3.098	0.895159	3.273	0.89629	3.381	0.87	3.234	0.860028	3.16	0.871	3.016	0.861895	3.229	0.87	3.033	0.860806	3.089	0.860054	3.122	0.86039	3.194	0.892	2.997	0.880233	3.051
	3.41	4-5 2Π		3.417	3.14	0.855	3.329	0.894	3.13	0.886	3.327	0.918	3.539	0.924	3.229	0.901326	3.313	0.904491	3.436	0.90462	3.543	0.958	3.224	0.925505	3.31	0.937044	3.437	0.937484	3.662	0.903	3.585	0.894692	3.546	0.903	3.471	0.894969	3.505	0.905	3.277	0.91093	3.428	0.8969	3.446	0.896673	3.508	0.937	3.274	0.933875	3.428
HCO–	0.57	6 2A'		1.212	0.044	0.876	0.524	0.899	0.016	0.898	0.511	0.917	0.933	0.92	0.495	0.91273	0.681	0.906353	0.731	0.907042	0.925	0.947	0.479	0.932339	0.665	0.932683	0.717	0.932882	0.637	0.909	0.55	0.903899	0.584	0.909	0.498	0.904079	0.654	0.907	0.456	0.905767	0.571	0.901137	0.576	0.901263	0.639	0.932	0.438	0.927177	0.554
HNB–	4.12	3-4 2Π		4.895	3.45	0.831	3.965	0.874	3.408	0.856	3.945	0.894	4.898	0.912	4.169	0.889763	4.447	0.8823	4.474	0.882141	4.898	0.939	4.154	0.908939	4.435	0.907024	4.462	0.906995	4.746	0.958	4.123	0.89699	4.395	0.883	4.243	0.872519	4.354	0.885	4.053	0.878794	4.202	0.874001	4.198	0.873989	4.339	0.911	4.033	0.900667	4.183
	1.84	5 2Σ		2.418	1.756	0.874	1.947	0.889	1.74	0.896	1.937	0.908	1.977	0.893	1.853	0.889628	1.974	0.884012	1.961	0.888656	1.962	0.923	1.839	0.912966	1.958	0.916451	1.946	0.919091	3.393	0.93	3.188	0.905381	1.781	0.889	1.765	0.887124	1.918	0.883	1.855	0.885118	1.92	0.880532	1.916	0.881419	1.903	0.91	1.841	0.908663	1.904
HNF–	4.18	6 2A'		5.4	3.166	0.854	4.06	0.893	3.118	0.873	4.039	0.908	5.115	0.945	4.241	0.913884	4.55	0.911389	4.562	0.911466	5.108	0.968	4.221	0.929875	4.53	0.932089	4.543	0.932121	4.327	0.916	4.134	0.903316	4.375	0.916	4.181	0.903235	4.4	0.915	4.049	0.904012	4.207	0.902735	4.198	0.902726	4.377	0.937	4.022	0.922135	4.18
	1.16	7 2A''		2.487	0.433	0.856	1.107	0.886	0.389	0.876	1.084	0.901	1.79	0.934	1.189	0.908075	1.342	0.907742	1.424	0.907979	1.774	0.956	1.164	0.9255	1.316	0.928985	1.4	0.929177	1.374	0.91	1.223	0.899678	1.307	0.91	1.157	0.899805	1.342	0.909	1.087	0.899728	1.193	0.899147	1.201	0.899185	1.315	0.931	1.058	0.91878	1.163
HOO–	2.04	6 2A'		3.965	0.798	0.836	1.926	0.878	0.736	0.854	1.896	0.891	3.477	0.962	2.295	0.909237	2.578	0.90961	2.598	0.909484	3.467	0.981	2.269	0.923515	2.552	0.9269	2.572	0.926922	2.429	0.916	2.124	0.897012	2.48	0.916	2.179	0.896945	2.448	0.917	1.994	0.89769	2.142	0.898051	2.134	0.898024	2.418	0.935	1.958	0.914061	2.106
	1.46	7 2A''		3.269	0.065	0.839	1.204	0.88	0	0.857	1.173	0.894	2.858	0.958	1.634	0.90939	1.951	0.908914	1.942	0.908756	2.85	0.977	1.608	0.923673	1.926	0.926111	1.916	0.926113	1.719	0.914	1.411	0.896553	1.817	0.914	1.508	0.896406	1.763	0.915	1.298	0.897892	1.454	0.897871	1.438	0.897851	1.733	0.934	1.218	0.914392	1.418
HPAl–	2.37	4 2A''		2.465	2.192	0.854	2.294	0.888	2.182	0.885	2.29	0.913	2.486	0.876	2.274	0.884968	2.437	0.868126	2.45	0.870124	2.487	0.913	2.268	0.91134	2.436	0.905601	2.449	0.906965	2.335	0.868	2.317	0.866015	2.298	0.868	2.28	0.866444	2.392	0.864	2.28	0.879985	2.382	0.862153	2.382	0.862346	2.389	0.899	2.274	0.907285	2.379
	2.16	5 2A'		2.24	1.982	0.88	2.185	0.909	1.974	0.909	2.184	0.932	2.22	0.888	2.046	0.900372	2.228	0.881379	2.208	0.88514	2.219	0.926	2.041	0.925994	2.227	0.92156	2.207	0.923316	2.082	0.887	2.069	0.885901	2.018	0.887	2.005	0.886508	2.153	0.881	2.055	0.896821	2.157	0.878995	2.153	0.879413	2.15	0.915	2.05	0.922842	2.154
HPCl–	4.58	6 2A'		5.174	4.319	0.876	4.739	0.91	4.298	0.898	4.731	0.928	4.782	0.894	4.538	0.89521	4.72	0.886253	4.726	0.888111	4.77	0.922	4.523	0.916649	4.706	0.915011	4.712	0.916029	4.509	0.887	4.485	0.884929	4.455	0.887	4.431	0.885353	4.593	0.883	4.496	0.886451	4.582	0.880647	4.581	0.880862	4.577	0.909	4.479	0.909019	4.565
	1.59	7 2A''		1.841	1.386	0.889	1.598	0.913	1.374	0.913	1.593	0.932	1.682	0.903	1.496	0.907392	1.653	0.896627	1.655	0.8991	1.677	0.934	1.488	0.930407	1.646	0.928908	1.649	0.930324	1.526	0.899	1.509	0.897378	1.459	0.899	1.442	0.897801	1.599	0.894	1.502	0.902257	1.595	0.892518	1.594	0.89284	1.592	0.923	1.493	0.926006	1.588
HSiS–	3.95	5 2A"		4.21	3.682	0.859	3.87	0.895	3.664	0.889	3.861	0.918	4.158	0.884	3.87	0.891328	4.06	0.876497	4.078	0.877229	4.156	0.918	3.861	0.915983	4.055	0.909546	4.073	0.910012	3.903	0.875	3.875	0.872267	3.904	0.875	3.876	0.872258	3.975	0.872	3.849	0.881266	3.951	0.869928	3.949	0.869923	3.967	0.904	3.838	0.907893	3.942
	2.32	6 2A'		2.567	2.036	0.883	2.355	0.914	2.021	0.909	2.35	0.935	2.444	0.898	2.194	0.904965	2.397	0.890491	2.397	0.892766	2.439	0.931	2.185	0.927915	2.391	0.924045	2.391	0.925101	2.207	0.893	2.184	0.891371	2.159	0.893	2.136	0.891714	2.295	0.888	2.181	0.896815	2.286	0.885999	2.284	0.886234	2.286	0.918	2.171	0.921117	2.277
HSiSi–	2.38	4 2A"		2.079	2.181	0.854	2.23	0.892	2.186	0.896	2.236	0.925	2.277	0.882	2.166	0.874853	2.214	0.872679	2.262	0.87651	2.288	0.93	2.17	0.908831	2.222	0.920717	2.272	0.923751	2.333	0.87	2.311	0.867311	2.243	0.871	2.221	0.868204	2.307	0.869	2.13	0.940292	2.291	0.865949	2.296	0.866455	2.319	0.912	2.129	0.96213	2.301
	2.34	5 2A'		2.003	2.202	0.858	2.211	0.894	2.212	0.9	2.219	0.928	2.254	0.884	2.181	0.869027	2.203	0.875709	2.246	0.879564	2.268	0.933	2.188	0.903371	2.214	0.924451	2.26	0.927654	2.334	0.873	2.316	0.870583	2.248	0.874	2.23	0.871358	2.307	0.872	2.016	0.111085	2.294	0.869546	2.299	0.870042	2.323	0.917	1.999	0.1117	2.309
HSS–	2.74	6 2A'		3.296	2.35	0.869	2.745	0.905	2.326	0.892	2.734	0.923	3.037	0.906	2.678	0.900775	2.885	0.892797	2.905	0.893859	3.029	0.934	2.664	0.921677	2.872	0.920746	2.893	0.921367	2.694	0.893	2.645	0.888703	2.668	0.893	2.619	0.88885	2.773	0.89	2.624	0.89121	2.731	0.885893	2.73	0.885973	2.758	0.917	2.608	0.913841	2.715
	2	7 2A''		2.434	1.601	0.876	1.976	0.91	1.579	0.9	1.967	0.929	2.226	0.906	1.888	0.905269	2.094	0.89591	2.114	0.897025	2.219	0.935	1.875	0.926611	2.083	0.924732	2.104	0.92535	1.91	0.896	1.867	0.892675	1.881	0.896	1.838	0.892836	1.991	0.893	1.848	0.896166	1.956	0.889671	1.955	0.889763	1.978	0.92	1.833	0.91921	1.942
NH2–	0.67	4 2B1		1.337	-0.295	0.829	0.141	0.86	-0.34	0.853	0.115	0.879	1.642	0.973	0.685	0.920215	1.011	0.91752	1.021	0.91732	1.651	1	0.671	0.93882	1.003	0.941855	1.013	0.941832	0.959	0.927	0.732	0.905743	1.024	0.927	0.795	0.905845	0.982	0.928	0.572	0.909077	0.754	0.906969	0.744	0.90698	0.972	0.955	0.554	0.93097	0.737
OCl–	2.38	6-7 2Π		3.87	1.566	0.854	2.438	0.895	1.514	0.875	2.416	0.91	3.562	0.939	2.649	0.909465	2.927	0.906182	2.952	0.906174	3.555	0.961	2.627	0.925812	2.906	0.926846	2.931	0.926889	2.761	0.909	2.548	0.896903	2.794	0.909	2.58	0.896803	2.798	0.909	2.438	0.898868	2.584	0.897109	2.579	0.897091	2.773	0.93	2.409	0.917461	2.555
OF–	2.56	6-7 2Π		4.687	1.54	0.85	2.657	0.889	1.484	0.867	2.63	0.901	3.684	0.944	2.793	0.90864	2.969	0.90899	3.041	0.909016	3.665	0.961	2.764	0.922422	2.938	0.92523	3.012	0.925333	2.946	0.911	2.704	0.898426	2.913	0.911	2.672	0.898495	2.906	0.912	2.555	0.898708	2.665	0.898882	2.67	0.898877	2.874	0.929	2.52	0.914012	2.628
OH–	1.74	3-4 2π		2.962	0.029	0.815	0.944	0.857	-0.038	0.836	0.91	0.872	4.408	1	2.243	0.97994	2.871	0.98418	2.682	0.984131	4.442	1	2.231	0.995802	2.869	0.100473	2.676	0.100488	2.476	0.996	1.951	0.947663	2.822	1	2.277	0.951616	2.703	1	1.89	0.950645	2.166	0.952932	2.108	0.952987	2.697	1	1.869	0.969202	2.148
PH2–	1.19	4 2B1		1.234	0.998	0.883	1.054	0.903	0.991	0.908	1.05	0.923	1.227	0.896	1.063	0.90585	1.227	0.890667	1.218	0.893015	1.227	0.928	1.058	0.928317	1.227	0.923872	1.217	0.92545	1.092	0.894	1.082	0.892622	1.045	0.894	1.035	0.893045	1.177	0.889	1.077	0.904236	1.179	0.887324	1.177	0.887573	1.175	0.919	1.073	0.927023	1.178
SCl–	2.63	6-7 2Π		3.218	2.304	0.878	2.7	0.911	2.281	0.901	2.69	0.929	2.863	0.907	2.572	0.90408	2.742	0.897218	2.768	0.898739	2.853	0.935	2.557	0.925042	2.728	0.924897	2.755	0.925813	2.6	0.897	2.559	0.89412	2.544	0.897	2.503	0.894432	2.665	0.894	2.539	0.895907	2.634	0.890903	2.634	0.891099	2.65	0.92	2.522	0.918123	2.617
SF–	2.44	6-7 2Π		2.977	2.138	0.885	2.476	0.913	2.119	0.906	2.467	0.929	2.64	0.915	2.388	0.9119	2.555	0.905997	2.572	0.90774	2.63	0.942	2.375	0.932012	2.542	0.933071	2.561	0.934126	2.429	0.909	2.394	0.90557	2.373	0.909	2.338	0.905814	2.505	0.905	2.383	0.906339	2.48	0.901645	2.48	0.901871	2.492	0.93	2.369	0.927473	2.466
SH–	2.24	3-4 2Π		2.584	1.882	0.87	2.116	0.901	1.864	0.893	2.107	0.919	2.479	0.914	2.158	0.908932	2.377	0.9008	2.387	0.902026	2.476	0.942	2.149	0.928942	2.371	0.92884	2.381	0.929616	2.195	0.904	2.156	0.898794	2.176	0.904	2.137	0.898888	2.289	0.901	2.14	0.901723	2.257	0.895541	2.255	0.895594	2.28	0.927	2.129	0.923445	2.248
SiH3–	1.83	4 2A'		1.836	1.675	0.9	1.771	0.915	1.671	0.923	1.77	0.934	1.835	0.902	1.711	0.915144	1.918	0.896763	1.857	0.8999	1.835	0.934	1.708	0.93647	1.922	0.93197	1.858	0.934028	1.671	0.904	1.671	0.903968	1.626	0.905	1.627	0.90427	1.792	0.898	1.718	0.914017	1.817	0.896519	1.811	0.896597	1.791	0.927	1.715	0.935522	1.817
SiN–	2.99	3 2Σ		2.905	2.084	0.758	2.371	0.814	2.036	0.804	2.348	0.85	4.432	1	2.714	0.931026	3.13	0.931228	3.244	0.928631	4.51	1	2.706	0.957651	3.14	0.971344	3.259	0.970559	3.874	0.969	3.386	0.89264	3.957	0.973	3.462	0.894209	3.564	0.974	2.768	0.915115	3.11	0.902619	3.105	0.902214	3.597	1	2.763	0.945828	3.12
	3.2	4-5 2Π		4.205	2.042	0.787	2.902	0.845	1.97	0.816	2.87	0.867	5.778	1	3.284	0.956692	3.501	0.970141	3.724	0.9693	5.843	1	3.264	0.976498	3.478	0.999514	3.706	0.999874	4.461	1	3.697	0.925053	4.357	1	3.605	0.923449	4.196	1	3.242	0.922619	3.458	0.92685	3.493	0.926478	4.196	1	3.218	0.945149	3.435
SiP–	3.05	3 2Σ		3.571	2.875	0.847	3.237	0.892	2.851	0.877	3.229	0.915	3.368	0.897	3.056	0.881821	3.135	0.877978	3.238	0.880093	3.36	0.933	3.041	0.908379	3.118	0.912556	3.225	0.914122	3.285	0.875	3.211	0.868675	3.15	0.876	3.077	0.869924	3.219	0.874	3.062	0.87457	3.15	0.868093	3.166	0.86844	3.206	0.907	3.046	0.901967	3.135
	3.03	4-5 2Π		2.638	2.697	0.844	2.727	0.886	2.7	0.887	2.73	0.919	2.909	0.887	2.679	0.891004	2.799	0.875146	2.863	0.876202	2.923	0.932	2.68	0.920842	2.808	0.919123	2.875	0.920446	2.919	0.869	2.887	0.864759	2.877	0.869	2.846	0.865102	2.885	0.871	2.66	0.943265	2.853	0.866606	2.859	0.86656	2.897	0.913	2.659	0.96428	2.864
	Statistics for signed deviations from CCST(T) All 55 VEDEs.			KT	D2	os-D2	nD-D2	os-nD-D2	D3	OVGF-A	OVGF-B	OVGF-C	nD-D3	nD-OVGF-A	nD-OVGF-B	nD-OVGF-C	P3	P3+	Q3	Q3+	L3	L3+A	L3+B	L3+C	nD-L3	nD-L3+A	nD-L3+B	nD-L3+C	DR	RP3	RQ3	RL3	nD-RL3	ND2	2ph-TDA	3+	NR2	BD-T1	ADC(3)	NRP3	NRQ3	NRL3
				0.607036	-0.521673	-0.0961273	-0.549345	-0.108945	0.630691	0.008	0.224127	0.240127	0.567796	-0.015	0.190093	0.214296	0.212982	0.0623455	0.165436	0.0253455	0.203018	-0.0657636	0.0714	0.0688909	0.193782	-0.0818909	0.0586545	0.0561636	0.0578182	-0.0998545	-0.101091	-0.0329091	-0.0523208	-0.529273	-0.528927	0.231154	-0.107291	0.0707091	0.14796	-0.100818	-0.114255	-0.0418182
				0.638959	0.473373	0.255169	0.493785	0.260594	0.894817	0.219803	0.359468	0.293344	0.786078	0.210566	0.317535	0.269846	0.387198	0.244183	0.419359	0.239187	0.335732	0.144733	0.165889	0.151903	0.328241	0.128627	0.154196	0.137539	0.237414	0.128767	0.157972	0.0854943	0.0805949	0.249126	0.250646	0.335969	0.115785	0.0923963	0.230679	0.125289	0.152179	0.0881109
	Statistics for absolute deviations from CCST(T) All 55 VEDEs.			KT	D2	os-D2	nD-D2	os-nD-D2	D3	OVGF-A	OVGF-B	OVGF-C	nD-D3	nD-OVGF-A	nD-OVGF-B	nD-OVGF-C	P3	P3+	Q3	Q3+	L3	L3+A	L3+B	L3+C	nD-L3	nD-L3+A	nD-L3+B	nD-L3+C	DR	RP3	RQ3	RL3	nD-RL3	ND2	2ph-TDA	3+	NR2	BD-T1	ADC(3)	NRP3	NRQ3	NRL3
				0.666309	0.5248	0.190345	0.552218	0.195673	0.646982	0.1456	0.258891	0.2578	0.582574	0.141593	0.22987	0.230704	0.275273	0.152855	0.269073	0.161636	0.219818	0.122782	0.0958364	0.0938727	0.210764	0.121309	0.0846909	0.0823091	0.179055	0.145382	0.166618	0.0769818	0.0842075	0.529273	0.528927	0.249278	0.143691	0.0844909	0.195265	0.1458	0.170945	0.0781455
				2.127	2.095	0.892	2.159	0.923	4.072	0.934	1.708	1.371	3.477	0.924	1.709	1.367	1.553	1.348	1.672	0.959	1.452	0.432	0.765	0.666	1.457	0.398	0.749	0.648	0.91	0.384	0.414	0.266	0.238	1.237	1.144	1.465	0.27	0.407	0.81181	0.272	0.382	0.266
[truncated: 109 more columns]

## Sheet: aQZ-VEDEs
				CCSD(T)/ aug-cc-pVQZ Versus EPT/ aug-cc-pVQZ
Anions	CCSD(T) VEDE	Final State		KT	D2	PS(D2)	os-D2	PS(os-D2)	nD-D2	PS(nD-D2)	os-nD-D2	PS(os-nD-D2)	D3	PS(D3)	OVGF-A	PS(OVGF-A)	OVGF-B	PS(OVGF-B)	OVGF-C	PS(OVGF-C)	nD-D3	PS(nD-D3)	nD-OVGF-A	PS(nD-OVGF-A)	nD-OVGF-B	PS(nD-OVGF-B)	nD-OVGF-C	PS(nD-OVGF-C)	P3	PS(P3)	P3+	PS(P3+)	Q3	PS(Q3)	Q3+	PS(Q3+)	L3	PS(L3)	L3+A	PS(L3+A)	L3+B	PS(L3+B)	L3+C	PS(L3+C)	nD-L3	PS(nD-L3)	nD-L3+A	PS(nD-L3+A)	nD-L3+B
AlH4–	4.9	2-4 2T2		5.4	5.011	0.92	5.219	0.933	5.005	0.934	5.216	0.946	4.976	0.904	4.995	0.911375	5.095	0.903361	4.938	0.878984	4.967	0.924	4.988	0.928217	5.088	0.92498	4.925	0.903988	4.826	0.907	4.838	0.907831	4.792	0.907	4.804	0.908076	4.931	0.903	4.961	0.905744	4.966	0.90289	4.964	0.902726	4.922	0.92	4.953	0.922715	4.957
AlO–	3.42	3-4 2Π		4.674	1.835	0.774	2.736	0.824	1.748	0.801	2.693	0.844	7.458	1	3.965	0.108134	4.866	0.109688	4.537	0.10979	X	X	X	X	X	X	X	X	4.613	1	3.937	0.938495	5.107	1	4.383	0.949803	4.871	1	3.818	0.947037	4.174	0.949439	4.088	0.949751	4.877	1	3.797	0.97037	4.16
	2.68	5 2Σ		2.749	2.357	0.896	2.596	0.914	2.346	0.921	2.593	0.936	3.139	0.93	2.613	0.942341	2.975	0.914097	2.97	0.916365	3.154	0.964	2.61	0.9592	2.984	0.949589	2.978	0.949864	2.81	0.925	2.735	0.919939	2.815	0.925	2.741	0.919912	2.897	0.92	2.624	0.936404	2.831	0.914057	2.826	0.91431	2.902	0.95	2.622	0.955389	2.834
AlS–	3.4	3-4 2Π		3.805	3.055	0.839	3.341	0.881	3.031	0.866	3.33	0.902	3.792	0.892	3.368	0.885267	3.62	0.87394	3.637	0.874588	3.791	0.923	3.357	0.907439	3.613	0.904415	3.631	0.904888	3.443	0.874	3.388	0.867935	3.438	0.874	3.383	0.867979	3.5	0.873	3.322	0.87442	3.448	0.866401	3.447	0.866407	3.49	0.902	3.308	0.89895	3.436
	2.73	5 2Σ		2.798	2.597	0.892	2.796	0.916	2.591	0.919	2.796	0.939	2.83	0.898	2.648	0.911698	2.841	0.891351	2.818	0.895329	2.832	0.934	2.644	0.935174	2.843	0.93018	2.819	0.931751	2.704	0.897	2.69	0.896459	2.638	0.898	2.624	0.896977	2.759	0.892	2.655	0.909446	2.762	0.890166	2.758	0.890615	2.758	0.924	2.652	0.933095	2.761
BH4–	4.66	2-4 2T2		5.19	4.548	0.905	4.885	0.927	4.537	0.921	4.88	0.941	4.732	0.912	4.634	0.913469	4.751	0.908837	4.729	0.9109	4.723	0.933	4.624	0.929866	4.741	0.929915	4.719	0.931259	4.584	0.908	4.58	0.907951	4.509	0.909	4.506	0.908368	4.628	0.906	4.599	0.907422	4.638	0.904865	4.633	0.905188	4.617	0.924	4.588	0.924232	4.627
BO–	5.73	3-4 2Π		6.855	4.803	0.827	5.509	0.871	4.749	0.851	5.483	0.888	7.115	0.929	6.038	0.896259	6.445	0.88908	6.394	0.889064	7.122	0.951	6.023	0.912541	6.435	0.90946	6.383	0.909616	6.181	0.894	5.946	0.879627	6.344	0.893	6.107	0.878683	6.22	0.897	5.795	0.885606	5.984	0.881989	5.96	0.88209	6.204	0.919	5.772	0.904903	5.963
	2.54	5 2Σ		2.974	2.536	0.894	2.677	0.905	2.526	0.915	2.671	0.923	2.598	0.903	2.559	0.900457	2.613	0.897752	2.596	0.902439	2.587	0.932	2.549	0.92316	2.601	0.928534	2.584	0.930934	2.625	0.902	2.615	0.90094	2.501	0.903	2.49	0.901739	2.62	0.897	2.582	0.900149	2.626	0.895805	2.621	0.896737	2.61	0.923	2.573	0.922145	2.616
BS–	4.42	3-4 2Π		4.632	4.297	0.869	4.456	0.905	4.286	0.897	4.452	0.927	4.605	0.89	4.39	0.895912	4.535	0.884467	4.56	0.885345	4.604	0.921	4.383	0.919589	4.532	0.915074	4.558	0.915813	4.462	0.881	4.443	0.879075	4.434	0.881	4.414	0.879306	4.485	0.88	4.384	0.889344	4.468	0.87843	4.469	0.878486	4.48	0.909	4.377	0.914126	4.463
	2.42	5 2Σ		3.084	2.356	0.867	2.677	0.892	2.337	0.891	2.668	0.912	2.553	0.888	2.435	0.881242	2.488	0.877524	2.524	0.882652	2.535	0.919	2.417	0.905964	2.466	0.910709	2.505	0.913402	2.545	0.877	2.516	0.874999	2.375	0.878	2.345	0.87656	2.498	0.873	2.437	0.87511	2.484	0.870741	2.489	0.871766	2.479	0.901	2.419	0.899651	2.465
CH3–	0.39	4 2A1		0.728	-0.03	0.836	0.104	0.855	-0.051	0.862	0.089	0.876	0.66	0.922	0.271	0.897922	0.438	0.897182	0.5	0.897688	0.657	0.953	0.259	0.919941	0.429	0.92702	0.493	0.927332	0.521	0.903	0.441	0.892375	0.447	0.903	0.368	0.892375	0.483	0.901	0.284	0.894516	0.405	0.890767	0.414	0.890845	0.475	0.931	0.272	0.918544	0.395
Cl–	3.61	2-4 2Tu		4.09	3.188	0.874	3.517	0.908	3.167	0.894	3.508	0.923	3.97	0.928	3.566	0.917925	3.82	0.912773	3.833	0.913571	3.967	0.953	3.556	0.93545	3.813	0.936981	3.827	0.937535	3.625	0.915	3.569	0.909233	3.607	0.915	3.551	0.909278	3.705	0.913	3.526	0.910897	3.656	0.907322	3.654	0.907362	3.695	0.937	3.514	0.93012	3.645
CN–	3.91	3 2Σ		5.259	3.564	0.863	4.177	0.895	3.531	0.881	4.161	0.909	4.251	0.912	3.914	0.894446	3.88	0.89526	4.059	0.896099	4.228	0.933	3.888	0.911734	3.849	0.915711	4.032	0.916213	4.226	0.891	4.111	0.884867	4.001	0.892	3.887	0.886216	4.028	0.891	3.879	0.886067	3.916	0.88534	3.951	0.885461	4.002	0.91	3.852	0.903792	3.887
	5.09	4-5 2Π		5.225	4.823	0.856	5.067	0.896	4.809	0.886	5.063	0.92	5.308	0.924	4.957	0.90331	5.032	0.905695	5.172	0.904518	5.31	0.954	4.95	0.926205	5.026	0.934307	5.171	0.933752	5.46	0.901	5.367	0.893205	5.359	0.901	5.267	0.89348	5.232	0.905	5.003	0.906821	5.139	0.897352	5.159	0.896844	5.232	0.934	4.998	0.929427	5.136
CP–	2.91	3 2Σ		4.384	2.582	0.815	3.31	0.864	2.533	0.839	3.288	0.883	3.508	0.919	2.981	0.866355	2.828	0.871788	3.167	0.873218	3.482	0.947	2.947	0.887895	2.784	0.897165	3.132	0.898788	3.554	0.868	3.334	0.851686	3.195	0.871	2.981	0.855211	3.204	0.871	2.963	0.855125	2.989	0.855996	3.064	0.856109	3.171	0.896	2.928	0.877252	2.951
	3.74	4-5 2Π		3.438	3.696	0.858	3.701	0.898	3.708	0.898	3.71	0.929	3.621	0.909	3.73	0.799136	3.487	0.89739	3.641	0.896279	3.629	0.95	3.747	0.843159	3.489	0.936409	3.65	0.93662	3.979	0.889	3.939	0.88398	3.837	0.889	3.798	0.884522	3.759	0.894	3.535	0.104329	3.718	0.889255	3.747	0.887502	3.773	0.932	3.52	0.106145	3.73
F–	3.38	2-4 2Tu		4.925	1.318	0.828	2.513	0.869	1.256	0.843	2.483	0.881	6.911	1	4.243	0.103051	5.054	0.103918	4.746	0.103901	6.949	1	4.232	0.104446	5.055	0.105708	4.741	0.105701	4.331	1	3.716	0.981974	4.845	1	4.197	0.990096	4.714	1	3.754	0.985816	4.076	0.990128	3.994	0.990139	4.71	1	3.736	0.100109	4.061
HAlCl–	1.98	6 2A'		1.855	1.863	0.908	1.978	0.919	1.863	0.933	1.981	0.942	1.956	0.901	1.861	0.923027	2.08	0.894857	1.982	0.898344	1.96	0.938	1.861	0.944108	2.09	0.936675	1.988	0.938299	1.829	0.907	1.832	0.90739	1.784	0.908	1.788	0.907706	1.934	0.9	1.86	0.932291	1.965	0.898506	1.956	0.898257	1.937	0.932	1.86	0.95127	1.969
HAlP–	3.87	3 2Σ		4.279	3.376	0.81	3.801	0.862	3.345	0.84	3.788	0.886	4.439	0.93	3.777	0.880427	4.083	0.876446	4.123	0.877799	4.446	0.969	3.764	0.903778	4.075	0.911065	4.117	0.912179	3.985	0.883	3.866	0.865024	3.944	0.883	3.827	0.865175	4.005	0.882	3.726	0.868757	3.891	0.864475	3.894	0.864558	3.994	0.916	3.709	0.895049	3.877
	2.24	4-5 2Π		2.064	1.832	0.828	1.969	0.87	1.822	0.864	1.966	0.899	2.427	0.908	1.954	0.898547	2.241	0.879316	2.279	0.880379	2.445	0.951	1.951	0.923252	2.25	0.919765	2.289	0.920826	2.205	0.88	2.143	0.870142	2.193	0.88	2.132	0.870188	2.222	0.881	1.967	0.897021	2.162	0.870381	2.162	0.870372	2.229	0.921	1.964	0.92321	2.166
HBF–	0.6	6 2A'		0.829	0.38	0.859	0.506	0.867	0.369	0.882	0.499	0.887	0.651	0.895	0.492	0.89037	0.679	0.884242	0.651	0.889516	0.644	0.93	0.483	0.914213	0.673	0.921187	0.644	0.924917	0.527	0.896	0.513	0.892865	0.468	0.896	0.455	0.89296	0.61	0.89	0.516	0.891622	0.614	0.885131	0.611	0.885833	0.603	0.921	0.507	0.916209	0.607
HBN–	3.86	3 2Σ		5.832	2.435	0.782	3.673	0.837	2.362	0.802	3.638	0.851	6.49	1	4.179	0.925161	4.499	0.935692	4.609	0.93552	6.508	1	4.153	0.939563	4.471	0.955236	4.583	0.955534	4.865	0.961	4.226	0.897405	4.802	0.96	4.167	0.896973	4.733	0.961	3.907	0.894525	4.1	0.898867	4.118	0.898763	4.708	0.982	3.871	0.911009	4.064
	3.05	4-5 2Π		3.117	2.384	0.823	2.702	0.867	2.357	0.855	2.691	0.892	3.71	0.983	2.828	0.922762	3.135	0.921018	3.245	0.920077	3.732	1	2.822	0.943873	3.135	0.952614	3.25	0.952312	3.487	0.931	3.275	0.905895	3.458	0.931	3.247	0.905675	3.313	0.933	2.862	0.917401	3.104	0.909165	3.114	0.908907	3.32	0.967	2.856	0.941249	3.103
HCC–	3.08	3 2Σ		4.672	2.681	0.829	3.385	0.868	2.637	0.849	3.362	0.884	3.622	0.904	3.145	0.871621	3.14	0.872912	3.334	0.874518	3.595	0.928	3.113	0.890233	3.101	0.895712	3.3	0.896885	3.46	0.87	3.309	0.859689	3.212	0.872	3.064	0.861747	3.262	0.87	3.069	0.860656	3.117	0.860429	3.157	0.860723	3.228	0.892	3.034	0.880031	3.08
	3.45	4-5 2Π		3.417	3.215	0.853	3.398	0.893	3.208	0.884	3.397	0.918	3.552	0.926	3.271	0.895918	3.317	0.905835	3.463	0.90575	3.557	0.961	3.267	0.920538	3.313	0.938398	3.464	0.938732	3.75	0.905	3.67	0.895658	3.604	0.905	3.525	0.895876	3.542	0.907	3.312	0.911642	3.461	0.898279	3.486	0.897824	3.546	0.939	3.309	0.933955	3.462
HCO–	0.61	6 2A'		1.221	0.117	0.873	0.59	0.896	0.091	0.896	0.577	0.914	0.973	0.924	0.531	0.913209	0.708	0.908337	0.773	0.909023	0.966	0.951	0.516	0.932769	0.694	0.934706	0.76	0.934908	0.731	0.912	0.64	0.905258	0.656	0.912	0.565	0.905427	0.708	0.909	0.504	0.907002	0.62	0.902982	0.628	0.903108	0.694	0.935	0.487	0.928283	0.603
HNB–	4.16	3-4 2Π		4.896	3.531	0.829	4.04	0.873	3.492	0.855	4.021	0.892	4.914	0.914	4.185	0.889505	4.45	0.882946	4.502	0.882681	4.915	0.94	4.17	0.908665	4.438	0.907701	4.491	0.907625	4.459	0.884	4.302	0.872359	4.455	0.884	4.299	0.872384	4.397	0.886	4.091	0.878964	4.24	0.874317	4.242	0.874256	4.382	0.911	4.071	0.900674	4.221
	1.86	5 2Σ		2.42	1.801	0.873	1.989	0.888	1.786	0.895	1.98	0.907	1.992	0.895	1.88	0.889081	1.978	0.885876	1.976	0.89088	1.978	0.926	1.866	0.912428	1.963	0.917976	1.961	0.920937	1.937	0.89	1.919	0.887274	1.822	0.89	1.805	0.887995	1.94	0.885	1.883	0.885392	1.938	0.882214	1.936	0.883308	1.926	0.912	1.869	0.908825	1.923
HNF–	4.23	6 2A'		5.403	3.251	0.852	4.14	0.891	3.205	0.871	4.119	0.906	5.161	0.95	4.27	0.915253	4.575	0.913783	4.609	0.913894	5.155	0.973	4.25	0.931222	4.556	0.934606	4.591	0.93469	4.44	0.919	4.239	0.904831	4.453	0.919	4.252	0.904822	4.462	0.918	4.1	0.905422	4.261	0.904603	4.259	0.904606	4.441	0.94	4.074	0.923479	4.235
	1.22	7 2A''		2.491	0.524	0.854	1.189	0.884	0.481	0.874	1.167	0.899	1.845	0.938	1.232	0.909072	1.379	0.910024	1.481	0.910253	1.83	0.961	1.208	0.9265	1.353	0.93138	1.458	0.931597	1.492	0.913	1.334	0.901391	1.393	0.912	1.236	0.901476	1.412	0.912	1.148	0.90116	1.256	0.90117	1.27	0.901197	1.387	0.934	1.12	0.920176	1.227
HOO–	2.1	6 2A'		3.967	0.901	0.834	2.021	0.876	0.839	0.853	1.992	0.89	3.528	0.966	2.327	0.910316	2.606	0.91154	2.655	0.911396	3.519	0.986	2.301	0.924645	2.58	0.92899	2.63	0.929036	2.559	0.918	2.245	0.898039	2.572	0.918	2.257	0.898033	2.521	0.919	2.054	0.898593	2.207	0.899339	2.206	0.899303	2.492	0.938	2.02	0.914962	2.172
	1.53	7 2A''		3.273	0.172	0.837	1.303	0.879	0.108	0.856	1.274	0.893	2.91	0.961	1.666	0.910149	1.979	0.910348	2.001	0.910151	2.903	0.98	1.641	0.924477	1.954	0.927691	1.976	0.927699	1.852	0.915	1.536	0.897134	1.906	0.915	1.589	0.897083	1.838	0.917	1.361	0.898468	1.521	0.898749	1.514	0.898717	1.809	0.936	1.326	0.914967	1.486
HPAl–	2.41	4 2A''		2.467	2.261	0.851	2.36	0.886	2.253	0.883	2.357	0.911	2.515	0.877	2.315	0.882102	2.462	0.868598	2.482	0.87102	2.517	0.915	2.311	0.908672	2.461	0.906156	2.483	0.907927	2.414	0.868	2.394	0.865185	2.355	0.868	2.336	0.865845	2.434	0.865	2.323	0.880209	2.421	0.862419	2.422	0.862758	2.433	0.9	2.318	0.907168	2.419
	2.19	5 2A'		2.243	2.042	0.878	2.243	0.907	2.036	0.907	2.243	0.931	2.247	0.89	2.086	0.898228	2.249	0.881958	2.234	0.886229	2.247	0.927	2.081	0.923948	2.25	0.921914	2.234	0.924089	2.149	0.886	2.135	0.885145	2.07	0.887	2.056	0.885876	2.187	0.881	2.094	0.896715	2.189	0.879402	2.186	0.879994	2.185	0.915	2.089	0.922469	2.186
HPCl–	4.64	6 2A'		5.178	4.398	0.873	4.816	0.909	4.379	0.896	4.809	0.927	4.834	0.895	4.588	0.894418	4.767	0.886284	4.778	0.8885	4.824	0.923	4.574	0.915916	4.754	0.915277	4.766	0.916601	4.6	0.886	4.574	0.884152	4.526	0.887	4.5	0.884713	4.652	0.883	4.553	0.886122	4.638	0.88053	4.638	0.880864	4.637	0.909	4.537	0.908686	4.622
	1.65	7 2A''		1.838	1.46	0.887	1.667	0.911	1.45	0.912	1.663	0.931	1.733	0.905	1.546	0.906576	1.698	0.89735	1.705	0.900238	1.729	0.936	1.539	0.929563	1.693	0.929841	1.7	0.931634	1.613	0.899	1.593	0.897259	1.53	0.899	1.51	0.897735	1.655	0.895	1.554	0.902951	1.648	0.893193	1.648	0.893655	1.649	0.924	1.547	0.926453	1.642
HSiS–	4.01	5 2A"		4.21	3.769	0.857	3.952	0.894	3.754	0.887	3.945	0.917	4.205	0.885	3.915	0.890262	4.102	0.876063	4.129	0.877045	4.205	0.918	3.907	0.914993	4.098	0.909452	4.126	0.910163	4.001	0.873	3.971	0.870837	3.975	0.874	3.945	0.871066	4.035	0.872	3.903	0.881593	4.009	0.869298	4.009	0.869367	4.029	0.904	3.894	0.907989	4.001
	2.37	6 2A'		2.571	2.112	0.882	2.426	0.913	2.099	0.907	2.423	0.934	2.486	0.898	2.239	0.904127	2.435	0.890363	2.44	0.892961	2.483	0.931	2.231	0.92708	2.43	0.923981	2.435	0.925301	2.29	0.892	2.266	0.890298	2.224	0.892	2.199	0.890767	2.345	0.888	2.231	0.896868	2.334	0.885751	2.333	0.886094	2.338	0.917	2.222	0.920986	2.326
HSiSi–	2.41	4 2A"		2.079	2.24	0.852	2.287	0.89	2.248	0.893	2.295	0.923	2.298	0.885	2.226	0.860544	2.228	0.874143	2.288	0.878395	2.31	0.933	2.232	0.89595	2.236	0.922127	2.299	0.925709	2.404	0.871	2.379	0.867612	2.293	0.872	2.269	0.868594	2.339	0.871	2.166	0.944818	2.319	0.867441	2.329	0.867984	2.352	0.914	2.165	0.965999	2.331
	2.37	5 2A'		2.004	2.261	0.855	2.268	0.892	2.274	0.897	2.278	0.926	2.273	0.887	2.254	0.844299	2.215	0.877313	2.271	0.881646	2.288	0.936	2.265	0.881031	2.227	0.926011	2.286	0.929839	2.405	0.874	2.384	0.871068	2.298	0.875	2.278	0.871911	2.338	0.874	1.996	0.123837	2.321	0.871208	2.33	0.871735	2.356	0.919	1.95	0.126968	2.338
HSS–	2.82	6 2A'		3.297	2.447	0.867	2.835	0.903	2.424	0.891	2.825	0.922	3.104	0.906	2.732	0.900176	2.945	0.8925	2.975	0.893843	3.098	0.935	2.719	0.921179	2.934	0.920959	2.965	0.921838	2.803	0.892	2.75	0.887709	2.752	0.892	2.7	0.887994	2.848	0.89	2.691	0.891113	2.803	0.885498	2.805	0.885658	2.835	0.917	2.676	0.913744	2.789
	2.08	7 2A''		2.433	1.697	0.874	2.066	0.909	1.677	0.899	2.058	0.928	2.291	0.907	1.942	0.904712	2.155	0.895468	2.183	0.896848	2.287	0.936	1.931	0.926119	2.145	0.924782	2.175	0.925651	2.018	0.895	1.972	0.891575	1.965	0.895	1.919	0.891857	2.066	0.893	1.913	0.896202	2.028	0.889153	2.029	0.889324	2.055	0.92	1.9	0.919202	2.015
NH2–	0.71	4 2B1		1.349	-0.224	0.824	0.198	0.854	-0.268	0.848	0.174	0.873	1.732	0.996	0.721	0.928071	1.053	0.928411	1.085	0.92806	1.743	1	0.708	0.946882	1.045	0.953405	1.078	0.953297	1.107	0.94	0.86	0.91442	1.14	0.941	0.891	0.914622	1.076	0.942	0.636	0.916669	0.828	0.915921	0.825	0.915902	1.068	0.969	0.618	0.938743	0.813
OCl–	2.48	6-7 2Π		3.87	1.678	0.853	2.542	0.894	1.628	0.873	2.52	0.909	3.641	0.94	2.7	0.90922	2.989	0.906049	3.035	0.906054	3.636	0.963	2.679	0.925676	2.969	0.927107	3.016	0.92719	2.893	0.909	2.673	0.896239	2.893	0.909	2.674	0.896238	2.888	0.909	2.513	0.898621	2.669	0.896795	2.669	0.896776	2.865	0.931	2.485	0.917311	2.641
OF–	2.63	6-7 2Π		4.687	1.648	0.849	2.756	0.888	1.593	0.866	2.731	0.9	3.74	0.945	2.837	0.908425	3.008	0.909322	3.106	0.909341	3.722	0.963	2.809	0.922251	2.978	0.925679	3.078	0.925811	3.072	0.912	2.824	0.898191	3.001	0.912	2.755	0.89832	2.982	0.912	2.622	0.898518	2.735	0.898918	2.747	0.898906	2.951	0.929	2.588	0.913834	2.7
OH–	1.79	3-4 2π		2.97	0.113	0.812	1.023	0.853	0.048	0.832	0.99	0.869	4.596	1	2.252	0.100346	2.908	0.101208	2.749	0.101199	4.637	1	2.239	0.102036	2.905	0.10345	2.742	0.103468	2.672	1	2.106	0.961332	2.974	1	2.388	0.966623	2.835	1	1.962	0.963351	2.259	0.967283	2.208	0.967344	2.832	1	1.942	0.98223	2.242
PH2–	1.23	4 2B1		1.237	1.057	0.878	1.108	0.898	1.052	0.904	1.105	0.919	1.268	0.9	1.103	0.903836	1.261	0.892631	1.256	0.895737	1.27	0.932	1.1	0.926136	1.262	0.926007	1.257	0.928314	1.175	0.896	1.162	0.893624	1.11	0.896	1.097	0.894127	1.226	0.892	1.118	0.906085	1.225	0.889301	1.223	0.889788	1.226	0.922	1.116	0.928168	1.224
SCl–	2.72	6-7 2Π		3.214	2.4	0.876	2.79	0.91	2.379	0.899	2.782	0.928	2.939	0.907	2.634	0.903339	2.814	0.896537	2.846	0.898334	2.931	0.936	2.62	0.924376	2.801	0.924754	2.835	0.925911	2.708	0.896	2.664	0.892869	2.631	0.897	2.588	0.893272	2.744	0.894	2.609	0.895627	2.71	0.890172	2.713	0.890444	2.731	0.92	2.594	0.917856	2.696
SF–	2.51	6-7 2Π		2.976	2.233	0.883	2.565	0.911	2.216	0.905	2.557	0.928	2.711	0.916	2.448	0.91132	2.623	0.905966	2.645	0.908072	2.704	0.944	2.436	0.931439	2.612	0.933567	2.636	0.934925	2.535	0.909	2.498	0.905042	2.458	0.909	2.421	0.90534	2.582	0.905	2.45	0.906583	2.555	0.901617	2.557	0.90194	2.571	0.931	2.438	0.927625	2.543
SH–	2.3	3-4 2Π		2.585	1.968	0.867	2.198	0.899	1.952	0.89	2.19	0.917	2.543	0.917	2.204	0.90908	2.434	0.902233	2.451	0.903844	2.542	0.946	2.196	0.928996	2.429	0.930779	2.447	0.931968	2.302	0.905	2.258	0.899532	2.257	0.905	2.214	0.899703	2.361	0.903	2.198	0.903219	2.326	0.896902	2.326	0.897079	2.354	0.93	2.189	0.924701	2.318
SiH3–	1.85	4 2A'		1.837	1.721	0.898	1.815	0.913	1.718	0.921	1.815	0.933	1.853	0.905	1.742	0.91297	1.929	0.898971	1.868	0.903302	1.853	0.937	1.74	0.934391	1.933	0.934006	1.869	0.937108	1.727	0.906	1.726	0.905061	1.67	0.906	1.669	0.905378	1.818	0.9	1.748	0.914045	1.839	0.898619	1.831	0.899075	1.817	0.929	1.746	0.935281	1.839
SiN–	3.03	3 2Σ		2.906	2.149	0.756	2.434	0.812	2.105	0.802	2.413	0.849	4.442	1	2.71	0.931584	3.111	0.935306	3.267	0.932021	4.521	1	2.702	0.958076	3.119	0.975967	3.283	0.974706	3.971	0.978	3.467	0.896707	4.013	0.98	3.505	0.897651	3.597	0.979	2.778	0.917624	3.132	0.905116	3.139	0.90441	3.631	1	2.773	0.947789	3.143
	3.23	4-5 2Π		4.211	2.112	0.785	2.972	0.843	2.042	0.814	2.941	0.865	5.823	1	3.29	0.958645	3.493	0.975127	3.757	0.974101	5.891	1	3.269	0.978661	3.468	0.100518	3.74	0.100551	4.568	1	3.784	0.927632	4.423	1	3.656	0.925103	4.243	1	3.27	0.923163	3.49	0.928439	3.538	0.927957	4.244	1	3.247	0.945491	3.469
SiP–	3.1	3 2Σ		3.573	2.947	0.845	3.308	0.89	2.925	0.875	3.301	0.913	3.407	0.899	3.099	0.879775	3.165	0.878169	3.283	0.880374	3.4	0.935	3.085	0.90647	3.149	0.912819	3.272	0.914562	3.368	0.875	3.291	0.867851	3.213	0.876	3.136	0.869245	3.265	0.875	3.107	0.873951	3.193	0.868198	3.214	0.868502	3.254	0.907	3.093	0.901259	3.179
	3.07	4-5 2Π		2.637	2.764	0.842	2.79	0.884	2.77	0.884	2.796	0.917	2.935	0.889	2.731	0.880694	2.818	0.875999	2.896	0.877065	2.951	0.935	2.735	0.911496	2.827	0.920017	2.91	0.921537	2.996	0.869	2.962	0.864518	2.932	0.87	2.898	0.865006	2.923	0.872	2.682	0.960297	2.888	0.867393	2.898	0.867178	2.937	0.914	2.68	0.979118	2.9
	Statistics for signed deviations from CCST(T) All 55 VEDEs.			KT	D2	os-D2	nD-D2	os-nD-D2	D3	OVGF-A	OVGF-B	OVGF-C	nD-D3	nD-OVGF-A	nD-OVGF-B	nD-OVGF-C	P3	P3+	Q3	Q3+	L3	L3+A	L3+B	L3+C	nD-L3	nD-L3+A	nD-L3+B	nD-L3+C	DR	RP3	RQ3	RL3	nD-RL3	ND2	2ph-TDA	3+	NR2	BD-T1	ADC(3)	NRP3	NRQ3	NRL3
				0.562691	-0.493055	-0.0724727	-0.518945	-0.0840545	0.626236	-0.00274545	0.201982	0.233873	0.565352	-0.0241111	0.169796	0.209852	0.227055	0.0824909	0.187255	0.0416	0.209127	-0.0685818	0.0713818	0.0734182	0.201327	-0.0837273	0.0597818	0.0620182	0.147236	-0.0401818	-0.0887273	-0.0318727	-0.0467091	-0.461636	-0.523982	0.215964	-0.075	0.0530182	0.150862	-0.0716	-0.107509	-0.0444727
				0.632132	0.468696	0.252654	0.489188	0.257818	0.904256	0.203999	0.351172	0.291987	0.799982	0.198333	0.313215	0.270177	0.352292	0.17801	0.426787	0.241055	0.342565	0.147099	0.167899	0.155522	0.335402	0.132241	0.156541	0.141449	0.226681	0.142319	0.157645	0.0862468	0.0820077	0.307412	0.245943	0.32716	0.126531	0.0896515	0.228478	0.124993	0.142454	0.0794883
	Statistics for absolute deviations from CCST(T) All 55 VEDEs.			KT	D2	os-D2	nD-D2	os-nD-D2	D3	OVGF-A	OVGF-B	OVGF-C	nD-D3	nD-OVGF-A	nD-OVGF-B	nD-OVGF-C	P3	P3+	Q3	Q3+	L3	L3+A	L3+B	L3+C	nD-L3	nD-L3+A	nD-L3+B	nD-L3+C	DR	RP3	RQ3	RL3	nD-RL3	ND2	2ph-TDA	3+	NR2	BD-T1	ADC(3)	NRP3	NRQ3	NRL3
				0.631891	0.497091	0.1808	0.522764	0.185473	0.643945	0.138164	0.243618	0.251836	0.581352	0.136185	0.218315	0.226333	0.263091	0.138018	0.2758	0.159527	0.224545	0.124291	0.0969455	0.0979273	0.216055	0.122745	0.0853455	0.0860182	0.220764	0.125091	0.161382	0.0764909	0.0819091	0.498218	0.523982	0.236855	0.128455	0.0720727	0.193418	0.1264	0.161327	0.0728364
				2.057	2.062	0.867	2.124	0.897	4.038	0.863	1.674	1.366	3.569	0.852	1.675	1.361	1.538	0.754	1.687	0.963	1.451	0.452	0.754	0.668	1.457	0.42	0.74	0.651	0.784	0.429	0.416	0.258	0.231	1.094	1.134	1.428	0.4	0.368	0.818923	0.364	0.382	0.256
[truncated: 109 more columns]

## Sheet: Quartic_CBS-a23-VEDEs
							CCSD(T)/ CBS-a23 Versus EPT/ CBS-a23
Anions	CCSD(T) VEDE	Final State		KT	D2	PS(D2)	os-D2	PS(os-D2)	nD-D2	PS(nD-D2)	os-nD-D2	PS(os-nD-D2)	D3	PS(D3)	OVGF-A	PS(OVGF-A)	OVGF-B	PS(OVGF-B)	OVGF-C	PS(OVGF-C)	nD-D3	PS(nD-D3)	nD-OVGF-A	PS(nD-OVGF-A)	nD-OVGF-B	PS(nD-OVGF-B)	nD-OVGF-C	PS(nD-OVGF-C)	P3	PS(P3)	P3+	PS(P3+)	Q3	PS(Q3)	Q3+	PS(Q3+)	L3	PS(L3)	L3+A	PS(L3+A)	L3+B	PS(L3+B)	L3+C	PS(L3+C)	nD-L3	PS(nD-L3)	nD-L3+A	PS(nD-L3+A)	nD-L3+B
AlH4–	4.91519	2-4 2T2		5.40661	5.01984		5.22673		5.01319		5.22444		4.99465		5.00669		5.1193		4.96278		4.98601		4.99905		5.11165		4.94978		4.8346		4.84595		4.80156		4.81292		4.94923		4.9738		4.98553		4.98416		4.94093		4.96651		4.97688
AlO–	3.40167	3-4 2Π		4.67393	1.80796		2.70423		1.72001		2.65959		X		X		X		X		X		X		X		X		4.57966		3.90781		5.07649		4.35786		4.84699		3.80061		4.15471		4.06662		4.85269		3.78032		4.13871
	2.67815	5 2Σ		2.74918	2.34541		2.58584		2.33447		2.58119		3.14919		2.61233		2.98567		2.97695		3.16389		2.60933		2.99537		2.98565		2.80264		2.72823		2.81067		2.73526		2.90328		2.62608		2.83852		2.83158		2.90834		2.62378		2.84123
AlS–	3.36463	3-4 2Π		3.79983	3.01755		3.29829		2.99531		3.28564		3.74698		3.33252		3.58098		3.5986		3.74533		3.32187		3.57298		3.59095		3.39203		3.33868		3.38999		3.33699		3.4631		3.28952		3.41345		3.41226		3.45045		3.27387		3.40115
	2.71463	5 2Σ		2.79318	2.57601		2.77443		2.56871		2.77314		2.821		2.63071		2.83595		2.80895		2.82171		2.62606		2.838		2.81		2.68082		2.66577		2.61691		2.60321		2.74963		2.64082		2.75493		2.74958		2.74734		2.63752		2.75263
BH4–	4.67815	2-4 2T2		5.19509	4.55114		4.88556		4.53949		4.88127		4.74271		4.63615		4.76389		4.73924		4.73306		4.62651		4.75389		4.7296		4.58695		4.5836		4.51212		4.50912		4.63938		4.60554		4.65097		4.64391		4.62738		4.59525		4.63932
BO–	5.70463	3-4 2Π		6.85348	4.77364		5.47427		4.7187		5.44797		7.08626		6.01552		6.41924		6.36769		7.09091		6.00016		6.41024		6.35533		6.14672		5.91314		6.31249		6.07662		6.19539		5.77295		5.96117		5.93586		6.1791		5.7493		5.93987
	2.55519	5 2Σ		2.97482	2.53727		2.67599		2.52697		2.66969		2.61078		2.56271		2.6288		2.60702		2.59849		2.55241		2.61651		2.59643		2.62666		2.61695		2.50351		2.49345		2.63201		2.58871		2.63854		2.63325		2.62306		2.57806		2.62825
BS–	4.39167	3-4 2Π		4.63154	4.27018		4.42386		4.25894		4.41856		4.57524		4.35941		4.50889		4.53193		4.57295		4.35311		4.50424		4.52863		4.42542		4.40707		4.39784		4.37949		4.46125		4.36078		4.44625		4.44665		4.4553		4.35249		4.4403
	2.41871	5 2Σ		3.08389	2.34816		2.66723		2.32886		2.65793		2.55415		2.43002		2.49387		2.52521		2.53621		2.41173		2.47158		2.50456		2.53784		2.50808		2.36647		2.33671		2.50178		2.43614		2.48932		2.49273		2.48249		2.41819		2.47038
CH3–	0.398711	4 2A1		0.723557	-0.0203418		0.111045		-0.0429899		0.096397		0.645488		0.264745		0.435171		0.494136		0.64184		0.254449		0.425171		0.48584		0.501811		0.426533		0.427881		0.352602		0.47438		0.280526		0.402101		0.408916		0.465435		0.26823		0.390805
Cl–	3.53815	2-4 2Tu		4.08924	3.14023		3.4614		3.11788		3.4504		3.8885		3.50887		3.74456		3.76006		3.8835		3.49752		3.73556		3.75276		3.55449		3.50249		3.53639		3.48439		3.64032		3.47299		3.59402		3.59349		3.62867		3.46034		3.58138
CN–	3.91927	3 2Σ		5.26369	3.56238		4.17334		3.52809		4.1567		4.2576		3.85958		3.88804		4.06393		4.23495		3.88901		3.85569		4.03729		4.22435		4.10983		3.99871		3.88519		4.03568		3.88392		3.92551		3.95873		4.00938		3.85627		3.89586
	5.08519	4-5 2Π		5.22459	4.80757		5.04619		4.79368		5.04125		5.29574		4.938		5.02194		5.16011		5.29809		4.93036		5.01459		5.15747		5.44248		5.34931		5.3414		5.24993		5.22454		4.99321		5.13138		5.15101		5.2246		4.98826		5.12843
CP–	2.90223	3 2Σ		4.37918	2.56351		3.28899		2.51351		3.26599		3.50045		2.96652		2.82437		3.15738		3.4738		2.93287		2.77902		3.12138		3.53053		3.3116		3.17395		2.96002		3.19578		2.95086		2.98286		3.05449		3.16214		2.91521		2.94421
	3.74167	4-5 2Π		3.43472	3.67732		3.67647		3.68914		3.68523		3.60984		3.69325		3.47885		3.62763		3.61789		3.70642		3.48056		3.63569		3.95566		3.91555		3.81349		3.77608		3.75132		3.52513		3.71121		3.73778		3.76508		3.51872		3.72297
F–	3.33815	2-4 2Tu		4.92154	1.28186		2.46938		1.21751		2.43838		6.80262		4.21655		5.00076		4.69613		6.83873		4.20549		5.0014		4.69248		4.27404		3.66793		4.78396		4.14719		4.6547		3.71562		4.02764		3.94573		4.64975		3.69697		4.01234
HAlCl–	1.98815	6 2A'		1.8513	1.86158		1.97571		1.86164		1.97841		1.96545		1.85556		2.09775		1.99436		1.96951		1.85662		2.1088		2.00006		1.8268		1.82945		1.78206		1.78471		1.94402		1.85815		1.97797		1.96915		1.94743		1.85886		1.98338
HAlP–	3.86111	3 2Σ		4.26709	3.34777		3.76778		3.31582		3.75314		4.42406		3.75643		4.0763		4.11032		4.43076		3.74207		4.06865		4.10402		3.94417		3.82977		3.91019		3.79613		3.98584		3.7055		3.87748		3.878		3.97454		3.68785		3.86219
	2.22463	4-5 2Π		2.06335	1.8084		1.94201		1.79716		1.93806		2.41615		1.93763		2.23533		2.2686		2.43285		1.93363		2.24369		2.2773		2.17251		2.1131		2.16599		2.10693		2.20928		1.95408		2.15123		2.15104		2.21534		1.95178		2.15528
HBF–	0.615191	6 2A'		0.825446	0.387324		0.511637		0.37638		0.504341		0.652359		0.494488		0.687376		0.654728		0.646766		0.486191		0.682432		0.647432		0.521327		0.509568		0.462602		0.450843		0.614508		0.520174		0.621341		0.616989		0.606564		0.512582		0.614749
HBN–	3.85167	3 2Σ		5.81944	2.40584		3.63775		2.33284		3.60375		6.46906		4.15828		4.48572		4.58972		6.48676		4.13157		4.45837		4.56372		4.82624		4.19127		4.76943		4.13863		4.7121		3.88543		4.08195		4.09715		4.68645		3.84943		4.0453
	3.05167	4-5 2Π		3.11776	2.36636		2.68016		2.33812		2.66856		3.70446		2.81765		3.13185		3.23684		3.72682		2.81065		3.1325		3.24154		3.4662		3.25592		3.44106		3.23184		3.30551		2.85554		3.09828		3.10626		3.31256		2.84924		3.09799
HCC–	3.10279	3 2Σ		4.67733	2.68251		3.38353		2.63786		3.36088		3.63673		3.15073		3.15671		3.34571		3.60908		3.11773		3.11806		3.31241		3.46264		3.31037		3.21455		3.06597		3.27651		3.07805		3.13193		3.17021		3.24221		3.0424		3.09429
	3.44167	4-5 2Π		3.4163	3.20123		3.37827		3.19334		3.37768		3.54569		3.25223		3.31159		3.4536		3.54969		3.24793		3.30859		3.4553		3.73379		3.65398		3.58753		3.51041		3.53667		3.30269		3.45686		3.47943		3.54073		3.30039		3.45756
HCO–	0.619268	6 2A'		1.22291	0.124236		0.593679		0.0976441		0.581735		0.971711		0.531247		0.711968		0.774989		0.964414		0.515247		0.695968		0.761693		0.728498		0.638331		0.65016		0.561697		0.712066		0.508435		0.626251		0.634418		0.698474		0.491491		0.610306
HNB–	4.15167	3-4 2Π		4.89746	3.5151		4.01884		3.47416		3.99919		4.89941		4.17111		4.4382		4.48843		4.89906		4.15611		4.42585		4.47678		4.95891		4.16593		4.30843		4.31303		4.38497		4.07904		4.22945		4.23143		4.37102		4.0601		4.21115
	1.87519	5 2Σ		2.42117	1.80527		1.99134		1.79032		1.98205		2.01008		1.88784		2.00004		1.99162		1.99578		1.8749		1.98475		1.97767		3.98422		3.7113		1.24961		1.81145		1.95636		1.89265		1.95519		1.9519		1.94241		1.88006		1.94025
HNF–	4.21519	6 2A'		5.39789	3.23744		4.12053		3.18979		4.10023		5.13506		4.24945		4.55422		4.58875		5.12806		4.22945		4.53387		4.5701		4.4192		4.22022		4.4299		4.22992		4.4468		4.08595		4.24853		4.24445		4.42486		4.05965		4.22188
	1.21279	7 2A''		2.49298	0.518163		1.18055		0.474867		1.1579		1.83258		1.22243		1.3698		1.47256		1.81764		1.19778		1.34415		1.44927		1.47922		1.32259		1.37914		1.22386		1.40781		1.14401		1.25353		1.26646		1.38186		1.11571		1.22459
HOO–	2.08575	6 2A'		3.96465	0.876125		1.99146		0.814829		1.96181		3.50726		2.30872		2.58609		2.6346		3.49762		2.28272		2.56009		2.60895		2.53211		2.21937		2.54159		2.23495		2.50431		2.03869		2.19092		2.18995		2.47501		2.00269		2.15527
	1.50927	7 2A''		3.27428	0.153682		1.27931		0.0890343		1.24831		2.89178		1.6516		1.96332		1.98423		2.88414		1.6256		1.93797		1.95823		1.83232		1.51622		1.88738		1.57134		1.82634		1.34973		1.50995		1.50099		1.79705		1.2546		1.47466
HPAl–	2.40519	4 2A''		2.46676	2.24866		2.34186		2.24042		2.33927		2.50958		2.30075		2.45987		2.47745		2.51128		2.2951		2.45993		2.47715		2.39483		2.37577		2.33741		2.31836		2.43036		2.31414		2.42036		2.42141		2.42877		2.30919		2.41877
	2.19167	5 2A'		2.23894	2.02599		2.22406		2.01905		2.22412		2.24217		2.07063		2.25087		2.23052		2.24187		2.06634		2.25058		2.23058		2.12916		2.1151		2.05178		2.03808		2.18291		2.08245		2.18621		2.18221		2.18097		2.07815		2.18426
HPCl–	4.61871	6 2A'		5.17294	4.38059		4.79249		4.36029		4.78519		4.81226		4.56651		4.75026		4.76014		4.80097		4.55186		4.73662		4.74684		4.5734		4.5487		4.49793		4.47288		4.63664		4.53717		4.62564		4.62569		4.62169		4.52088		4.60969
	1.64631	7 2A''		1.84276	1.45709		1.65959		1.44614		1.65529		1.73056		1.54069		1.70297		1.70603		1.72697		1.53375		1.69703		1.70144		1.60131		1.58361		1.51671		1.49901		1.65918		1.55549		1.65483		1.65453		1.65394		1.54755		1.64994
HSiS–	3.97463	5 2A"		4.20613	3.73655		3.91223		3.71995		3.90393		4.16856		3.88197		4.06985		4.09665		4.16691		3.87332		4.06521		4.09236		3.95508		3.92673		3.93215		3.9038		4.00421		3.87504		3.98056		3.98032		3.99726		3.86475		3.97262
	2.37631	6 2A'		2.57615	2.10955		2.41975		2.09596		2.41581		2.48764		2.23658		2.4424		2.44486		2.48334		2.22829		2.4378		2.43992		2.27985		2.25649		2.21531		2.19195		2.3506		2.23308		2.34195		2.34066		2.34301		2.22414		2.33436
HSiSi–	2.41167	4 2A"		2.07794	2.22288		2.26554		2.22999		2.27295		2.29284		2.20049		2.22808		2.28171		2.30489		2.2059		2.23748		2.29276		2.37769		2.35464		2.27151		2.24845		2.33234		2.14936		2.31599		2.32204		2.3461		2.14836		2.32704
	2.37167	5 2A'		2.003	2.24529		2.2476		2.25775		2.25701		2.27089		2.22429		2.21848		2.26606		2.28595		2.23305		2.23019		2.28182		2.38045		2.36175		2.27756		2.25886		2.3341		2.01635		2.32039		2.3268		2.35151		1.99407		2.33715
HSS–	2.78575	6 2A'		3.29635	2.41933		2.80201		2.39568		2.79136		3.0736		2.70686		2.92125		2.94899		3.0663		2.69321		2.9086		2.93769		2.76227		2.71257		2.71516		2.66545		2.82332		2.66799		2.78168		2.78208		2.80938		2.65269		2.76638
	2.05631	7 2A''		2.43717	1.67912		2.04146		1.65818		2.03316		2.26893		1.9239		2.13729		2.16503		2.26264		1.91125		2.12699		2.15573		1.98637		1.94266		1.93555		1.89184		2.04942		1.90008		2.01477		2.01553		2.03747		1.88579		2.00218
NH2–	0.715749	4 2B1		1.34721	-0.222506		0.198714		-0.266802		0.172714		1.68353		0.702948		1.02754		1.06147		1.69358		0.688596		1.01954		1.05417		1.06915		0.831944		1.09825		0.859048		1.04605		0.618453		0.808547		0.804177		1.03746		0.601157		0.792251
OCl–	2.43279	6-7 2Π		3.86965	1.65116		2.50662		1.59916		2.48533		3.5993		2.67082		2.95128		2.99951		3.59301		2.64882		2.93028		2.97886		2.85778		2.6402		2.85734		2.63912		2.85959		2.48832		2.64136		2.64199		2.83529		2.45968		2.61307
OF–	2.60927	6-7 2Π		4.68489	1.62059		2.72492		1.56494		2.69792		3.71356		2.81165		2.98097		3.07865		3.69456		2.7823		2.94961		3.05001		3.0463		2.79796		2.97494		2.72831		2.96231		2.60251		2.71568		2.72666		2.93101		2.56786		2.67903
OH–	1.77871	3-4 2π		2.96798	0.0976233		0.999954		0.0309752		0.965954		4.47698		2.23737		2.87241		2.71543		4.51344		2.22502		2.87041		2.70943		2.60726		2.06045		2.90787		2.34105		2.77761		1.93117		2.21949		2.16959		2.77301		1.91088		2.20219
PH2–	1.24279	4 2B1		1.24104	1.06416		1.11031		1.05822		1.10701		1.26958		1.10417		1.27134		1.26164		1.27099		1.09953		1.27275		1.26169		1.16379		1.15273		1.09919		1.08849		1.2319		1.12416		1.23355		1.23155		1.23131		1.12121		1.23431
SCl–	2.67575	6-7 2Π		3.21307	2.37086		2.75455		2.34822		2.7449		2.89925		2.60226		2.77895		2.81093		2.8903		2.58762		2.76565		2.79899		2.66546		2.62375		2.58905		2.54699		2.71462		2.58299		2.68432		2.68538		2.70068		2.56634		2.66803
SF–	2.48927	6-7 2Π		2.97489	2.20733		2.53371		2.18903		2.52507		2.67836		2.42002		2.59547		2.61634		2.66906		2.40738		2.58282		2.60605		2.49657		2.46086		2.42016		2.3848		2.55779		2.42875		2.53314		2.53419		2.54549		2.4151		2.51984
SH–	2.28223	3-4 2Π		2.58682	1.9464		2.16879		1.9291		2.16014		2.51032		2.18087		2.40832		2.42465		2.50802		2.17223		2.40302		2.41936		2.26081		2.22075		2.21929		2.17923		2.33616		2.17836		2.3038		2.30321		2.32786		2.16806		2.29586
SiH3–	1.86871	4 2A'		1.83776	1.72919		1.81992		1.7266		1.81997		1.86949		1.74725		1.9553		1.88797		1.87054		1.7453		1.96106		1.89002		1.72766		1.72731		1.67034		1.67134		1.83353		1.75636		1.85853		1.85077		1.83393		1.75441		1.85993
SiN–	3.01815	3 2Σ		2.89726	2.12553		2.40408		2.07999		2.38284		4.42602		2.69676		3.1029		3.25315		4.50543		2.6884		3.1122		3.26885		3.93805		3.43949		3.98375		3.48136		3.58124		2.76624		3.1195		3.124		3.616		2.76124		3.13021
	3.22463	4-5 2Π		4.20922	2.0786		2.94001		2.0066		2.90801		5.8417		3.27978		3.49396		3.75004		5.91127		3.25907		3.46955		3.73169		4.54264		3.75647		4.40451		3.63421		4.23753		3.25643		3.48123		3.52538		4.23893		3.23278		3.45858
SiP–	3.08871	3 2Σ		3.56572	2.91758		3.27465		2.89464		3.26736		3.39087		3.07606		3.15541		3.26615		3.38393		3.06141		3.13876		3.25421		3.3304		3.25499		3.17815		3.1041		3.24751		3.08628		3.17745		3.19556		3.23521		3.07063		3.16351
	3.06167	4-5 2Π		2.63378	2.74029		2.76219		2.74575		2.7666		2.92308		2.70328		2.80921		2.88306		2.93813		2.70534		2.81926		2.89682		2.96616		2.93275		2.90445		2.87239		2.91139		2.67161		2.87799		2.8868		2.9248		2.67061		2.89039
	Statistics for signed deviations from CCST(T) All 55 VEDEs.			KT	D2	os-D2	nD-D2	os-nD-D2	D3	OVGF-A	OVGF-B	OVGF-C	nD-D3	nD-OVGF-A	nD-OVGF-B	nD-OVGF-C	P3	P3+	Q3	Q3+	L3	L3+A	L3+B	L3+C	nD-L3	nD-L3+A	nD-L3+B	nD-L3+C	DR	RP3	RQ3	RL3	nD-RL3	ND2	2ph-TDA	3+	NR2	BD-T1	ADC(3)	NRP3	NRQ3	NRL3
				0.570476	-0.499566	-0.0832344	-0.526247	-0.0953999	0.55565	-0.0205956	0.178591	0.214374	0.557271	-0.0312858	0.169232	0.206254	0.25852	0.0997252	0.16042	0.030349	0.206608	-0.0705561	0.0715856	0.0724804	0.198382	-0.0864914	0.0597167	0.0607001	0.119499	-0.0802753	-0.100765	-0.0337409	-0.052674	-0.518939	-0.530239	0.214143	-0.0848964	0.0526783	0.140667	-0.0759666	-0.114856	-0.0489077
				0.636076	0.467721	0.252975	0.48843	0.25831	0.77378	0.195634	0.307854	0.267067	0.790874	0.20244	0.310903	0.269066	0.438001	0.295167	0.43671	0.24112	0.33923	0.146966	0.166268	0.153865	0.33155	0.131438	0.154166	0.139203	0.232755	0.142937	0.157941	0.0907984	0.0863049	0.251309	0.245147	0.323581	0.117199	0.0920457	0.239723	0.135036	0.158605	0.0989121
	Statistics for absolute deviations from CCST(T) All 55 VEDEs.			KT	D2	os-D2	nD-D2	os-nD-D2	D3	OVGF-A	OVGF-B	OVGF-C	nD-D3	nD-OVGF-A	nD-OVGF-B	nD-OVGF-C	P3	P3+	Q3	Q3+	L3	L3+A	L3+B	L3+C	nD-L3	nD-L3+A	nD-L3+B	nD-L3+C	DR	RP3	RQ3	RL3	nD-RL3	ND2	2ph-TDA	3+	NR2	BD-T1	ADC(3)	NRP3	NRQ3	NRL3
				0.640089	0.503372	0.1849	0.529811	0.189779	0.57464	0.135927	0.22135	0.233938	0.574252	0.141675	0.218199	0.224017	0.304586	0.166778	0.28155	0.162551	0.223101	0.125116	0.096381	0.0967618	0.214423	0.124359	0.0838908	0.0834263	0.207396	0.136098	0.165601	0.0797039	0.0884877	0.518939	0.530239	0.231894	0.130574	0.0734178	0.19849	0.136074	0.175476	0.0854781
				2.07562	2.05629	0.868774	2.12064	0.899774	3.46447	0.878398	1.6626	1.35798	3.50058	0.867342	1.66325	1.35433	2.10902	1.83611	1.67482	0.956185	1.44531	0.458394	0.753035	0.664944	1.45102	0.391059	0.737035	0.647648	0.821318	0.590574	0.405906	0.247707	0.223923	1.31161	1.12816	1.41292	0.25346	0.372864	0.806864	0.431881	0.382895	0.347961
[truncated: 109 more columns]

## Sheet: Quartic_CBS-a23-VEDEs_Extrapola
				aDZ	aTZ	CBS	aDZ	aTZ	CBS	aDZ	aTZ	CBS	aDZ	aTZ	CBS	aDZ	aTZ	CBS	aDZ	aTZ	CBS	aDZ	aTZ	CBS	aDZ	aTZ	CBS	aDZ	aTZ	CBS	aDZ	aTZ	CBS	aDZ	aTZ	CBS	aDZ	aTZ	CBS	aDZ	aTZ	CBS	aDZ	aTZ	CBS	aDZ	aTZ	CBS	aDZ
Anions	CCSD(T) VEDE	Final State		KT			D2			os-D2			nD-D2			os-nD-D2			D3			OVGF-A			OVGF-B			OVGF-C			nD-D3			nD-OVGF-A			nD-OVGF-B			nD-OVGF-C			P3			P3+			Q3
AlH4–	4.91	2-4 2T2		5.362	5.395	5.40661	4.813	4.966	5.01984	5.028	5.175	5.22673	4.805	4.959	5.01319	5.023	5.172	5.22444	4.85	4.957	4.99465	4.835	4.962	5.00669	4.976	5.082	5.1193	4.906	4.948	4.96278	4.84	4.948	4.98601	4.826	4.954	4.99905	4.967	5.074	5.11165	4.893	4.935	4.94978	4.621	4.779	4.8346	4.631	4.79	4.84595	4.615
AlO–	3.45	3-4 2Π		4.655	4.669	4.67393	1.52	1.733	1.80796	2.469	2.643	2.70423	1.428	1.644	1.72001	2.423	2.598	2.65959	X	7.442	#VALUE!	X	4.01	#VALUE!	X	4.909	#VALUE!	X	4.531	#VALUE!	X	X	#VALUE!	X	X	#VALUE!	X	X	#VALUE!	X	X	#VALUE!	4.216	4.485	4.57966	3.582	3.823	3.90781	4.944
	2.7	5 2Σ		2.76	2.752	2.74918	2.194	2.306	2.34541	2.452	2.551	2.58584	2.179	2.294	2.33447	2.446	2.546	2.58119	3.087	3.133	3.14919	2.588	2.606	2.61233	2.937	2.973	2.98567	2.908	2.959	2.97695	3.099	3.147	3.16389	2.585	2.603	2.60933	2.944	2.982	2.99537	2.914	2.967	2.98565	2.635	2.759	2.80264	2.566	2.686	2.72823	2.689
AlS–	3.45	3-4 2Π		3.812	3.803	3.79983	2.808	2.963	3.01755	3.132	3.255	3.29829	2.779	2.939	2.99531	3.118	3.242	3.28564	3.724	3.741	3.74698	3.319	3.329	3.33252	3.558	3.575	3.58098	3.531	3.581	3.5986	3.721	3.739	3.74533	3.307	3.318	3.32187	3.55	3.567	3.57298	3.522	3.573	3.59095	3.196	3.341	3.39203	3.144	3.288	3.33868	3.294
	2.77	5 2Σ		2.804	2.796	2.79318	2.43	2.538	2.57601	2.646	2.741	2.77443	2.42	2.53	2.56871	2.642	2.739	2.77314	2.748	2.802	2.821	2.555	2.611	2.63071	2.767	2.818	2.83595	2.74	2.791	2.80895	2.746	2.802	2.82171	2.549	2.606	2.62606	2.765	2.819	2.838	2.737	2.791	2.81	2.524	2.64	2.68082	2.513	2.626	2.66577	2.502
BH4–	4.68	2-4 2T2		5.164	5.187	5.19509	4.347	4.498	4.55114	4.699	4.837	4.88556	4.334	4.486	4.53949	4.692	4.832	4.88127	4.667	4.723	4.74271	4.528	4.608	4.63615	4.699	4.747	4.76389	4.673	4.722	4.73924	4.656	4.713	4.73306	4.517	4.598	4.62651	4.689	4.737	4.75389	4.662	4.712	4.7296	4.372	4.531	4.58695	4.37	4.528	4.5836	4.358
BO–	5.77	3-4 2Π		6.867	6.857	6.85348	4.533	4.711	4.77364	5.285	5.425	5.47427	4.474	4.655	4.7187	5.256	5.398	5.44797	7.116	7.094	7.08626	6.075	6.031	6.01552	6.499	6.44	6.41924	6.342	6.361	6.36769	7.122	7.099	7.09091	6.061	6.016	6.00016	6.49	6.431	6.41024	6.331	6.349	6.35533	5.852	6.07	6.14672	5.636	5.841	5.91314	6.18
	2.56	5 2Σ		2.964	2.972	2.97482	2.348	2.488	2.53727	2.507	2.632	2.67599	2.335	2.477	2.52697	2.498	2.625	2.66969	2.481	2.577	2.61078	2.414	2.524	2.56271	2.522	2.601	2.6288	2.484	2.575	2.60702	2.466	2.564	2.59849	2.401	2.513	2.55241	2.507	2.588	2.61651	2.468	2.563	2.59643	2.409	2.57	2.62666	2.402	2.561	2.61695	2.321
BS–	4.47	3-4 2Π		4.641	4.634	4.63154	4.039	4.21	4.27018	4.24	4.376	4.42386	4.021	4.197	4.25894	4.232	4.37	4.41856	4.509	4.558	4.57524	4.281	4.339	4.35941	4.444	4.492	4.50889	4.44	4.508	4.53193	4.504	4.555	4.57295	4.272	4.332	4.35311	4.438	4.487	4.50424	4.434	4.504	4.52863	4.201	4.367	4.42542	4.184	4.349	4.40707	4.264
	2.45	5 2Σ		3.092	3.086	3.08389	2.167	2.301	2.34816	2.505	2.625	2.66723	2.145	2.281	2.32886	2.493	2.615	2.65793	2.446	2.526	2.55415	2.307	2.398	2.43002	2.406	2.471	2.49387	2.413	2.496	2.52521	2.424	2.507	2.53621	2.286	2.379	2.41173	2.381	2.448	2.47158	2.391	2.475	2.50456	2.331	2.484	2.53784	2.308	2.456	2.50808	2.211
CH3–	0.41	4 2A1		0.683	0.713	0.723557	-0.238	-0.077	-0.0203418	-0.062	0.066	0.111045	-0.262	-0.1	-0.0429899	-0.078	0.051	0.096397	0.513	0.611	0.645488	0.162	0.238	0.264745	0.35	0.413	0.435171	0.363	0.46	0.494136	0.508	0.607	0.64184	0.149	0.227	0.254449	0.34	0.403	0.425171	0.352	0.451	0.48584	0.176	0.417	0.501811	0.121	0.347	0.426533	0.194
Cl–	3.69	2-4 2Tu		4.096	4.091	4.08924	2.905	3.079	3.14023	3.287	3.416	3.4614	2.884	3.057	3.11788	3.276	3.405	3.4504	3.852	3.879	3.8885	3.494	3.505	3.50887	3.704	3.734	3.74456	3.683	3.74	3.76006	3.847	3.874	3.8835	3.484	3.494	3.49752	3.695	3.725	3.73556	3.673	3.732	3.75276	3.349	3.501	3.55449	3.297	3.449	3.50249	3.435
CN–	3.95	3 2Σ		5.238	5.257	5.26369	3.292	3.492	3.56238	3.93	4.11	4.17334	3.255	3.457	3.52809	3.912	4.093	4.1567	4.117	4.221	4.2576	3.769	3.836	3.85958	3.788	3.862	3.88804	3.899	4.021	4.06393	4.093	4.198	4.23495	3.743	3.851	3.88901	3.757	3.83	3.85569	3.871	3.994	4.03729	3.908	4.142	4.22435	3.807	4.031	4.10983	3.777
	5.12	4-5 2Π		5.23	5.226	5.22459	4.548	4.74	4.80757	4.838	4.992	5.04619	4.526	4.724	4.79368	4.829	4.986	5.04125	5.266	5.288	5.29574	4.865	4.919	4.938	5.026	5.023	5.02194	5.079	5.139	5.16011	5.267	5.29	5.29809	4.856	4.911	4.93036	5.02	5.016	5.01459	5.075	5.136	5.15747	5.141	5.364	5.44248	5.06	5.274	5.34931	5.167
CP–	2.95	3 2Σ		4.39	4.382	4.37918	2.381	2.516	2.56351	3.12	3.245	3.28899	2.331	2.466	2.51351	3.097	3.222	3.26599	3.395	3.473	3.50045	2.88	2.944	2.96652	2.773	2.811	2.82437	3.033	3.125	3.15738	3.367	3.446	3.4738	2.845	2.91	2.93287	2.729	2.766	2.77902	2.997	3.089	3.12138	3.298	3.47	3.53053	3.098	3.256	3.3116	3.032
	3.74	4-5 2Π		3.455	3.44	3.43472	3.484	3.627	3.67732	3.521	3.636	3.67647	3.485	3.636	3.68914	3.523	3.643	3.68523	3.549	3.594	3.60984	3.481	3.638	3.69325	3.441	3.469	3.47885	3.533	3.603	3.62763	3.553	3.601	3.61789	3.482	3.648	3.70642	3.44	3.47	3.48056	3.537	3.61	3.63569	3.738	3.899	3.95566	3.706	3.861	3.91555	3.681
F–	3.44	2-4 2Tu		4.931	4.924	4.92154	1.025	1.215	1.28186	2.272	2.418	2.46938	0.962	1.151	1.21751	2.241	2.387	2.43838	6.612	6.753	6.80262	4.322	4.244	4.21655	5.067	5.018	5.00076	4.638	4.681	4.69613	6.64	6.787	6.83873	4.315	4.234	4.20549	5.069	5.019	5.0014	4.633	4.677	4.69248	3.786	4.147	4.27404	3.261	3.562	3.66793	4.496
HAlCl–	2	6 2A'		1.854	1.852	1.8513	1.698	1.819	1.86158	1.827	1.937	1.97571	1.694	1.818	1.86164	1.827	1.939	1.97841	1.86	1.938	1.96545	1.742	1.826	1.85556	1.995	2.071	2.09775	1.92	1.975	1.99436	1.86	1.941	1.96951	1.739	1.826	1.85662	2.002	2.081	2.1088	1.923	1.98	2.00006	1.647	1.78	1.8268	1.651	1.783	1.82945	1.632
HAlP–	3.9	3 2Σ		4.309	4.278	4.26709	3.195	3.308	3.34777	3.638	3.734	3.76778	3.159	3.275	3.31582	3.622	3.719	3.75314	4.42	4.423	4.42406	3.774	3.761	3.75643	4.079	4.077	4.0763	4.063	4.098	4.11032	4.424	4.429	4.43076	3.761	3.747	3.74207	4.07	4.069	4.06865	4.054	4.091	4.10402	3.786	3.903	3.94417	3.677	3.79	3.82977	3.848
	2.26	4-5 2Π		2.062	2.063	2.06335	1.634	1.763	1.8084	1.796	1.904	1.94201	1.616	1.75	1.79716	1.788	1.899	1.93806	2.381	2.407	2.41615	1.916	1.932	1.93763	2.211	2.229	2.23533	2.201	2.251	2.2686	2.395	2.423	2.43285	1.912	1.928	1.93363	2.218	2.237	2.24369	2.207	2.259	2.2773	1.99	2.125	2.17251	1.936	2.067	2.1131	2.07
HBF–	0.62	6 2A'		0.793	0.817	0.825446	0.194	0.337	0.387324	0.344	0.468	0.511637	0.179	0.325	0.37638	0.334	0.46	0.504341	0.505	0.614	0.652359	0.362	0.46	0.494488	0.563	0.655	0.687376	0.529	0.622	0.654728	0.494	0.607	0.646766	0.351	0.451	0.486191	0.554	0.649	0.682432	0.519	0.614	0.647432	0.255	0.452	0.521327	0.25	0.442	0.509568	0.249
HBN–	3.9	3 2Σ		5.86	5.83	5.81944	2.199	2.352	2.40584	3.462	3.592	3.63775	2.126	2.279	2.33284	3.428	3.558	3.60375	6.465	6.468	6.46906	4.211	4.172	4.15828	4.579	4.51	4.48572	4.537	4.576	4.58972	6.48	6.485	6.48676	4.187	4.146	4.13157	4.553	4.483	4.45837	4.511	4.55	4.56372	4.518	4.746	4.82624	3.929	4.123	4.19127	4.641
	3.08	4-5 2Π		3.111	3.116	3.11776	2.146	2.309	2.36636	2.499	2.633	2.68016	2.111	2.279	2.33812	2.482	2.62	2.66856	3.695	3.702	3.70446	2.819	2.818	2.81765	3.167	3.141	3.13185	3.176	3.221	3.23684	3.716	3.724	3.72682	2.812	2.811	2.81065	3.169	3.142	3.1325	3.178	3.225	3.24154	3.185	3.393	3.4662	2.995	3.188	3.25592	3.291
HCC–	3.11	3 2Σ		4.653	4.671	4.67733	2.427	2.616	2.68251	3.151	3.323	3.38353	2.381	2.571	2.63786	3.127	3.3	3.36088	3.511	3.604	3.63673	3.025	3.118	3.15073	3.081	3.137	3.15671	3.197	3.307	3.34571	3.482	3.576	3.60908	2.992	3.085	3.11773	3.041	3.098	3.11806	3.161	3.273	3.31241	3.149	3.381	3.46264	3.017	3.234	3.31037	3.005
	3.47	4-5 2Π		3.419	3.417	3.4163	2.966	3.14	3.20123	3.189	3.329	3.37827	2.95	3.13	3.19334	3.183	3.327	3.37768	3.52	3.539	3.54569	3.163	3.229	3.25223	3.317	3.313	3.31159	3.386	3.436	3.4536	3.524	3.543	3.54969	3.156	3.224	3.24793	3.314	3.31	3.30859	3.385	3.437	3.4553	3.458	3.662	3.73379	3.389	3.585	3.65398	3.428
HCO–	0.64	6 2A'		1.181	1.212	1.22291	-0.184	0.044	0.124236	0.326	0.524	0.593679	-0.216	0.016	0.0976441	0.31	0.511	0.581735	0.823	0.933	0.971711	0.392	0.495	0.531247	0.593	0.681	0.711968	0.606	0.731	0.774989	0.813	0.925	0.964414	0.376	0.479	0.515247	0.577	0.665	0.695968	0.59	0.717	0.761693	0.377	0.637	0.728498	0.299	0.55	0.638331	0.396
HNB–	4.19	3-4 2Π		4.888	4.895	4.89746	3.265	3.45	3.5151	3.812	3.965	4.01884	3.22	3.408	3.47416	3.791	3.945	3.99919	4.894	4.898	4.89941	4.163	4.169	4.17111	4.472	4.447	4.4382	4.433	4.474	4.48843	4.895	4.898	4.89906	4.148	4.154	4.15611	4.461	4.435	4.42585	4.42	4.462	4.47678	4.141	4.746	4.95891	4.001	4.123	4.16593	4.641
	1.88	5 2Σ		2.409	2.418	2.42117	1.616	1.756	1.80527	1.821	1.947	1.99134	1.597	1.74	1.79032	1.809	1.937	1.98205	1.883	1.977	2.01008	1.754	1.853	1.88784	1.9	1.974	2.00004	1.874	1.961	1.99162	1.866	1.962	1.99578	1.737	1.839	1.8749	1.882	1.958	1.98475	1.856	1.946	1.97767	1.713	3.393	3.98422	1.701	3.188	3.7113	3.291
HNF–	4.27	6 2A'		5.406	5.4	5.39789	2.963	3.166	3.23744	3.888	4.06	4.12053	2.914	3.118	3.18979	3.865	4.039	4.10023	5.058	5.115	5.13506	4.217	4.241	4.24945	4.538	4.55	4.55422	4.486	4.562	4.58875	5.051	5.108	5.12806	4.197	4.221	4.22945	4.519	4.53	4.53387	4.466	4.543	4.5701	4.065	4.327	4.4192	3.889	4.134	4.22022	4.219
	1.27	7 2A''		2.47	2.487	2.49298	0.191	0.433	0.518163	0.898	1.107	1.18055	0.145	0.389	0.474867	0.874	1.084	1.1579	1.669	1.79	1.83258	1.094	1.189	1.22243	1.263	1.342	1.3698	1.286	1.424	1.47256	1.65	1.774	1.81764	1.068	1.164	1.19778	1.236	1.316	1.34415	1.26	1.4	1.44927	1.075	1.374	1.47922	0.94	1.223	1.32259	1.102
HOO–	2.15	6 2A'		3.966	3.965	3.96465	0.576	0.798	0.876125	1.74	1.926	1.99146	0.512	0.736	0.814829	1.709	1.896	1.96181	3.391	3.477	3.50726	2.256	2.295	2.30872	2.555	2.578	2.58609	2.494	2.598	2.6346	3.38	3.467	3.49762	2.23	2.269	2.28272	2.529	2.552	2.56009	2.467	2.572	2.60895	2.136	2.429	2.53211	1.853	2.124	2.21937	2.305
	1.58	7 2A''		3.254	3.269	3.27428	-0.187	0.065	0.153682	0.99	1.204	1.27931	-0.253	0	0.0890343	0.959	1.173	1.24831	2.762	2.858	2.89178	1.584	1.634	1.6516	1.916	1.951	1.96332	1.822	1.942	1.98423	2.753	2.85	2.88414	1.558	1.608	1.6256	1.892	1.926	1.93797	1.796	1.916	1.95823	1.397	1.719	1.83232	1.112	1.411	1.51622	1.617
HPAl–	2.44	4 2A''		2.46	2.465	2.46676	2.031	2.192	2.24866	2.158	2.294	2.34186	2.016	2.182	2.24042	2.15	2.29	2.33927	2.419	2.486	2.50958	2.198	2.274	2.30075	2.372	2.437	2.45987	2.372	2.45	2.47745	2.418	2.487	2.51128	2.191	2.268	2.2951	2.368	2.436	2.45993	2.369	2.449	2.47715	2.165	2.335	2.39483	2.15	2.317	2.37577	2.186
	2.22	5 2A'		2.243	2.24	2.23894	1.857	1.982	2.02599	2.074	2.185	2.22406	1.846	1.974	2.01905	2.07	2.184	2.22412	2.157	2.22	2.24217	1.976	2.046	2.07063	2.163	2.228	2.25087	2.144	2.208	2.23052	2.154	2.219	2.24187	1.969	2.041	2.06634	2.16	2.227	2.25058	2.14	2.207	2.23058	1.948	2.082	2.12916	1.938	2.069	2.1151	1.922
HPCl–	4.69	6 2A'		5.177	5.174	5.17294	4.144	4.319	4.38059	4.587	4.739	4.79249	4.121	4.298	4.36029	4.577	4.731	4.78519	4.696	4.782	4.81226	4.457	4.538	4.56651	4.634	4.72	4.75026	4.629	4.726	4.76014	4.682	4.77	4.80097	4.441	4.523	4.55186	4.619	4.706	4.73662	4.613	4.712	4.74684	4.326	4.509	4.5734	4.304	4.485	4.5487	4.333
	1.7	7 2A''		1.836	1.841	1.84276	1.184	1.386	1.45709	1.423	1.598	1.65959	1.169	1.374	1.44614	1.416	1.593	1.65529	1.544	1.682	1.73056	1.369	1.496	1.54069	1.511	1.653	1.70297	1.51	1.655	1.70603	1.535	1.677	1.72697	1.358	1.488	1.53375	1.501	1.646	1.69703	1.5	1.649	1.70144	1.312	1.526	1.60131	1.297	1.509	1.58361	1.295
HSiS–	4.06	5 2A"		4.221	4.21	4.20613	3.527	3.682	3.73655	3.75	3.87	3.91223	3.505	3.664	3.71995	3.739	3.861	3.90393	4.128	4.158	4.16856	3.836	3.87	3.88197	4.032	4.06	4.06985	4.025	4.078	4.09665	4.125	4.156	4.16691	3.826	3.861	3.87332	4.026	4.055	4.06521	4.018	4.073	4.09236	3.755	3.903	3.95508	3.728	3.875	3.92673	3.824
	2.42	6 2A'		2.541	2.567	2.57615	1.827	2.036	2.10955	2.171	2.355	2.41975	1.808	2.021	2.09596	2.163	2.35	2.41581	2.32	2.444	2.48764	2.073	2.194	2.23658	2.268	2.397	2.4424	2.261	2.397	2.44486	2.313	2.439	2.48334	2.062	2.185	2.22829	2.258	2.391	2.4378	2.252	2.391	2.43992	2	2.207	2.27985	1.978	2.184	2.25649	1.999
HSiSi–	2.44	4 2A"		2.082	2.079	2.07794	2.062	2.181	2.22288	2.129	2.23	2.26554	2.061	2.186	2.22999	2.131	2.236	2.27295	2.232	2.277	2.29284	2.068	2.166	2.20049	2.174	2.214	2.22808	2.206	2.262	2.28171	2.24	2.288	2.30489	2.068	2.17	2.2059	2.178	2.222	2.23748	2.213	2.272	2.29276	2.206	2.333	2.37769	2.187	2.311	2.35464	2.162
	2.4	5 2A'		2.003	2.003	2.003	2.079	2.202	2.24529	2.107	2.211	2.2476	2.082	2.212	2.25775	2.111	2.219	2.25701	2.206	2.254	2.27089	2.058	2.181	2.22429	2.159	2.203	2.21848	2.189	2.246	2.26606	2.217	2.268	2.28595	2.06	2.188	2.23305	2.168	2.214	2.23019	2.198	2.26	2.28182	2.202	2.334	2.38045	2.186	2.316	2.36175	2.164
HSS–	2.88	6 2A'		3.295	3.296	3.29635	2.153	2.35	2.41933	2.583	2.745	2.80201	2.128	2.326	2.39568	2.571	2.734	2.79136	2.933	3.037	3.0736	2.596	2.678	2.70686	2.782	2.885	2.92125	2.78	2.905	2.94899	2.923	3.029	3.0663	2.581	2.664	2.69321	2.768	2.872	2.9086	2.766	2.893	2.93769	2.5	2.694	2.76227	2.453	2.645	2.71257	2.534
	2.14	7 2A''		2.425	2.434	2.43717	1.379	1.601	1.67912	1.79	1.976	2.04146	1.354	1.579	1.65818	1.779	1.967	2.03316	2.104	2.226	2.26893	1.786	1.888	1.9239	1.971	2.094	2.13729	1.969	2.114	2.16503	2.095	2.219	2.26264	1.772	1.875	1.91125	1.958	2.083	2.12699	1.957	2.104	2.15573	1.693	1.91	1.98637	1.652	1.867	1.94266	1.726
NH2–	0.75	4 2B1		1.308	1.337	1.34721	-0.501	-0.295	-0.222506	-0.023	0.141	0.198714	-0.548	-0.34	-0.266802	-0.049	0.115	0.172714	1.524	1.642	1.68353	0.634	0.685	0.702948	0.964	1.011	1.02754	0.906	1.021	1.06147	1.53	1.651	1.69358	0.621	0.671	0.688596	0.956	1.003	1.01954	0.896	1.013	1.05417	0.646	0.959	1.06915	0.448	0.732	0.831944	0.813
OCl–	2.55	6-7 2Π		3.871	3.87	3.86965	1.324	1.566	1.65116	2.243	2.438	2.50662	1.272	1.514	1.59916	2.219	2.416	2.48533	3.456	3.562	3.5993	2.587	2.649	2.67082	2.858	2.927	2.95128	2.817	2.952	2.99951	3.447	3.555	3.59301	2.565	2.627	2.64882	2.837	2.906	2.93028	2.795	2.931	2.97886	2.486	2.761	2.85778	2.286	2.548	2.6402	2.614
OF–	2.7	6-7 2Π		4.693	4.687	4.68489	1.311	1.54	1.62059	2.464	2.657	2.72492	1.254	1.484	1.56494	2.437	2.63	2.69792	3.6	3.684	3.71356	2.74	2.793	2.81165	2.935	2.969	2.98097	2.934	3.041	3.07865	3.581	3.665	3.69456	2.712	2.764	2.7823	2.905	2.938	2.94961	2.904	3.012	3.05001	2.661	2.946	3.0463	2.437	2.704	2.79796	2.737
OH–	1.84	3-4 2π		2.945	2.962	2.96798	-0.166	0.029	0.0976233	0.785	0.944	0.999954	-0.234	-0.038	0.0309752	0.751	0.91	0.965954	4.212	4.408	4.47698	2.259	2.243	2.23737	2.867	2.871	2.87241	2.587	2.682	2.71543	4.239	4.442	4.51344	2.248	2.231	2.22502	2.865	2.869	2.87041	2.581	2.676	2.70943	2.103	2.476	2.60726	1.64	1.951	2.06045	2.578
PH2–	1.26	4 2B1		1.214	1.234	1.24104	0.81	0.998	1.06416	0.894	1.054	1.11031	0.8	0.991	1.05822	0.888	1.05	1.10701	1.106	1.227	1.26958	0.946	1.063	1.10417	1.101	1.227	1.27134	1.094	1.218	1.26164	1.102	1.227	1.27099	0.94	1.058	1.09953	1.097	1.227	1.27275	1.09	1.217	1.26169	0.888	1.092	1.16379	0.881	1.082	1.15273	0.891
SCl–	2.8	6-7 2Π		3.232	3.218	3.21307	2.114	2.304	2.37086	2.545	2.7	2.75455	2.09	2.281	2.34822	2.534	2.69	2.7449	2.76	2.863	2.89925	2.486	2.572	2.60226	2.637	2.742	2.77895	2.646	2.768	2.81093	2.747	2.853	2.8903	2.47	2.557	2.58762	2.621	2.728	2.76565	2.63	2.755	2.79899	2.414	2.6	2.66546	2.375	2.559	2.62375	2.416
SF–	2.57	6-7 2Π		2.983	2.977	2.97489	1.941	2.138	2.20733	2.312	2.476	2.53371	1.92	2.119	2.18903	2.302	2.467	2.52507	2.531	2.64	2.67836	2.297	2.388	2.42002	2.44	2.555	2.59547	2.446	2.572	2.61634	2.519	2.63	2.66906	2.283	2.375	2.40738	2.426	2.542	2.58282	2.433	2.561	2.60605	2.237	2.429	2.49657	2.204	2.394	2.46086	2.239
SH–	2.36	3-4 2Π		2.576	2.584	2.58682	1.699	1.882	1.9464	1.966	2.116	2.16879	1.679	1.864	1.9291	1.956	2.107	2.16014	2.39	2.479	2.51032	2.093	2.158	2.18087	2.288	2.377	2.40832	2.28	2.387	2.42465	2.385	2.476	2.50802	2.083	2.149	2.17223	2.28	2.371	2.40302	2.272	2.381	2.41936	2.008	2.195	2.26081	1.972	2.156	2.22075	2.053
SiH3–	1.87	4 2A'		1.831	1.836	1.83776	1.521	1.675	1.72919	1.632	1.771	1.81992	1.513	1.671	1.7266	1.628	1.77	1.81997	1.737	1.835	1.86949	1.608	1.711	1.74725	1.812	1.918	1.9553	1.769	1.857	1.88797	1.734	1.835	1.87054	1.602	1.708	1.7453	1.811	1.922	1.96106	1.767	1.858	1.89002	1.51	1.671	1.72766	1.511	1.671	1.72731	1.5
SiN–	3.06	3 2Σ		2.927	2.905	2.89726	1.966	2.084	2.12553	2.277	2.371	2.40408	1.911	2.036	2.07999	2.249	2.348	2.38284	4.449	4.432	4.42602	2.763	2.714	2.69676	3.207	3.13	3.1029	3.218	3.244	3.25315	4.523	4.51	4.50543	2.756	2.706	2.6884	3.219	3.14	3.1122	3.231	3.259	3.26885	3.692	3.874	3.93805	3.234	3.386	3.43949	3.881
	3.26	4-5 2Π		4.193	4.205	4.20922	1.938	2.042	2.0786	2.794	2.902	2.94001	1.866	1.97	2.0066	2.762	2.87	2.90801	5.597	5.778	5.8417	3.296	3.284	3.27978	3.521	3.501	3.49396	3.65	3.724	3.75004	5.649	5.843	5.91127	3.278	3.264	3.25907	3.502	3.478	3.46955	3.633	3.706	3.73169	4.229	4.461	4.54264	3.528	3.697	3.75647	4.222
SiP–	3.15	3 2Σ		3.586	3.571	3.56572	2.754	2.875	2.91758	3.13	3.237	3.27465	2.727	2.851	2.89464	3.12	3.229	3.26736	3.303	3.368	3.39087	2.999	3.056	3.07606	3.077	3.135	3.15541	3.158	3.238	3.26615	3.292	3.36	3.38393	2.983	3.041	3.06141	3.059	3.118	3.13876	3.142	3.225	3.25421	3.156	3.285	3.3304	3.086	3.211	3.25499	3.07
	3.1	4-5 2Π		2.65	2.638	2.63378	2.574	2.697	2.74029	2.627	2.727	2.76219	2.57	2.7	2.74575	2.626	2.73	2.7666	2.869	2.909	2.92308	2.61	2.679	2.70328	2.77	2.799	2.80921	2.806	2.863	2.88306	2.88	2.923	2.93813	2.608	2.68	2.70534	2.776	2.808	2.81926	2.813	2.875	2.89682	2.785	2.919	2.96616	2.757	2.887	2.93275	2.799
[truncated: 74 more columns]

## Sheet: Quartic_CBS-a34-VEDEs
							CCSD(T)/ CBS-a34 Versus EPT/ CBS-a34
Anions	CCSD(T) VEDE	Final State		KT	D2	PS(D2)	os-D2	PS(os-D2)	nD-D2	PS(nD-D2)	os-nD-D2	PS(os-nD-D2)	D3	PS(D3)	OVGF-A	PS(OVGF-A)	OVGF-B	PS(OVGF-B)	OVGF-C	PS(OVGF-C)	nD-D3	PS(nD-D3)	nD-OVGF-A	PS(nD-OVGF-A)	nD-OVGF-B	PS(nD-OVGF-B)	nD-OVGF-C	PS(nD-OVGF-C)	P3	PS(P3)	P3+	PS(P3+)	Q3	PS(Q3)	Q3+	PS(Q3+)	L3	PS(L3)	L3+A	PS(L3+A)	L3+B	PS(L3+B)	L3+C	PS(L3+C)	nD-L3	PS(nD-L3)	nD-L3+A	PS(nD-L3+A)	nD-L3+B
AlH4–	4.91154	2-4 2T2		5.40289	5.03697		5.2444		5.03155		5.2414		4.98697		5.01405		5.1025		4.93223		4.97797		5.00762		5.09608		4.91923		4.85313		4.8657		4.81451		4.82709		4.94485		4.98062		4.9787		4.97958		4.93585		4.97262		4.9697
AlO–	3.44886	3-4 2Π		4.67689	1.89387		2.78968		1.80803		2.74783		7.46723		3.93903		4.84118		4.54046		X		X		X		X		4.68688		4.0028		5.14452		4.41417		4.89928		3.83474		4.19651		4.11801		4.90586		3.81374		4.18366
	2.69731	5 2Σ		2.74727	2.38644		2.62197		2.37601		2.62013		3.14246		2.61704		2.97615		2.97635		3.15804		2.61404		2.98515		2.98435		2.83944		2.76328		2.83578		2.76178		2.90739		2.63093		2.83966		2.83639		2.91297		2.6295		2.84323
AlS–	3.43463	3-4 2Π		3.80615	3.1081		3.39064		3.0841		3.38079		3.82144		3.39051		3.64597		3.66932		3.82101		3.37951		3.63955		3.66448		3.50187		3.44572		3.48013		3.42398		3.53694		3.35374		3.48378		3.48452		3.52867		3.3409		3.47236
	2.75309	5 2Σ		2.79915	2.63105		2.82774		2.62621		2.8289		2.84616		2.66936		2.85427		2.83358		2.84931		2.66593		2.85685		2.83516		2.74094		2.72694		2.66744		2.65286		2.77862		2.67578		2.77989		2.77647		2.77878		2.67336		2.78005
BH4–	4.66577	2-4 2T2		5.19173	4.57686		4.9127		4.56644		4.9077		4.73719		4.64901		4.75331		4.73304		4.72877		4.63901		4.74331		4.72304		4.61459		4.61001		4.53036		4.52736		4.64012		4.61574		4.64839		4.64397		4.6297		4.60474		4.63797
BO–	5.75886	3-4 2Π		6.85385	4.8561		5.55748		4.80325		5.53206		7.12712		6.04204		6.44789		6.41305		7.13527		6.02704		6.43731		6.40262		6.24507		6.0066		6.38209		6.14221		6.24944		5.81809		6.00997		5.99059		6.23401		5.79566		5.98955
	2.55154	5 2Σ		2.97515	2.5637		2.70297		2.55428		2.69755		2.61012		2.5792		2.61993		2.60812		2.60027		2.56978		2.6085		2.59612		2.65674		2.64617		2.52697		2.51482		2.63501		2.60047		2.63927		2.63485		2.62501		2.59262		2.62985
BS–	4.45463	3-4 2Π		4.63085	4.34721		4.50217		4.33737		4.49933		4.63213		4.41944		4.55982		4.59001		4.63228		4.41244		4.55797		4.58917		4.51683		4.49725		4.47498		4.45382		4.51963		4.4169		4.50148		4.50363		4.51578		4.41105		4.49763
	2.44309	5 2Σ		3.08285	2.38774		2.70701		2.36932		2.69859		2.56858		2.45636		2.49781		2.54016		2.55116		2.43893		2.47639		2.52231		2.58021		2.55063		2.40328		2.37213		2.51531		2.4572		2.49901		2.50574		2.49689		2.43978		2.48058
CH3–	0.407315	4 2A1		0.736657	-0.00287332		0.125932		-0.022719		0.110932		0.688281		0.290046		0.452429		0.523087		0.685858		0.277469		0.444006		0.517241		0.581025		0.495253		0.493173		0.408979		0.51763		0.309972		0.433281		0.445167		0.510784		0.29855		0.424435
Cl–	3.66772	2-4 2Tu		4.08942	3.25091		3.57529		3.23049		3.56745		4.02252		3.60121		3.86964		3.88668		4.02068		3.59178		3.86379		3.88183		3.69657		3.63826		3.66298		3.60468		3.76041		3.57102		3.71025		3.70883		3.75156		3.5596		3.70041
CN–	3.93309	3 2Σ		5.26015	3.60556		4.21567		3.57371		4.20025		4.26831		3.95902		3.89039		4.08093		4.24531		3.90936		3.85997		4.05393		4.27448		4.15717		4.03563		3.91932		4.05282		3.9044		3.93793		3.9764		4.0274		3.87797		3.90951
	5.11309	4-5 2Π		5.22442	4.8709		5.11029		4.85806		5.10744		5.31954		4.97893		5.03719		5.19105		5.32154		4.97251		5.03177		5.1912		5.51541		5.42068		5.39536		5.30163		5.25682		5.02551		5.16209		5.18555		5.2574		5.02109		5.15966
CP–	2.93886	3 2Σ		4.38515	2.62009		3.34752		2.57167		3.32609		3.5282		3.00236		2.83781		3.19124		3.50278		2.96836		2.79439		3.15682		3.60248		3.37902		3.22848		3.01159		3.22824		2.98666		3.0092		3.0894		3.19582		2.95224		2.97178
	3.75731	4-5 2Π		3.43685	3.73582		3.73852		3.74956		3.74867		3.63658		3.7831		3.49739		3.66293		3.64516		3.80414		3.49997		3.67309		4.02517		3.98402		3.87048		3.82974		3.78151		3.54943		3.73878		3.77182		3.79666		3.52866		3.75193
F–	3.4204	2-4 2Tu		4.92558	1.37745		2.56783		1.3166		2.53841		7.00219		4.24242		5.07478		4.78352		7.0425		4.23085		5.07578		4.77794		4.4372		3.80488		4.92349		4.25703		4.78499		3.79382		4.1291		4.05172		4.78215		3.7764		4.11468
HAlCl–	1.99154	6 2A'		1.85673	1.8884		2.00166		1.88897		2.00524		1.96639		1.8812		2.08519		1.98604		1.97097		1.8812		2.09519		1.99262		1.85728		1.86028		1.80766		1.81224		1.9467		1.87731		1.97539		1.96466		1.95027		1.87731		1.97939
HAlP–	3.88731	3 2Σ		4.27958	3.41525		3.83967		3.3854		3.82782		4.44823		3.78623		4.08646		4.13743		4.45581		3.77381		4.07846		4.13201		4.03233		3.90986		3.97286		3.85355		4.0252		3.74331		3.90774		3.9142		4.01478		3.72689		3.89489
	2.26309	4-5 2Π		2.06458	1.87182		2.00652		1.86356		2.00467		2.43854		1.9667		2.24793		2.29516		2.4577		1.96427		2.2575		2.30631		2.25117		2.18686		2.22301		2.16028		2.24336		1.98258		2.18162		2.18336		2.25151		1.97958		2.1862
HBF–	0.611543	6 2A'		0.835926	0.404818		0.527932		0.394395		0.521509		0.672355		0.510469		0.692852		0.667738		0.665355		0.501469		0.686852		0.661315		0.570287		0.553979		0.503207		0.488475		0.634818		0.537355		0.635355		0.632932		0.628972		0.528355		0.628932
HBN–	3.88309	3 2Σ		5.83315	2.4829		3.71975		2.4099		3.68417		6.5027		4.18304		4.49265		4.62805		6.52127		4.15704		4.46407		4.60205		4.93368		4.28545		4.84009		4.19759		4.7607		3.92778		4.12078		4.14628		4.73628		3.89178		4.08536
	3.06731	4-5 2Π		3.11758	2.42729		2.74182		2.40202		2.73198		3.71462		2.83377		3.13154		3.25885		3.73662		2.82835		3.13096		3.26443		3.54125		3.32521		3.49032		3.27586		3.33378		2.87527		3.12131		3.13593		3.34136		2.86985		3.12031
HCC–	3.09731	3 2Σ		4.67258	2.71852		3.42078		2.67509		3.39778		3.63239		3.16058		3.14173		3.34958		3.60597		3.12916		3.10273		3.31558		3.5056		3.35229		3.24201		3.0917		3.28105		3.08978		3.13316		3.1772		3.24762		3.05536		3.09674
	3.47309	4-5 2Π		3.417	3.25829		3.43782		3.25302		3.4374		3.5595		3.29524		3.31931		3.47858		3.56508		3.29182		3.31473		3.47958		3.80079		3.71906		3.63748		3.55617		3.56336		3.3322		3.48005		3.50909		3.56793		3.3292		3.48162
HCO–	0.633087	6 2A'		1.22619	0.159133		0.628093		0.134287		0.615093		0.996087		0.551778		0.723583		0.797241		0.989664		0.537355		0.710738		0.784818		0.785253		0.691945		0.697556		0.60367		0.739167		0.531704		0.648281		0.658013		0.725744		0.515281		0.631281
HNB–	4.18309	3-4 2Π		4.89658	3.57775		4.08329		3.54048		4.06486		4.92323		4.19423		4.45173		4.51816		4.92481		4.17923		4.43973		4.50774		4.29335		4.40531		4.48963		4.33132		4.42182		4.11293		4.26193		4.2674		4.40682		4.09293		4.24293
	1.87154	5 2Σ		2.42115	1.82697		2.01324		1.81255		2.00482		2.00066		1.89558		1.98031		1.98466		1.98723		1.88158		1.96589		1.96966		1.09665		1.18658		1.84566		1.82809		1.9527		1.89916		1.94839		1.94754		1.93927		1.88516		1.93397
HNF–	4.25886	6 2A'		5.40473	3.30006		4.18617		3.25521		4.16517		5.18755		4.28674		4.58943		4.63613		5.18213		4.26674		4.57101		4.6187		4.50522		4.2996		4.49802		4.29298		4.49778		4.12944		4.29217		4.29421		4.47794		4.10401		4.26674
	1.25463	7 2A''		2.49331	0.576522		1.23633		0.534099		1.2149		1.87674		1.25682		1.40036		1.5139		1.86232		1.2334		1.37436		1.49148		1.56011		1.39807		1.44264		1.2816		1.4524		1.18321		1.29236		1.30982		1.42856		1.15578		1.26394
HOO–	2.13463	6 2A'		3.96815	0.960448		2.07583		0.898448		2.04741		3.55744		2.34547		2.62216		2.6879		3.54901		2.31947		2.59616		2.66348		2.63403		2.31484		2.6251		2.30202		2.56313		2.08863		2.24452		2.24756		2.53471		2.05578		2.21009
	1.5704	7 2A''		3.27531	0.233756		1.36014		0.170334		1.33229		2.94001		1.68447		1.99516		2.03505		2.93359		1.66005		1.97016		2.01063		1.92876		1.60815		1.95737		1.63575		1.88129		1.39736		1.55967		1.55786		1.85286		1.38833		1.52525
HPAl–	2.43309	4 2A''		2.46815	2.30082		2.39809		2.29398		2.39567		2.53174		2.33866		2.47643		2.50047		2.53431		2.33582		2.47543		2.50262		2.4596		2.43844		2.3879		2.36832		2.45824		2.34782		2.44351		2.44509		2.4584		2.3434		2.44209
	2.20731	5 2A'		2.24473	2.07663		2.27648		2.07178		2.27705		2.26258		2.10909		2.26112		2.24901		2.26316		2.10409		2.26327		2.24958		2.18767		2.17309		2.10001		2.08544		2.20662		2.11651		2.20747		2.20505		2.2052		2.11151		2.20447
HPCl–	4.67463	6 2A'		5.18031	4.4436		4.86044		4.42575		4.85402		4.86401		4.61686		4.79413		4.80801		4.85517		4.60344		4.7817		4.79717		4.65252		4.62537		4.56698		4.53982		4.68605		4.5859		4.67032		4.6709		4.67163		4.57048		4.6549
	1.68463	7 2A''		1.83627	1.50271		1.70682		1.49386		1.7034		1.76244		1.57486		1.72397		1.73386		1.75901		1.56844		1.72013		1.72944		1.66321		1.64148		1.57098		1.54925		1.68732		1.58401		1.67859		1.67917		1.6819		1.57817		1.67317
HSiS–	4.04463	5 2A"		4.21	3.81921		3.99933		3.80594		3.99348		4.23213		3.94097		4.12624		4.15844		4.23328		3.93355		4.12282		4.15659		4.05756		4.02641		4.01598		3.98482		4.06963		3.93417		4.04248		4.04363		4.06478		3.92632		4.03505
	2.39886	6 2A'		2.57331	2.15586		2.46698		2.14402		2.46513		2.51024		2.26497		2.45693		2.46482		2.5084		2.25755		2.45251		2.4604		2.3379		2.31333		2.26152		2.23536		2.37386		2.25986		2.3617		2.36128		2.36801		2.25144		2.35428
HSiSi–	2.42731	4 2A"		2.079	2.27405		2.3199		2.28378		2.32905		2.31012		2.26063		2.23608		2.30301		2.3227		2.26778		2.24408		2.31458		2.44498		2.41825		2.32186		2.2967		2.35747		2.18678		2.33516		2.34805		2.37105		2.18578		2.34831
	2.38731	5 2A'		2.00458	2.29505		2.3009		2.30978		2.31205		2.28397		2.29613		2.22193		2.28543		2.29954		2.30944		2.2345		2.30101		2.44598		2.42325		2.32686		2.3057		2.35589		1.98446		2.33658		2.34789		2.37505		1.92172		2.35474
HSS–	2.86617	6 2A'		3.29758	2.50298		2.88694		2.48056		2.87752		3.14267		2.76317		2.97963		3.0154		3.13782		2.75074		2.96978		3.00656		2.86591		2.8106		2.80048		2.74675		2.89129		2.72967		2.84456		2.84829		2.87944		2.71525		2.83171
	2.12617	7 2A''		2.43242	1.75241		2.11794		1.73356		2.11052		2.32852		1.97317		2.19021		2.22282		2.32625		1.96332		2.18078		2.21598		2.08033		2.0326		2.01348		1.96575		2.10929		1.95052		2.06956		2.07171		2.09944		1.93867		2.05713
NH2–	0.733087	4 2B1		1.35593	-0.183021		0.230898		-0.226444		0.208053		1.78394		0.741778		1.07724		1.12194		1.7961		0.729355		1.06924		1.11552		1.19242		0.933877		1.20695		0.946408		1.13025		0.672938		0.87071		0.87175		1.12341		0.654938		0.856864
OCl–	2.53772	6-7 2Π		3.87	1.74264		2.60202		1.6938		2.58003		3.6866		2.72944		3.02478		3.0829		3.68275		2.70901		3.00536		3.06506		2.96919		2.74515		2.95014		2.72825		2.93994		2.55629		2.71806		2.72094		2.9181		2.52886		2.69064
OF–	2.6704	6-7 2Π		4.687	1.71033		2.81314		1.65591		2.78929		3.77232		2.8624		3.03051		3.14352		3.7549		2.83497		3.00109		3.11609		3.14472		2.89326		3.05179		2.8029		3.02586		2.66067		2.7754		2.79144		2.99544		2.62725		2.74156
OH–	1.81886	3-4 2π		2.97462	0.161482		1.0686		0.0976361		1.03617		4.70451		2.25719		2.92936		2.78767		4.74955		2.24362		2.92578		2.78009		2.78512		2.19546		3.06173		2.45207		2.91119		2.00356		2.31268		2.26572		2.90992		1.98413		2.29625
PH2–	1.25309	4 2B1		1.23873	1.09105		1.13917		1.08721		1.13674		1.29166		1.12609		1.28062		1.27793		1.29482		1.12424		1.2822		1.28009		1.2229		1.20817		1.14752		1.13278		1.25428		1.14166		1.25155		1.24955		1.25544		1.14082		1.25055
SCl–	2.77194	6-7 2Π		3.21169	2.45541		2.84194		2.43556		2.8351		2.98286		2.66978		2.85556		2.89102		2.97602		2.65636		2.84313		2.88117		2.77033		2.7246		2.68121		2.63706		2.7896		2.6494		2.75386		2.7586		2.77775		2.63556		2.7416
SF–	2.5504	6-7 2Π		2.97542	2.28783		2.61637		2.27198		2.60894		2.75198		2.48263		2.66225		2.68713		2.74671		2.47121		2.6524		2.67929		2.59618		2.55803		2.50706		2.4689		2.62644		2.48867		2.59829		2.60144		2.6166		2.47782		2.58744
SH–	2.33463	3-4 2Π		2.58558	2.01764		2.24533		2.00279		2.2379		2.57994		2.23055		2.4669		2.48794		2.58009		2.22313		2.46248		2.48509		2.36376		2.31687		2.30375		2.25844		2.40256		2.23148		2.36582		2.36698		2.39671		2.22363		2.3584
SiH3–	1.86154	4 2A'		1.83758	1.74755		1.8404		1.74513		1.84097		1.86339		1.75989		1.93535		1.87435		1.86339		1.75847		1.93935		1.87535		1.75932		1.75774		1.6954		1.69324		1.83301		1.76531		1.8517		1.84254		1.83201		1.76389		1.8517
SiN–	3.05309	3 2Σ		2.90658	2.18652		2.47036		2.14482		2.45052		4.44777		2.70769		3.10003		3.28027		4.52735		2.69969		3.10688		3.29685		4.02698		3.51375		4.04532		3.52982		3.61605		2.78377		3.1447		3.15862		3.65062		2.77877		3.15627
	3.24731	4-5 2Π		4.21446	2.1524		3.0124		2.08356		2.98198		5.84897		3.29346		3.48838		3.77605		5.9187		3.27189		3.46223		3.75962		4.62976		3.83421		4.46109		3.68544		4.27013		3.28616		3.50847		3.56397		4.2717		3.26374		3.48862
SiP–	3.12886	3 2Σ		3.57415	2.98856		3.34898		2.96771		3.34256		3.42951		3.12382		3.18231		3.30897		3.42309		3.1104		3.16689		3.29913		3.4159		3.33717		3.24936		3.17005		3.29155		3.13297		3.21782		3.2417		3.2817		3.12013		3.2044
	3.09309	4-5 2Π		2.63642	2.80267		2.82636		2.8104		2.83409		2.95001		2.76101		2.82897		2.91505		2.96716		2.76674		2.83797		2.9302		3.04044		3.00529		2.96374		2.92801		2.94493		2.6947		2.9082		2.92051		2.96009		2.69212		2.92078
	Statistics for signed deviations from CCST(T) All 55 VEDEs.			KT	D2	os-D2	nD-D2	os-nD-D2	D3	OVGF-A	OVGF-B	OVGF-C	nD-D3	nD-OVGF-A	nD-OVGF-B	nD-OVGF-C	P3	P3+	Q3	Q3+	L3	L3+A	L3+B	L3+C	nD-L3	nD-L3+A	nD-L3+B	nD-L3+C	DR	RP3	RQ3	RL3	nD-RL3	ND2	2ph-TDA	3+	NR2	BD-T1	ADC(3)	NRP3	NRQ3	NRL3
				0.537096	-0.476537	-0.0588202	-0.5014	-0.0696884	0.623665	-0.00894734	0.1892	0.230263	0.563941	-0.0293697	0.158082	0.207287	0.235177	0.0941181	0.199847	0.0509815	0.212653	-0.0702084	0.0713713	0.0760312	0.205682	-0.0847872	0.0604324	0.0653972	0.198845	-0.0057409	-0.0815914	-0.0312746	-0.045135	-0.422599	-0.521127	0.207198	-0.0563629	0.0428076	0.152536	-0.0547363	-0.103616	-0.0436821
				0.628497	0.466069	0.251369	0.486606	0.256377	0.910019	0.195888	0.34664	0.291359	0.808317	0.192229	0.310964	0.270489	0.38657	0.211828	0.431343	0.24242	0.346781	0.148956	0.169362	0.157943	0.339824	0.135196	0.158225	0.144071	0.221137	0.175626	0.158733	0.0871675	0.0827628	0.418207	0.243833	0.322508	0.136198	0.0886795	0.238721	0.142138	0.14569	0.0846739
	Statistics for absolute deviations from CCST(T) All 55 VEDEs.			KT	D2	os-D2	nD-D2	os-nD-D2	D3	OVGF-A	OVGF-B	OVGF-C	nD-D3	nD-OVGF-A	nD-OVGF-B	nD-OVGF-C	P3	P3+	Q3	Q3+	L3	L3+A	L3+B	L3+C	nD-L3	nD-L3+A	nD-L3+B	nD-L3+C	DR	RP3	RQ3	RL3	nD-RL3	ND2	2ph-TDA	3+	NR2	BD-T1	ADC(3)	NRP3	NRQ3	NRL3
				0.612821	0.48154	0.175659	0.505863	0.180152	0.642193	0.135649	0.235355	0.248594	0.580646	0.13481	0.211852	0.223811	0.287575	0.159479	0.279683	0.158433	0.22759	0.125162	0.09799	0.100729	0.219697	0.123959	0.0863109	0.0891663	0.258347	0.129161	0.159645	0.0762915	0.0808597	0.508422	0.521127	0.230368	0.122784	0.0658264	0.201152	0.125713	0.160662	0.0771072
				2.0166	2.04295	0.852571	2.1038	0.881994	4.01838	0.822021	1.65438	1.36311	3.6221	0.810444	1.65538	1.35754	1.57667	0.781127	1.69566	0.965309	1.45042	0.463543	0.747651	0.669154	1.457	0.465596	0.734806	0.652731	0.711277	0.764175	0.417154	0.253383	0.22696	2.07664	1.12823	1.40664	0.514278	0.345491	0.823028	0.519257	0.382	0.250228
[truncated: 109 more columns]

## Sheet: Quartic_CBS-a34-VEDEs_Extrapola
				aTZ	aQZ	CBS	aTZ	aQZ	CBS	aTZ	aQZ	CBS	aTZ	aQZ	CBS	aTZ	aQZ	CBS	aTZ	aQZ	CBS	aTZ	aQZ	CBS	aTZ	aQZ	CBS	aTZ	aQZ	CBS	aTZ	aQZ	CBS	aTZ	aQZ	CBS	aTZ	aQZ	CBS	aTZ	aQZ	CBS	aTZ	aQZ	CBS	aTZ	aQZ	CBS	aTZ
Anions	CCSD(T) VEDE	Final State		KT			D2			os-D2			nD-D2			os-nD-D2			D3			OVGF-A			OVGF-B			OVGF-C			nD-D3			nD-OVGF-A			nD-OVGF-B			nD-OVGF-C			P3			P3+			Q3
AlH4–		2-4 2T2		5.395	5.4	5.40289	4.966	5.011	5.03697	5.175	5.219	5.2444	4.959	5.005	5.03155	5.172	5.216	5.2414	4.957	4.976	4.98697	4.962	4.995	5.01405	5.082	5.095	5.1025	4.948	4.938	4.93223	4.948	4.967	4.97797	4.954	4.988	5.00762	5.074	5.088	5.09608	4.935	4.925	4.91923	4.779	4.826	4.85313	4.79	4.838	4.8657	4.753
AlO–		3-4 2Π		4.669	4.674	4.67689	1.733	1.835	1.89387	2.643	2.736	2.78968	1.644	1.748	1.80803	2.598	2.693	2.74783	7.442	7.458	7.46723	4.01	3.965	3.93903	4.909	4.866	4.84118	4.531	4.537	4.54046	X	X	#VALUE!	X	X	#VALUE!	X	X	#VALUE!	X	X	#VALUE!	4.485	4.613	4.68688	3.823	3.937	4.0028	5.042
		5 2Σ		2.752	2.749	2.74727	2.306	2.357	2.38644	2.551	2.596	2.62197	2.294	2.346	2.37601	2.546	2.593	2.62013	3.133	3.139	3.14246	2.606	2.613	2.61704	2.973	2.975	2.97615	2.959	2.97	2.97635	3.147	3.154	3.15804	2.603	2.61	2.61404	2.982	2.984	2.98515	2.967	2.978	2.98435	2.759	2.81	2.83944	2.686	2.735	2.76328	2.779
AlS–		3-4 2Π		3.803	3.805	3.80615	2.963	3.055	3.1081	3.255	3.341	3.39064	2.939	3.031	3.0841	3.242	3.33	3.38079	3.741	3.792	3.82144	3.329	3.368	3.39051	3.575	3.62	3.64597	3.581	3.637	3.66932	3.739	3.791	3.82101	3.318	3.357	3.37951	3.567	3.613	3.63955	3.573	3.631	3.66448	3.341	3.443	3.50187	3.288	3.388	3.44572	3.365
		5 2Σ		2.796	2.798	2.79915	2.538	2.597	2.63105	2.741	2.796	2.82774	2.53	2.591	2.62621	2.739	2.796	2.8289	2.802	2.83	2.84616	2.611	2.648	2.66936	2.818	2.841	2.85427	2.791	2.818	2.83358	2.802	2.832	2.84931	2.606	2.644	2.66593	2.819	2.843	2.85685	2.791	2.819	2.83516	2.64	2.704	2.74094	2.626	2.69	2.72694	2.587
BH4–		2-4 2T2		5.187	5.19	5.19173	4.498	4.548	4.57686	4.837	4.885	4.9127	4.486	4.537	4.56644	4.832	4.88	4.9077	4.723	4.732	4.73719	4.608	4.634	4.64901	4.747	4.751	4.75331	4.722	4.729	4.73304	4.713	4.723	4.72877	4.598	4.624	4.63901	4.737	4.741	4.74331	4.712	4.719	4.72304	4.531	4.584	4.61459	4.528	4.58	4.61001	4.472
BO–		3-4 2Π		6.857	6.855	6.85385	4.711	4.803	4.8561	5.425	5.509	5.55748	4.655	4.749	4.80325	5.398	5.483	5.53206	7.094	7.115	7.12712	6.031	6.038	6.04204	6.44	6.445	6.44789	6.361	6.394	6.41305	7.099	7.122	7.13527	6.016	6.023	6.02704	6.431	6.435	6.43731	6.349	6.383	6.40262	6.07	6.181	6.24507	5.841	5.946	6.0066	6.278
		5 2Σ		2.972	2.974	2.97515	2.488	2.536	2.5637	2.632	2.677	2.70297	2.477	2.526	2.55428	2.625	2.671	2.69755	2.577	2.598	2.61012	2.524	2.559	2.5792	2.601	2.613	2.61993	2.575	2.596	2.60812	2.564	2.587	2.60027	2.513	2.549	2.56978	2.588	2.601	2.6085	2.563	2.584	2.59612	2.57	2.625	2.65674	2.561	2.615	2.64617	2.456
BS–		3-4 2Π		4.634	4.632	4.63085	4.21	4.297	4.34721	4.376	4.456	4.50217	4.197	4.286	4.33737	4.37	4.452	4.49933	4.558	4.605	4.63213	4.339	4.39	4.41944	4.492	4.535	4.55982	4.508	4.56	4.59001	4.555	4.604	4.63228	4.332	4.383	4.41244	4.487	4.532	4.55797	4.504	4.558	4.58917	4.367	4.462	4.51683	4.349	4.443	4.49725	4.363
		5 2Σ		3.086	3.084	3.08285	2.301	2.356	2.38774	2.625	2.677	2.70701	2.281	2.337	2.36932	2.615	2.668	2.69859	2.526	2.553	2.56858	2.398	2.435	2.45636	2.471	2.488	2.49781	2.496	2.524	2.54016	2.507	2.535	2.55116	2.379	2.417	2.43893	2.448	2.466	2.47639	2.475	2.505	2.52231	2.484	2.545	2.58021	2.456	2.516	2.55063	2.326
CH3–		4 2A1		0.713	0.728	0.736657	-0.077	-0.03	-0.00287332	0.066	0.104	0.125932	-0.1	-0.051	-0.022719	0.051	0.089	0.110932	0.611	0.66	0.688281	0.238	0.271	0.290046	0.413	0.438	0.452429	0.46	0.5	0.523087	0.607	0.657	0.685858	0.227	0.259	0.277469	0.403	0.429	0.444006	0.451	0.493	0.517241	0.417	0.521	0.581025	0.347	0.441	0.495253	0.367
Cl–		2-4 2Tu		4.091	4.09	4.08942	3.079	3.188	3.25091	3.416	3.517	3.57529	3.057	3.167	3.23049	3.405	3.508	3.56745	3.879	3.97	4.02252	3.505	3.566	3.60121	3.734	3.82	3.86964	3.74	3.833	3.88668	3.874	3.967	4.02068	3.494	3.556	3.59178	3.725	3.813	3.86379	3.732	3.827	3.88183	3.501	3.625	3.69657	3.449	3.569	3.63826	3.51
CN–		3 2Σ		5.257	5.259	5.26015	3.492	3.564	3.60556	4.11	4.177	4.21567	3.457	3.531	3.57371	4.093	4.161	4.20025	4.221	4.251	4.26831	3.836	3.914	3.95902	3.862	3.88	3.89039	4.021	4.059	4.08093	4.198	4.228	4.24531	3.851	3.888	3.90936	3.83	3.849	3.85997	3.994	4.032	4.05393	4.142	4.226	4.27448	4.031	4.111	4.15717	3.941
		4-5 2Π		5.226	5.225	5.22442	4.74	4.823	4.8709	4.992	5.067	5.11029	4.724	4.809	4.85806	4.986	5.063	5.10744	5.288	5.308	5.31954	4.919	4.957	4.97893	5.023	5.032	5.03719	5.139	5.172	5.19105	5.29	5.31	5.32154	4.911	4.95	4.97251	5.016	5.026	5.03177	5.136	5.171	5.1912	5.364	5.46	5.51541	5.274	5.367	5.42068	5.296
CP–		3 2Σ		4.382	4.384	4.38515	2.516	2.582	2.62009	3.245	3.31	3.34752	2.466	2.533	2.57167	3.222	3.288	3.32609	3.473	3.508	3.5282	2.944	2.981	3.00236	2.811	2.828	2.83781	3.125	3.167	3.19124	3.446	3.482	3.50278	2.91	2.947	2.96836	2.766	2.784	2.79439	3.089	3.132	3.15682	3.47	3.554	3.60248	3.256	3.334	3.37902	3.137
		4-5 2Π		3.44	3.438	3.43685	3.627	3.696	3.73582	3.636	3.701	3.73852	3.636	3.708	3.74956	3.643	3.71	3.74867	3.594	3.621	3.63658	3.638	3.73	3.7831	3.469	3.487	3.49739	3.603	3.641	3.66293	3.601	3.629	3.64516	3.648	3.747	3.80414	3.47	3.489	3.49997	3.61	3.65	3.67309	3.899	3.979	4.02517	3.861	3.939	3.98402	3.779
F–		2-4 2Tu		4.924	4.925	4.92558	1.215	1.318	1.37745	2.418	2.513	2.56783	1.151	1.256	1.3166	2.387	2.483	2.53841	6.753	6.911	7.00219	4.244	4.243	4.24242	5.018	5.054	5.07478	4.681	4.746	4.78352	6.787	6.949	7.0425	4.234	4.232	4.23085	5.019	5.055	5.07578	4.677	4.741	4.77794	4.147	4.331	4.4372	3.562	3.716	3.80488	4.709
HAlCl–		6 2A'		1.852	1.855	1.85673	1.819	1.863	1.8884	1.937	1.978	2.00166	1.818	1.863	1.88897	1.939	1.981	2.00524	1.938	1.956	1.96639	1.826	1.861	1.8812	2.071	2.08	2.08519	1.975	1.982	1.98604	1.941	1.96	1.97097	1.826	1.861	1.8812	2.081	2.09	2.09519	1.98	1.988	1.99262	1.78	1.829	1.85728	1.783	1.832	1.86028	1.743
HAlP–		3 2Σ		4.278	4.279	4.27958	3.308	3.376	3.41525	3.734	3.801	3.83967	3.275	3.345	3.3854	3.719	3.788	3.82782	4.423	4.439	4.44823	3.761	3.777	3.78623	4.077	4.083	4.08646	4.098	4.123	4.13743	4.429	4.446	4.45581	3.747	3.764	3.77381	4.069	4.075	4.07846	4.091	4.117	4.13201	3.903	3.985	4.03233	3.79	3.866	3.90986	3.894
		4-5 2Π		2.063	2.064	2.06458	1.763	1.832	1.87182	1.904	1.969	2.00652	1.75	1.822	1.86356	1.899	1.966	2.00467	2.407	2.427	2.43854	1.932	1.954	1.9667	2.229	2.241	2.24793	2.251	2.279	2.29516	2.423	2.445	2.4577	1.928	1.951	1.96427	2.237	2.25	2.2575	2.259	2.289	2.30631	2.125	2.205	2.25117	2.067	2.143	2.18686	2.141
HBF–		6 2A'		0.817	0.829	0.835926	0.337	0.38	0.404818	0.468	0.506	0.527932	0.325	0.369	0.394395	0.46	0.499	0.521509	0.614	0.651	0.672355	0.46	0.492	0.510469	0.655	0.679	0.692852	0.622	0.651	0.667738	0.607	0.644	0.665355	0.451	0.483	0.501469	0.649	0.673	0.686852	0.614	0.644	0.661315	0.452	0.527	0.570287	0.442	0.513	0.553979	0.407
HBN–		3 2Σ		5.83	5.832	5.83315	2.352	2.435	2.4829	3.592	3.673	3.71975	2.279	2.362	2.4099	3.558	3.638	3.68417	6.468	6.49	6.5027	4.172	4.179	4.18304	4.51	4.499	4.49265	4.576	4.609	4.62805	6.485	6.508	6.52127	4.146	4.153	4.15704	4.483	4.471	4.46407	4.55	4.583	4.60205	4.746	4.865	4.93368	4.123	4.226	4.28545	4.736
		4-5 2Π		3.116	3.117	3.11758	2.309	2.384	2.42729	2.633	2.702	2.74182	2.279	2.357	2.40202	2.62	2.691	2.73198	3.702	3.71	3.71462	2.818	2.828	2.83377	3.141	3.135	3.13154	3.221	3.245	3.25885	3.724	3.732	3.73662	2.811	2.822	2.82835	3.142	3.135	3.13096	3.225	3.25	3.26443	3.393	3.487	3.54125	3.188	3.275	3.32521	3.402
HCC–		3 2Σ		4.671	4.672	4.67258	2.616	2.681	2.71852	3.323	3.385	3.42078	2.571	2.637	2.67509	3.3	3.362	3.39778	3.604	3.622	3.63239	3.118	3.145	3.16058	3.137	3.14	3.14173	3.307	3.334	3.34958	3.576	3.595	3.60597	3.085	3.113	3.12916	3.098	3.101	3.10273	3.273	3.3	3.31558	3.381	3.46	3.5056	3.234	3.309	3.35229	3.16
		4-5 2Π		3.417	3.417	3.417	3.14	3.215	3.25829	3.329	3.398	3.43782	3.13	3.208	3.25302	3.327	3.397	3.4374	3.539	3.552	3.5595	3.229	3.271	3.29524	3.313	3.317	3.31931	3.436	3.463	3.47858	3.543	3.557	3.56508	3.224	3.267	3.29182	3.31	3.313	3.31473	3.437	3.464	3.47958	3.662	3.75	3.80079	3.585	3.67	3.71906	3.546
HCO–		6 2A'		1.212	1.221	1.22619	0.044	0.117	0.159133	0.524	0.59	0.628093	0.016	0.091	0.134287	0.511	0.577	0.615093	0.933	0.973	0.996087	0.495	0.531	0.551778	0.681	0.708	0.723583	0.731	0.773	0.797241	0.925	0.966	0.989664	0.479	0.516	0.537355	0.665	0.694	0.710738	0.717	0.76	0.784818	0.637	0.731	0.785253	0.55	0.64	0.691945	0.584
HNB–		3-4 2Π		4.895	4.896	4.89658	3.45	3.531	3.57775	3.965	4.04	4.08329	3.408	3.492	3.54048	3.945	4.021	4.06486	4.898	4.914	4.92323	4.169	4.185	4.19423	4.447	4.45	4.45173	4.474	4.502	4.51816	4.898	4.915	4.92481	4.154	4.17	4.17923	4.435	4.438	4.43973	4.462	4.491	4.50774	4.746	4.459	4.29335	4.123	4.302	4.40531	4.395
		5 2Σ		2.418	2.42	2.42115	1.756	1.801	1.82697	1.947	1.989	2.01324	1.74	1.786	1.81255	1.937	1.98	2.00482	1.977	1.992	2.00066	1.853	1.88	1.89558	1.974	1.978	1.98031	1.961	1.976	1.98466	1.962	1.978	1.98723	1.839	1.866	1.88158	1.958	1.963	1.96589	1.946	1.961	1.96966	3.393	1.937	1.09665	3.188	1.919	1.18658	1.781
HNF–		6 2A'		5.4	5.403	5.40473	3.166	3.251	3.30006	4.06	4.14	4.18617	3.118	3.205	3.25521	4.039	4.119	4.16517	5.115	5.161	5.18755	4.241	4.27	4.28674	4.55	4.575	4.58943	4.562	4.609	4.63613	5.108	5.155	5.18213	4.221	4.25	4.26674	4.53	4.556	4.57101	4.543	4.591	4.6187	4.327	4.44	4.50522	4.134	4.239	4.2996	4.375
		7 2A''		2.487	2.491	2.49331	0.433	0.524	0.576522	1.107	1.189	1.23633	0.389	0.481	0.534099	1.084	1.167	1.2149	1.79	1.845	1.87674	1.189	1.232	1.25682	1.342	1.379	1.40036	1.424	1.481	1.5139	1.774	1.83	1.86232	1.164	1.208	1.2334	1.316	1.353	1.37436	1.4	1.458	1.49148	1.374	1.492	1.56011	1.223	1.334	1.39807	1.307
HOO–		6 2A'		3.965	3.967	3.96815	0.798	0.901	0.960448	1.926	2.021	2.07583	0.736	0.839	0.898448	1.896	1.992	2.04741	3.477	3.528	3.55744	2.295	2.327	2.34547	2.578	2.606	2.62216	2.598	2.655	2.6879	3.467	3.519	3.54901	2.269	2.301	2.31947	2.552	2.58	2.59616	2.572	2.63	2.66348	2.429	2.559	2.63403	2.124	2.245	2.31484	2.48
		7 2A''		3.269	3.273	3.27531	0.065	0.172	0.233756	1.204	1.303	1.36014	0	0.108	0.170334	1.173	1.274	1.33229	2.858	2.91	2.94001	1.634	1.666	1.68447	1.951	1.979	1.99516	1.942	2.001	2.03505	2.85	2.903	2.93359	1.608	1.641	1.66005	1.926	1.954	1.97016	1.916	1.976	2.01063	1.719	1.852	1.92876	1.411	1.536	1.60815	1.817
HPAl–		4 2A''		2.465	2.467	2.46815	2.192	2.261	2.30082	2.294	2.36	2.39809	2.182	2.253	2.29398	2.29	2.357	2.39567	2.486	2.515	2.53174	2.274	2.315	2.33866	2.437	2.462	2.47643	2.45	2.482	2.50047	2.487	2.517	2.53431	2.268	2.311	2.33582	2.436	2.461	2.47543	2.449	2.483	2.50262	2.335	2.414	2.4596	2.317	2.394	2.43844	2.298
		5 2A'		2.24	2.243	2.24473	1.982	2.042	2.07663	2.185	2.243	2.27648	1.974	2.036	2.07178	2.184	2.243	2.27705	2.22	2.247	2.26258	2.046	2.086	2.10909	2.228	2.249	2.26112	2.208	2.234	2.24901	2.219	2.247	2.26316	2.041	2.081	2.10409	2.227	2.25	2.26327	2.207	2.234	2.24958	2.082	2.149	2.18767	2.069	2.135	2.17309	2.018
HPCl–		6 2A'		5.174	5.178	5.18031	4.319	4.398	4.4436	4.739	4.816	4.86044	4.298	4.379	4.42575	4.731	4.809	4.85402	4.782	4.834	4.86401	4.538	4.588	4.61686	4.72	4.767	4.79413	4.726	4.778	4.80801	4.77	4.824	4.85517	4.523	4.574	4.60344	4.706	4.754	4.7817	4.712	4.766	4.79717	4.509	4.6	4.65252	4.485	4.574	4.62537	4.455
		7 2A''		1.841	1.838	1.83627	1.386	1.46	1.50271	1.598	1.667	1.70682	1.374	1.45	1.49386	1.593	1.663	1.7034	1.682	1.733	1.76244	1.496	1.546	1.57486	1.653	1.698	1.72397	1.655	1.705	1.73386	1.677	1.729	1.75901	1.488	1.539	1.56844	1.646	1.693	1.72013	1.649	1.7	1.72944	1.526	1.613	1.66321	1.509	1.593	1.64148	1.459
HSiS–		5 2A"		4.21	4.21	4.21	3.682	3.769	3.81921	3.87	3.952	3.99933	3.664	3.754	3.80594	3.861	3.945	3.99348	4.158	4.205	4.23213	3.87	3.915	3.94097	4.06	4.102	4.12624	4.078	4.129	4.15844	4.156	4.205	4.23328	3.861	3.907	3.93355	4.055	4.098	4.12282	4.073	4.126	4.15659	3.903	4.001	4.05756	3.875	3.971	4.02641	3.904
		6 2A'		2.567	2.571	2.57331	2.036	2.112	2.15586	2.355	2.426	2.46698	2.021	2.099	2.14402	2.35	2.423	2.46513	2.444	2.486	2.51024	2.194	2.239	2.26497	2.397	2.435	2.45693	2.397	2.44	2.46482	2.439	2.483	2.5084	2.185	2.231	2.25755	2.391	2.43	2.45251	2.391	2.435	2.4604	2.207	2.29	2.3379	2.184	2.266	2.31333	2.159
HSiSi–		4 2A"		2.079	2.079	2.079	2.181	2.24	2.27405	2.23	2.287	2.3199	2.186	2.248	2.28378	2.236	2.295	2.32905	2.277	2.298	2.31012	2.166	2.226	2.26063	2.214	2.228	2.23608	2.262	2.288	2.30301	2.288	2.31	2.3227	2.17	2.232	2.26778	2.222	2.236	2.24408	2.272	2.299	2.31458	2.333	2.404	2.44498	2.311	2.379	2.41825	2.243
		5 2A'		2.003	2.004	2.00458	2.202	2.261	2.29505	2.211	2.268	2.3009	2.212	2.274	2.30978	2.219	2.278	2.31205	2.254	2.273	2.28397	2.181	2.254	2.29613	2.203	2.215	2.22193	2.246	2.271	2.28543	2.268	2.288	2.29954	2.188	2.265	2.30944	2.214	2.227	2.2345	2.26	2.286	2.30101	2.334	2.405	2.44598	2.316	2.384	2.42325	2.248
HSS–		6 2A'		3.296	3.297	3.29758	2.35	2.447	2.50298	2.745	2.835	2.88694	2.326	2.424	2.48056	2.734	2.825	2.87752	3.037	3.104	3.14267	2.678	2.732	2.76317	2.885	2.945	2.97963	2.905	2.975	3.0154	3.029	3.098	3.13782	2.664	2.719	2.75074	2.872	2.934	2.96978	2.893	2.965	3.00656	2.694	2.803	2.86591	2.645	2.75	2.8106	2.668
		7 2A''		2.434	2.433	2.43242	1.601	1.697	1.75241	1.976	2.066	2.11794	1.579	1.677	1.73356	1.967	2.058	2.11052	2.226	2.291	2.32852	1.888	1.942	1.97317	2.094	2.155	2.19021	2.114	2.183	2.22282	2.219	2.287	2.32625	1.875	1.931	1.96332	2.083	2.145	2.18078	2.104	2.175	2.21598	1.91	2.018	2.08033	1.867	1.972	2.0326	1.881
NH2–		4 2B1		1.337	1.349	1.35593	-0.295	-0.224	-0.183021	0.141	0.198	0.230898	-0.34	-0.268	-0.226444	0.115	0.174	0.208053	1.642	1.732	1.78394	0.685	0.721	0.741778	1.011	1.053	1.07724	1.021	1.085	1.12194	1.651	1.743	1.7961	0.671	0.708	0.729355	1.003	1.045	1.06924	1.013	1.078	1.11552	0.959	1.107	1.19242	0.732	0.86	0.933877	1.024
OCl–		6-7 2Π		3.87	3.87	3.87	1.566	1.678	1.74264	2.438	2.542	2.60202	1.514	1.628	1.6938	2.416	2.52	2.58003	3.562	3.641	3.6866	2.649	2.7	2.72944	2.927	2.989	3.02478	2.952	3.035	3.0829	3.555	3.636	3.68275	2.627	2.679	2.70901	2.906	2.969	3.00536	2.931	3.016	3.06506	2.761	2.893	2.96919	2.548	2.673	2.74515	2.794
OF–		6-7 2Π		4.687	4.687	4.687	1.54	1.648	1.71033	2.657	2.756	2.81314	1.484	1.593	1.65591	2.63	2.731	2.78929	3.684	3.74	3.77232	2.793	2.837	2.8624	2.969	3.008	3.03051	3.041	3.106	3.14352	3.665	3.722	3.7549	2.764	2.809	2.83497	2.938	2.978	3.00109	3.012	3.078	3.11609	2.946	3.072	3.14472	2.704	2.824	2.89326	2.913
OH–		3-4 2π		2.962	2.97	2.97462	0.029	0.113	0.161482	0.944	1.023	1.0686	-0.038	0.048	0.0976361	0.91	0.99	1.03617	4.408	4.596	4.70451	2.243	2.252	2.25719	2.871	2.908	2.92936	2.682	2.749	2.78767	4.442	4.637	4.74955	2.231	2.239	2.24362	2.869	2.905	2.92578	2.676	2.742	2.78009	2.476	2.672	2.78512	1.951	2.106	2.19546	2.822
PH2–		4 2B1		1.234	1.237	1.23873	0.998	1.057	1.09105	1.054	1.108	1.13917	0.991	1.052	1.08721	1.05	1.105	1.13674	1.227	1.268	1.29166	1.063	1.103	1.12609	1.227	1.261	1.28062	1.218	1.256	1.27793	1.227	1.27	1.29482	1.058	1.1	1.12424	1.227	1.262	1.2822	1.217	1.257	1.28009	1.092	1.175	1.2229	1.082	1.162	1.20817	1.045
SCl–		6-7 2Π		3.218	3.214	3.21169	2.304	2.4	2.45541	2.7	2.79	2.84194	2.281	2.379	2.43556	2.69	2.782	2.8351	2.863	2.939	2.98286	2.572	2.634	2.66978	2.742	2.814	2.85556	2.768	2.846	2.89102	2.853	2.931	2.97602	2.557	2.62	2.65636	2.728	2.801	2.84313	2.755	2.835	2.88117	2.6	2.708	2.77033	2.559	2.664	2.7246	2.544
SF–		6-7 2Π		2.977	2.976	2.97542	2.138	2.233	2.28783	2.476	2.565	2.61637	2.119	2.216	2.27198	2.467	2.557	2.60894	2.64	2.711	2.75198	2.388	2.448	2.48263	2.555	2.623	2.66225	2.572	2.645	2.68713	2.63	2.704	2.74671	2.375	2.436	2.47121	2.542	2.612	2.6524	2.561	2.636	2.67929	2.429	2.535	2.59618	2.394	2.498	2.55803	2.373
SH–		3-4 2Π		2.584	2.585	2.58558	1.882	1.968	2.01764	2.116	2.198	2.24533	1.864	1.952	2.00279	2.107	2.19	2.2379	2.479	2.543	2.57994	2.158	2.204	2.23055	2.377	2.434	2.4669	2.387	2.451	2.48794	2.476	2.542	2.58009	2.149	2.196	2.22313	2.371	2.429	2.46248	2.381	2.447	2.48509	2.195	2.302	2.36376	2.156	2.258	2.31687	2.176
SiH3–		4 2A'		1.836	1.837	1.83758	1.675	1.721	1.74755	1.771	1.815	1.8404	1.671	1.718	1.74513	1.77	1.815	1.84097	1.835	1.853	1.86339	1.711	1.742	1.75989	1.918	1.929	1.93535	1.857	1.868	1.87435	1.835	1.853	1.86339	1.708	1.74	1.75847	1.922	1.933	1.93935	1.858	1.869	1.87535	1.671	1.727	1.75932	1.671	1.726	1.75774	1.626
SiN–		3 2Σ		2.905	2.906	2.90658	2.084	2.149	2.18652	2.371	2.434	2.47036	2.036	2.105	2.14482	2.348	2.413	2.45052	4.432	4.442	4.44777	2.714	2.71	2.70769	3.13	3.111	3.10003	3.244	3.267	3.28027	4.51	4.521	4.52735	2.706	2.702	2.69969	3.14	3.119	3.10688	3.259	3.283	3.29685	3.874	3.971	4.02698	3.386	3.467	3.51375	3.957
		4-5 2Π		4.205	4.211	4.21446	2.042	2.112	2.1524	2.902	2.972	3.0124	1.97	2.042	2.08356	2.87	2.941	2.98198	5.778	5.823	5.84897	3.284	3.29	3.29346	3.501	3.493	3.48838	3.724	3.757	3.77605	5.843	5.891	5.9187	3.264	3.269	3.27189	3.478	3.468	3.46223	3.706	3.74	3.75962	4.461	4.568	4.62976	3.697	3.784	3.83421	4.357
SiP–		3 2Σ		3.571	3.573	3.57415	2.875	2.947	2.98856	3.237	3.308	3.34898	2.851	2.925	2.96771	3.229	3.301	3.34256	3.368	3.407	3.42951	3.056	3.099	3.12382	3.135	3.165	3.18231	3.238	3.283	3.30897	3.36	3.4	3.42309	3.041	3.085	3.1104	3.118	3.149	3.16689	3.225	3.272	3.29913	3.285	3.368	3.4159	3.211	3.291	3.33717	3.15
		4-5 2Π		2.638	2.637	2.63642	2.697	2.764	2.80267	2.727	2.79	2.82636	2.7	2.77	2.8104	2.73	2.796	2.83409	2.909	2.935	2.95001	2.679	2.731	2.76101	2.799	2.818	2.82897	2.863	2.896	2.91505	2.923	2.951	2.96716	2.68	2.735	2.76674	2.808	2.827	2.83797	2.875	2.91	2.9302	2.919	2.996	3.04044	2.887	2.962	3.00529	2.877
[truncated: 74 more columns]

## Sheet: Cubic_CBS-a23-VEDEs
							CCSD(T)/ CBS-a34 Versus EPT/ CBS-a34
Anions	CCSD(T) VEDE	Final State		KT	D2	PS(D2)	os-D2	PS(os-D2)	nD-D2	PS(nD-D2)	os-nD-D2	PS(os-nD-D2)	D3	PS(D3)	OVGF-A	PS(OVGF-A)	OVGF-B	PS(OVGF-B)	OVGF-C	PS(OVGF-C)	nD-D3	PS(nD-D3)	nD-OVGF-A	PS(nD-OVGF-A)	nD-OVGF-B	PS(nD-OVGF-B)	nD-OVGF-C	PS(nD-OVGF-C)	P3	PS(P3)	P3+	PS(P3+)	Q3	PS(Q3)	Q3+	PS(Q3+)	L3	PS(L3)	L3+A	PS(L3+A)	L3+B	PS(L3+B)	L3+C	PS(L3+C)	nD-L3	PS(nD-L3)	nD-L3+A	PS(nD-L3+A)	nD-L3+B
AlH4–	4.92211	2-4 2T2		5.40889	5.03042		5.23689		5.02384		5.23474		5.00205		5.01547		5.12663		4.96568		4.99347		5.00789		5.11905		4.95268		4.84553		4.85695		4.81111		4.82253		4.95753		4.983		4.99368		4.99342		4.94937		4.97584		4.98511
AlO–	3.40789	3-4 2Π		4.67489	1.82268		2.71626		1.73495		2.67168		X		X		X		X		X		X		X		X		4.59826		3.92447		5.08326		4.36353		4.85189		3.80289		4.15858		4.07263		4.85774		3.78274		4.14258
	2.68368	5 2Σ		2.74863	2.35316		2.59268		2.34242		2.58811		3.15237		2.61358		2.98816		2.98047		3.16721		2.61058		2.998		2.98932		2.81121		2.73653		2.81689		2.74121		2.90805		2.62884		2.84295		2.83621		2.91332		2.62668		2.84579
AlS–	3.36947	3-4 2Π		3.79921	3.02826		3.30679		3.00637		3.29421		3.74816		3.33321		3.58216		3.60205		3.74658		3.32263		3.57416		3.59447		3.40205		3.34863		3.39489		3.34189		3.46842		3.29395		3.41884		3.41821		3.45584		3.27837		3.40668
	2.71947	5 2Σ		2.79263	2.58347		2.781		2.57632		2.77984		2.82474		2.63458		2.83947		2.81247		2.82558		2.63		2.84174		2.81374		2.68884		2.67358		2.62279		2.60895		2.75447		2.64511		2.75963		2.75421		2.75232		2.64195		2.75747
BH4–	4.68368	2-4 2T2		5.19668	4.56158		4.89511		4.55		4.89095		4.74658		4.64168		4.76721		4.74263		4.737		4.63211		4.75721		4.73305		4.59795		4.59453		4.52		4.517		4.64574		4.61253		4.65705		4.64979		4.63374		4.60237		4.64547
BO–	5.70947	3-4 2Π		6.85279	4.78595		5.48395		4.73121		5.45779		7.08474		6.01247		6.41516		6.369		7.08932		5.99705		6.40616		6.35658		6.16179		5.92732		6.31926		6.08263		6.20058		5.77647		5.96553		5.94153		6.18442		5.75289		5.94437
	2.56211	5 2Σ		2.97537	2.54695		2.68463		2.53679		2.67847		2.61742		2.57032		2.63426		2.61332		2.60526		2.56016		2.62211		2.603		2.63779		2.62795		2.51284		2.50258		2.63947		2.59632		2.64553		2.64037		2.63074		2.58574		2.63537
BS–	4.39789	3-4 2Π		4.63105	4.282		4.43326		4.27111		4.42811		4.57863		4.36342		4.51221		4.53663		4.57647		4.35726		4.50763		4.53347		4.43689		4.41847		4.40468		4.38626		4.46837		4.36742		4.45337		4.45405		4.46263		4.35926		4.44763
	2.42632	5 2Σ		3.08347	2.35742		2.67553		2.33826		2.66637		2.55968		2.43632		2.49837		2.53095		2.54195		2.41816		2.47621		2.51037		2.54842		2.51832		2.37442		2.34432		2.50842		2.44284		2.49547		2.49916		2.48926		2.42511		2.47674
CH3–	0.406316	4 2A1		0.725632	-0.00921053		0.119895		-0.0317895		0.105316		0.652263		0.27		0.439526		0.500842		0.648684		0.259842		0.429526		0.492684		0.518474		0.442158		0.439842		0.363526		0.484474		0.288684		0.411158		0.418526		0.475737		0.276526		0.4
Cl–	3.54368	2-4 2Tu		4.08889	3.15226		3.47032		3.12984		3.45932		3.89037		3.50963		3.74663		3.764		3.88537		3.49821		3.73763		3.75684		3.565		3.513		3.54158		3.48958		3.64647		3.47789		3.60032		3.60026		3.63489		3.46532		3.58774
CN–	3.92895	3 2Σ		5.265	3.57621		4.18579		3.54205		4.16921		4.26479		3.86421		3.89316		4.07237		4.24221		3.89647		3.86074		4.04579		4.24053		4.12532		4.01005		3.89584		4.04563		3.89353		3.93484		3.96889		4.01947		3.86595		3.90526
	5.09211	4-5 2Π		5.22432	4.82084		5.05684		4.80737		5.05211		5.29726		4.94174		5.02174		5.16426		5.29968		4.93416		5.01432		5.16168		5.45789		5.36411		5.35032		5.25837		5.23153		4.99895		5.13774		5.15847		5.23179		4.99421		5.135
CP–	2.91053	3 2Σ		4.37863	2.57284		3.29763		2.52284		3.27463		3.50584		2.97095		2.827		3.16374		3.47926		2.93737		2.78158		3.12774		3.54242		3.32253		3.18121		2.96632		3.20242		2.95653		2.98853		3.06126		3.16884		2.92095		2.94995
	3.74789	4-5 2Π		3.43368	3.68721		3.68442		3.69958		3.69353		3.61295		3.70411		3.48079		3.63247		3.62121		3.71789		3.48263		3.64074		3.96679		3.92626		3.82026		3.78258		3.75747		3.52811		3.71695		3.74442		3.77158		3.52142		3.72905
F–	3.34368	2-4 2Tu		4.92105	1.295		2.47947		1.23058		2.44847		6.81237		4.21116		4.99737		4.69911		6.84889		4.19989		4.99795		4.69553		4.299		3.68874		4.79868		4.15784		4.66721		3.72163		4.03621		3.95589		4.66247		3.70305		4.02105
HAlCl–	1.99368	6 2A'		1.85116	1.86995		1.98332		1.87021		1.98616		1.97084		1.86137		2.103		1.99816		1.97511		1.86263		2.11426		2.004		1.836		1.83858		1.78974		1.79232		1.95032		1.86368		1.98405		1.97468		1.954		1.86453		1.98974
HAlP–	3.86526	3 2Σ		4.26495	3.35558		3.77442		3.32384		3.75984		4.42426		3.75553		4.07616		4.11274		4.43111		3.74111		4.06858		4.10658		3.95226		3.83758		3.91337		3.79911		3.98895		3.70737		3.88053		3.88174		3.97779		3.68979		3.86537
	2.22947	4-5 2Π		2.06342	1.81732		1.94947		1.80642		1.94574		2.41795		1.93874		2.23658		2.27205		2.43479		1.93474		2.245		2.28089		2.18184		2.12216		2.17089		2.11163		2.21405		1.95684		2.15579		2.15616		2.22032		1.95468		2.16005
HBF–	0.622105	6 2A'		0.827105	0.397211		0.520211		0.386474		0.513053		0.659895		0.501263		0.693737		0.661158		0.654579		0.493105		0.689		0.654		0.534947		0.522842		0.473526		0.461421		0.623842		0.528263		0.630053		0.625632		0.616105		0.520947		0.623737
HBN–	3.85789	3 2Σ		5.81737	2.41642		3.64674		2.34342		3.61274		6.46926		4.15558		4.48095		4.59242		6.48711		4.12874		4.45353		4.56642		4.842		4.20468		4.776		4.14347		4.71742		3.88826		4.08547		4.10268		4.69184		3.85226		4.04889
	3.05789	4-5 2Π		3.11811	2.37763		2.68942		2.34974		2.67811		3.70495		2.81758		3.13005		3.23995		3.72737		2.81058		3.13063		3.24479		3.48058		3.26926		3.44874		3.23868		3.31111		2.85879		3.10305		3.11221		3.31837		2.85263		3.10289
HCC–	3.11316	3 2Σ		4.67858	2.69558		3.39542		2.651		3.37284		3.64316		3.15716		3.16058		3.35332		3.61558		3.12416		3.122		3.32016		3.47868		3.32537		3.22526		3.07579		3.28584		3.08689		3.14037		3.17968		3.25168		3.05132		3.10279
	3.44789	4-5 2Π		3.41616	3.21326		3.38795		3.20579		3.38763		3.547		3.25679		3.31132		3.45705		3.551		3.25263		3.30832		3.45889		3.74789		3.66753		3.59568		3.51816		3.54289		3.30774		3.46253		3.486		3.54716		3.30558		3.46337
HCO–	0.628947	6 2A'		1.22505	0.14		0.607368		0.113684		0.595632		0.979316		0.538368		0.718053		0.783632		0.972158		0.522368		0.702053		0.770474		0.746474		0.655684		0.663158		0.574211		0.723474		0.518737		0.637105		0.645895		0.710158		0.502		0.621368
HNB–	4.15789	3-4 2Π		4.89795	3.52789		4.02942		3.48716		4.00984		4.89968		4.17153		4.43647		4.49126		4.89926		4.15653		4.42405		4.47968		5.00074		4.17437		4.29142		4.32679		4.39105		4.08416		4.23484		4.238		4.37732		4.06542		4.21668
	1.88211	5 2Σ		2.42179	1.81495		2.00005		1.80021		1.99089		2.01658		1.89468		2.00516		1.99763		2.00242		1.88195		1.99		1.98389		4.10037		3.81411		1.14521		1.20374		1.96389		1.90005		1.96211		1.95895		1.95016		1.88774		1.94737
HNF–	4.22211	6 2A'		5.39747	3.25147		4.13242		3.20389		4.11226		5.139		4.25111		4.55505		4.594		5.132		4.23111		4.53463		4.57542		4.43732		4.23716		4.44068		4.23953		4.456		4.09321		4.25668		4.25358		4.43426		4.06705		4.23011
	1.22316	7 2A''		2.49416	0.534895		1.195		0.491737		1.17242		1.84095		1.229		1.37526		1.48211		1.82621		1.20442		1.34968		1.45895		1.49989		1.34216		1.39332		1.237		1.42074		1.15521		1.26542		1.27932		1.395		1.12705		1.23668
HOO–	2.09474	6 2A'		3.96458	0.891474		2.00432		0.830316		1.97474		3.51321		2.31142		2.58768		2.64179		3.50363		2.28542		2.56168		2.61621		2.55237		2.23811		2.55368		2.24595		2.51537		2.04747		2.20053		2.20095		2.48621		2.01147		2.16495
	1.51895	7 2A''		3.27532	0.171105		1.29411		0.106526		1.26311		2.89842		1.65505		1.96574		1.99253		2.89084		1.62905		1.94032		1.96653		1.85458		1.53689		1.90121		1.58379		1.83879		1.35989		1.52095		1.51337		1.80963		1.26179		1.48579
HPAl–	2.41211	4 2A''		2.46711	2.25979		2.35126		2.25189		2.34895		2.51421		2.306		2.46437		2.48284		2.51605		2.30042		2.46463		2.48268		2.40658		2.38732		2.34516		2.32589		2.43789		2.32084		2.42789		2.42916		2.43658		2.31611		2.42658
	2.19789	5 2A'		2.23874	2.03463		2.23174		2.02789		2.232		2.24653		2.07547		2.25537		2.23495		2.24637		2.07132		2.25521		2.23521		2.13842		2.12416		2.05842		2.04458		2.18879		2.08784		2.19195		2.18795		2.18705		2.08368		2.19021
HPCl–	4.62632	6 2A'		5.17274	4.39268		4.803		4.37253		4.79584		4.81821		4.57211		4.75621		4.76684		4.80705		4.55753		4.74263		4.75368		4.58605		4.56121		4.50637		4.48111		4.64521		4.54526		4.63421		4.63447		4.63047		4.52911		4.61847
	1.65737	7 2A''		1.84311	1.47105		1.67168		1.46032		1.66753		1.74011		1.54947		1.71279		1.71605		1.73679		1.54274		1.70705		1.71174		1.61611		1.59826		1.52805		1.51021		1.671		1.566		1.66658		1.66642		1.66611		1.55826		1.66211
HSiS–	3.97947	5 2A"		4.20537	3.74726		3.92053		3.73095		3.91237		4.17063		3.88432		4.07179		4.10032		4.16905		3.87574		4.06721		4.09616		3.96532		3.93689		3.93768		3.90926		4.00995		3.88016		3.98637		3.98647		4.00321		3.87		3.97863
	2.38737	6 2A'		2.57795	2.124		2.43247		2.11068		2.42874		2.49621		2.24495		2.45132		2.45426		2.49205		2.23679		2.447		2.44953		2.29416		2.27074		2.22637		2.20295		2.36153		2.24332		2.35295		2.35179		2.35421		2.23458		2.34563
HSiSi–	2.41789	4 2A"		2.07774	2.23111		2.27253		2.23863		2.28021		2.29595		2.20726		2.23084		2.28558		2.30821		2.21295		2.24053		2.29684		2.38647		2.36321		2.27711		2.25384		2.33732		2.15316		2.32089		2.32716		2.35142		2.15216		2.33216
	2.37789	5 2A'		2.003	2.25379		2.25479		2.26674		2.26447		2.27421		2.23279		2.22153		2.27		2.28947		2.24189		2.23337		2.28611		2.38958		2.37074		2.28337		2.26453		2.33942		2.01642		2.32558		2.33226		2.35711		1.99311		2.34268
HSS–	2.79474	6 2A'		3.29642	2.43295		2.81321		2.40937		2.80263		3.08079		2.71253		2.92837		2.95763		3.07363		2.69895		2.91579		2.94647		2.77568		2.72584		2.72442		2.67458		2.83321		2.67663		2.79163		2.79232		2.81947		2.66147		2.77647
	2.06737	7 2A''		2.43779	1.69447		2.05432		1.67374		2.04616		2.27737		1.93095		2.14579		2.17505		2.27121		1.91837		2.13563		2.16589		2.00137		1.95753		1.94626		1.90242		2.06089		1.91032		2.02632		2.02742		2.04916		1.89616		2.014
NH2–	0.724737	4 2B1		1.34921	-0.208263		0.210053		-0.252421		0.184053		1.69168		0.706474		1.03079		1.06942		1.70195		0.692053		1.02279		1.06226		1.09079		0.851579		1.11284		0.871632		1.05863		0.627579		0.819263		0.816		1.05032		0.610421		0.803105
OCl–	2.44316	6-7 2Π		3.86958	1.66789		2.52011		1.61589		2.49895		3.60663		2.67511		2.95605		3.00884		3.60047		2.65311		2.93505		2.98826		2.87679		2.65832		2.86979		2.65074		2.87168		2.49821		2.65263		2.65437		2.84753		2.46963		2.62447
OF–	2.61895	6-7 2Π		4.68447	1.63642		2.73826		1.58084		2.71126		3.71937		2.81532		2.98332		3.08605		3.70037		2.78589		2.95189		3.05747		3.066		2.81642		2.98711		2.73937		2.97337		2.61184		2.72563		2.73779		2.94221		2.57726		2.68905
OH–	1.78632	3-4 2π		2.96916	0.111105		1.01095		0.0445263		0.976947		4.49053		2.23626		2.87268		2.722		4.52747		2.22384		2.87068		2.716		2.63305		2.08195		2.92474		2.35363		2.79226		1.93926		2.23		2.18168		2.78795		1.91911		2.21284
PH2–	1.25316	4 2B1		1.24242	1.07716		1.12137		1.07142		1.11821		1.27795		1.11226		1.28005		1.27021		1.27963		1.10768		1.28174		1.27047		1.17789		1.16663		1.10984		1.099		1.24268		1.13342		1.24426		1.24226		1.24237		1.13068		1.24537
SCl–	2.68474	6-7 2Π		3.21211	2.384		2.76526		2.36142		2.75568		2.90637		2.60821		2.78621		2.81937		2.89763		2.59363		2.77305		2.80763		2.67832		2.63647		2.59789		2.55563		2.72437		2.59163		2.69421		2.69547		2.71063		2.57505		2.67805
SF–	2.49895	6-7 2Π		2.97447	2.22095		2.54505		2.20279		2.53647		2.68589		2.42632		2.60342		2.62505		2.67674		2.41374		2.59084		2.61489		2.50984		2.474		2.42942		2.394		2.56816		2.43774		2.54358		2.54484		2.556		2.42416		2.53042
SH–	2.29053	3-4 2Π		2.58737	1.95905		2.17916		1.94189		2.17058		2.51647		2.18537		2.41447		2.43205		2.51432		2.17679		2.40932		2.42689		2.27374		2.23347		2.22779		2.18753		2.34542		2.18589		2.313		2.31268		2.33726		2.17574		2.30526
SiH3–	1.87632	4 2A'		1.83811	1.73984		1.82953		1.73753		1.82979		1.87626		1.75437		1.96263		1.89405		1.87753		1.75263		1.96874		1.89632		1.73879		1.73837		1.67905		1.68005		1.84168		1.76389		1.86668		1.85858		1.84237		1.76216		1.86837
SiN–	3.02368	3 2Σ		2.89574	2.13368		2.41058		2.08863		2.38968		4.42484		2.69337		3.09758		3.25495		4.50453		2.68495		3.10674		3.27079		3.95063		3.45		3.989		3.48516		3.58463		2.76589		3.12137		3.12774		3.61974		2.76089		3.13221
	3.22947	4-5 2Π		4.21005	2.08579		2.94747		2.01379		2.91547		5.85421		3.27895		3.49258		3.75516		5.92468		3.25811		3.46789		3.73674		4.55868		3.76816		4.41384		3.63995		4.24568		3.25926		3.48579		3.53174		4.24737		3.23568		3.46321
SiP–	3.09632	3 2Σ		3.56468	2.92595		3.28205		2.90321		3.27489		3.39537		3.08		3.15942		3.27168		3.38863		3.06542		3.14284		3.25995		3.33932		3.26363		3.18368		3.10942		3.25311		3.09105		3.18284		3.20137		3.24095		3.07547		3.16911
	3.06789	4-5 2Π		2.63295	2.74879		2.76911		2.75474		2.77379		2.92584		2.70805		2.81121		2.887		2.94111		2.71032		2.82147		2.90111		2.97542		2.94174		2.90984		2.87758		2.91658		2.67389		2.88289		2.89226		2.93026		2.67289		2.89558
	Statistics for signed deviations from CCST(T) All 55 VEDEs.			KT	D2	os-D2	nD-D2	os-nD-D2	D3	OVGF-A	OVGF-B	OVGF-C	nD-D3	nD-OVGF-A	nD-OVGF-B	nD-OVGF-C	P3	P3+	Q3	Q3+	L3	L3+A	L3+B	L3+C	nD-L3	nD-L3+A	nD-L3+B	nD-L3+C	DR	RP3	RQ3	RL3	nD-RL3	ND2	2ph-TDA	3+	NR2	BD-T1	ADC(3)	NRP3	NRQ3	NRL3
				0.563293	-0.495223	-0.0807014	-0.521709	-0.0927388	0.553427	-0.0239142	0.174429	0.212665	0.555204	-0.0344854	0.165134	0.204674	0.267466	0.107069	0.159434	0.0201167	0.207313	-0.0714976	0.071622	0.0731856	0.199286	-0.0873952	0.0599254	0.0615914	0.131617	-0.0764287	-0.1007	-0.0339043	-0.05331	-0.516909	-0.530497	0.210801	-0.0804967	0.0491359	0.139234	-0.0710842	-0.114974	-0.0503005
				0.635522	0.466625	0.252564	0.487391	0.257879	0.774641	0.194058	0.306576	0.266957	0.791839	0.200948	0.30966	0.268921	0.448769	0.30572	0.441704	0.259262	0.33994	0.147457	0.166375	0.154282	0.332225	0.132056	0.154196	0.139566	0.232277	0.14646	0.158134	0.0931865	0.0879272	0.251942	0.244104	0.321498	0.117632	0.0921404	0.241843	0.137301	0.160122	0.101411
	Statistics for absolute deviations from CCST(T) All 55 VEDEs.			KT	D2	os-D2	nD-D2	os-nD-D2	D3	OVGF-A	OVGF-B	OVGF-C	nD-D3	nD-OVGF-A	nD-OVGF-B	nD-OVGF-C	P3	P3+	Q3	Q3+	L3	L3+A	L3+B	L3+C	nD-L3	nD-L3+A	nD-L3+B	nD-L3+C	DR	RP3	RQ3	RL3	nD-RL3	ND2	2ph-TDA	3+	NR2	BD-T1	ADC(3)	NRP3	NRQ3	NRL3
				0.635344	0.499162	0.183831	0.525409	0.188664	0.572891	0.135979	0.218632	0.232536	0.572617	0.141778	0.215905	0.222704	0.31053	0.170506	0.284001	0.173967	0.223809	0.12566	0.0965809	0.0973866	0.215164	0.125087	0.0838144	0.0838249	0.215313	0.134524	0.165428	0.0806967	0.089423	0.516909	0.530497	0.228831	0.127997	0.0714995	0.199124	0.134164	0.176366	0.0869187
				2.06553	2.04868	0.864211	2.11311	0.895211	3.46868	0.867474	1.65368	1.35542	3.50521	0.856211	1.65426	1.35184	2.21826	1.932	1.67537	0.955632	1.444	0.463579	0.750684	0.664737	1.44984	0.395	0.734684	0.647579	0.803895	0.631158	0.404316	0.271421	0.230632	1.32626	1.12505	1.40268	0.250211	0.366158	0.805893	0.463684	0.389947	0.366421
[truncated: 109 more columns]

## Sheet: Cubic_CBS-a23-VEDEs_Extrapola
				aDZ	aTZ	CBS	aDZ	aTZ	CBS	aDZ	aTZ	CBS	aDZ	aTZ	CBS	aDZ	aTZ	CBS	aDZ	aTZ	CBS	aDZ	aTZ	CBS	aDZ	aTZ	CBS	aDZ	aTZ	CBS	aDZ	aTZ	CBS	aDZ	aTZ	CBS	aDZ	aTZ	CBS	aDZ	aTZ	CBS	aDZ	aTZ	CBS	aDZ	aTZ	CBS	aDZ
Anions	CCSD(T) VEDE	Final State		KT			D2			os-D2			nD-D2			os-nD-D2			D3			OVGF-A			OVGF-B			OVGF-C			nD-D3			nD-OVGF-A			nD-OVGF-B			nD-OVGF-C			P3			P3+			Q3
AlH4–		2-4 2T2		5.362	5.395	5.40889	4.813	4.966	5.03042	5.028	5.175	5.23689	4.805	4.959	5.02384	5.023	5.172	5.23474	4.85	4.957	5.00205	4.835	4.962	5.01547	4.976	5.082	5.12663	4.906	4.948	4.96568	4.84	4.948	4.99347	4.826	4.954	5.00789	4.967	5.074	5.11905	4.893	4.935	4.95268	4.621	4.779	4.84553	4.631	4.79	4.85695	4.615
AlO–		3-4 2Π		4.655	4.669	4.67489	1.52	1.733	1.82268	2.469	2.643	2.71626	1.428	1.644	1.73495	2.423	2.598	2.67168	X	7.442	#VALUE!	X	4.01	#VALUE!	X	4.909	#VALUE!	X	4.531	#VALUE!	X	X	#VALUE!	X	X	#VALUE!	X	X	#VALUE!	X	X	#VALUE!	4.216	4.485	4.59826	3.582	3.823	3.92447	4.944
		5 2Σ		2.76	2.752	2.74863	2.194	2.306	2.35316	2.452	2.551	2.59268	2.179	2.294	2.34242	2.446	2.546	2.58811	3.087	3.133	3.15237	2.588	2.606	2.61358	2.937	2.973	2.98816	2.908	2.959	2.98047	3.099	3.147	3.16721	2.585	2.603	2.61058	2.944	2.982	2.998	2.914	2.967	2.98932	2.635	2.759	2.81121	2.566	2.686	2.73653	2.689
AlS–		3-4 2Π		3.812	3.803	3.79921	2.808	2.963	3.02826	3.132	3.255	3.30679	2.779	2.939	3.00637	3.118	3.242	3.29421	3.724	3.741	3.74816	3.319	3.329	3.33321	3.558	3.575	3.58216	3.531	3.581	3.60205	3.721	3.739	3.74658	3.307	3.318	3.32263	3.55	3.567	3.57416	3.522	3.573	3.59447	3.196	3.341	3.40205	3.144	3.288	3.34863	3.294
		5 2Σ		2.804	2.796	2.79263	2.43	2.538	2.58347	2.646	2.741	2.781	2.42	2.53	2.57632	2.642	2.739	2.77984	2.748	2.802	2.82474	2.555	2.611	2.63458	2.767	2.818	2.83947	2.74	2.791	2.81247	2.746	2.802	2.82558	2.549	2.606	2.63	2.765	2.819	2.84174	2.737	2.791	2.81374	2.524	2.64	2.68884	2.513	2.626	2.67358	2.502
BH4–		2-4 2T2		5.164	5.187	5.19668	4.347	4.498	4.56158	4.699	4.837	4.89511	4.334	4.486	4.55	4.692	4.832	4.89095	4.667	4.723	4.74658	4.528	4.608	4.64168	4.699	4.747	4.76721	4.673	4.722	4.74263	4.656	4.713	4.737	4.517	4.598	4.63211	4.689	4.737	4.75721	4.662	4.712	4.73305	4.372	4.531	4.59795	4.37	4.528	4.59453	4.358
BO–		3-4 2Π		6.867	6.857	6.85279	4.533	4.711	4.78595	5.285	5.425	5.48395	4.474	4.655	4.73121	5.256	5.398	5.45779	7.116	7.094	7.08474	6.075	6.031	6.01247	6.499	6.44	6.41516	6.342	6.361	6.369	7.122	7.099	7.08932	6.061	6.016	5.99705	6.49	6.431	6.40616	6.331	6.349	6.35658	5.852	6.07	6.16179	5.636	5.841	5.92732	6.18
		5 2Σ		2.964	2.972	2.97537	2.348	2.488	2.54695	2.507	2.632	2.68463	2.335	2.477	2.53679	2.498	2.625	2.67847	2.481	2.577	2.61742	2.414	2.524	2.57032	2.522	2.601	2.63426	2.484	2.575	2.61332	2.466	2.564	2.60526	2.401	2.513	2.56016	2.507	2.588	2.62211	2.468	2.563	2.603	2.409	2.57	2.63779	2.402	2.561	2.62795	2.321
BS–		3-4 2Π		4.641	4.634	4.63105	4.039	4.21	4.282	4.24	4.376	4.43326	4.021	4.197	4.27111	4.232	4.37	4.42811	4.509	4.558	4.57863	4.281	4.339	4.36342	4.444	4.492	4.51221	4.44	4.508	4.53663	4.504	4.555	4.57647	4.272	4.332	4.35726	4.438	4.487	4.50763	4.434	4.504	4.53347	4.201	4.367	4.43689	4.184	4.349	4.41847	4.264
		5 2Σ		3.092	3.086	3.08347	2.167	2.301	2.35742	2.505	2.625	2.67553	2.145	2.281	2.33826	2.493	2.615	2.66637	2.446	2.526	2.55968	2.307	2.398	2.43632	2.406	2.471	2.49837	2.413	2.496	2.53095	2.424	2.507	2.54195	2.286	2.379	2.41816	2.381	2.448	2.47621	2.391	2.475	2.51037	2.331	2.484	2.54842	2.308	2.456	2.51832	2.211
CH3–		4 2A1		0.683	0.713	0.725632	-0.238	-0.077	-0.00921053	-0.062	0.066	0.119895	-0.262	-0.1	-0.0317895	-0.078	0.051	0.105316	0.513	0.611	0.652263	0.162	0.238	0.27	0.35	0.413	0.439526	0.363	0.46	0.500842	0.508	0.607	0.648684	0.149	0.227	0.259842	0.34	0.403	0.429526	0.352	0.451	0.492684	0.176	0.417	0.518474	0.121	0.347	0.442158	0.194
Cl–		2-4 2Tu		4.096	4.091	4.08889	2.905	3.079	3.15226	3.287	3.416	3.47032	2.884	3.057	3.12984	3.276	3.405	3.45932	3.852	3.879	3.89037	3.494	3.505	3.50963	3.704	3.734	3.74663	3.683	3.74	3.764	3.847	3.874	3.88537	3.484	3.494	3.49821	3.695	3.725	3.73763	3.673	3.732	3.75684	3.349	3.501	3.565	3.297	3.449	3.513	3.435
CN–		3 2Σ		5.238	5.257	5.265	3.292	3.492	3.57621	3.93	4.11	4.18579	3.255	3.457	3.54205	3.912	4.093	4.16921	4.117	4.221	4.26479	3.769	3.836	3.86421	3.788	3.862	3.89316	3.899	4.021	4.07237	4.093	4.198	4.24221	3.743	3.851	3.89647	3.757	3.83	3.86074	3.871	3.994	4.04579	3.908	4.142	4.24053	3.807	4.031	4.12532	3.777
		4-5 2Π		5.23	5.226	5.22432	4.548	4.74	4.82084	4.838	4.992	5.05684	4.526	4.724	4.80737	4.829	4.986	5.05211	5.266	5.288	5.29726	4.865	4.919	4.94174	5.026	5.023	5.02174	5.079	5.139	5.16426	5.267	5.29	5.29968	4.856	4.911	4.93416	5.02	5.016	5.01432	5.075	5.136	5.16168	5.141	5.364	5.45789	5.06	5.274	5.36411	5.167
CP–		3 2Σ		4.39	4.382	4.37863	2.381	2.516	2.57284	3.12	3.245	3.29763	2.331	2.466	2.52284	3.097	3.222	3.27463	3.395	3.473	3.50584	2.88	2.944	2.97095	2.773	2.811	2.827	3.033	3.125	3.16374	3.367	3.446	3.47926	2.845	2.91	2.93737	2.729	2.766	2.78158	2.997	3.089	3.12774	3.298	3.47	3.54242	3.098	3.256	3.32253	3.032
		4-5 2Π		3.455	3.44	3.43368	3.484	3.627	3.68721	3.521	3.636	3.68442	3.485	3.636	3.69958	3.523	3.643	3.69353	3.549	3.594	3.61295	3.481	3.638	3.70411	3.441	3.469	3.48079	3.533	3.603	3.63247	3.553	3.601	3.62121	3.482	3.648	3.71789	3.44	3.47	3.48263	3.537	3.61	3.64074	3.738	3.899	3.96679	3.706	3.861	3.92626	3.681
F–		2-4 2Tu		4.931	4.924	4.92105	1.025	1.215	1.295	2.272	2.418	2.47947	0.962	1.151	1.23058	2.241	2.387	2.44847	6.612	6.753	6.81237	4.322	4.244	4.21116	5.067	5.018	4.99737	4.638	4.681	4.69911	6.64	6.787	6.84889	4.315	4.234	4.19989	5.069	5.019	4.99795	4.633	4.677	4.69553	3.786	4.147	4.299	3.261	3.562	3.68874	4.496
HAlCl–		6 2A'		1.854	1.852	1.85116	1.698	1.819	1.86995	1.827	1.937	1.98332	1.694	1.818	1.87021	1.827	1.939	1.98616	1.86	1.938	1.97084	1.742	1.826	1.86137	1.995	2.071	2.103	1.92	1.975	1.99816	1.86	1.941	1.97511	1.739	1.826	1.86263	2.002	2.081	2.11426	1.923	1.98	2.004	1.647	1.78	1.836	1.651	1.783	1.83858	1.632
HAlP–		3 2Σ		4.309	4.278	4.26495	3.195	3.308	3.35558	3.638	3.734	3.77442	3.159	3.275	3.32384	3.622	3.719	3.75984	4.42	4.423	4.42426	3.774	3.761	3.75553	4.079	4.077	4.07616	4.063	4.098	4.11274	4.424	4.429	4.43111	3.761	3.747	3.74111	4.07	4.069	4.06858	4.054	4.091	4.10658	3.786	3.903	3.95226	3.677	3.79	3.83758	3.848
		4-5 2Π		2.062	2.063	2.06342	1.634	1.763	1.81732	1.796	1.904	1.94947	1.616	1.75	1.80642	1.788	1.899	1.94574	2.381	2.407	2.41795	1.916	1.932	1.93874	2.211	2.229	2.23658	2.201	2.251	2.27205	2.395	2.423	2.43479	1.912	1.928	1.93474	2.218	2.237	2.245	2.207	2.259	2.28089	1.99	2.125	2.18184	1.936	2.067	2.12216	2.07
HBF–		6 2A'		0.793	0.817	0.827105	0.194	0.337	0.397211	0.344	0.468	0.520211	0.179	0.325	0.386474	0.334	0.46	0.513053	0.505	0.614	0.659895	0.362	0.46	0.501263	0.563	0.655	0.693737	0.529	0.622	0.661158	0.494	0.607	0.654579	0.351	0.451	0.493105	0.554	0.649	0.689	0.519	0.614	0.654	0.255	0.452	0.534947	0.25	0.442	0.522842	0.249
HBN–		3 2Σ		5.86	5.83	5.81737	2.199	2.352	2.41642	3.462	3.592	3.64674	2.126	2.279	2.34342	3.428	3.558	3.61274	6.465	6.468	6.46926	4.211	4.172	4.15558	4.579	4.51	4.48095	4.537	4.576	4.59242	6.48	6.485	6.48711	4.187	4.146	4.12874	4.553	4.483	4.45353	4.511	4.55	4.56642	4.518	4.746	4.842	3.929	4.123	4.20468	4.641
		4-5 2Π		3.111	3.116	3.11811	2.146	2.309	2.37763	2.499	2.633	2.68942	2.111	2.279	2.34974	2.482	2.62	2.67811	3.695	3.702	3.70495	2.819	2.818	2.81758	3.167	3.141	3.13005	3.176	3.221	3.23995	3.716	3.724	3.72737	2.812	2.811	2.81058	3.169	3.142	3.13063	3.178	3.225	3.24479	3.185	3.393	3.48058	2.995	3.188	3.26926	3.291
HCC–		3 2Σ		4.653	4.671	4.67858	2.427	2.616	2.69558	3.151	3.323	3.39542	2.381	2.571	2.651	3.127	3.3	3.37284	3.511	3.604	3.64316	3.025	3.118	3.15716	3.081	3.137	3.16058	3.197	3.307	3.35332	3.482	3.576	3.61558	2.992	3.085	3.12416	3.041	3.098	3.122	3.161	3.273	3.32016	3.149	3.381	3.47868	3.017	3.234	3.32537	3.005
		4-5 2Π		3.419	3.417	3.41616	2.966	3.14	3.21326	3.189	3.329	3.38795	2.95	3.13	3.20579	3.183	3.327	3.38763	3.52	3.539	3.547	3.163	3.229	3.25679	3.317	3.313	3.31132	3.386	3.436	3.45705	3.524	3.543	3.551	3.156	3.224	3.25263	3.314	3.31	3.30832	3.385	3.437	3.45889	3.458	3.662	3.74789	3.389	3.585	3.66753	3.428
HCO–		6 2A'		1.181	1.212	1.22505	-0.184	0.044	0.14	0.326	0.524	0.607368	-0.216	0.016	0.113684	0.31	0.511	0.595632	0.823	0.933	0.979316	0.392	0.495	0.538368	0.593	0.681	0.718053	0.606	0.731	0.783632	0.813	0.925	0.972158	0.376	0.479	0.522368	0.577	0.665	0.702053	0.59	0.717	0.770474	0.377	0.637	0.746474	0.299	0.55	0.655684	0.396
HNB–		3-4 2Π		4.888	4.895	4.89795	3.265	3.45	3.52789	3.812	3.965	4.02942	3.22	3.408	3.48716	3.791	3.945	4.00984	4.894	4.898	4.89968	4.163	4.169	4.17153	4.472	4.447	4.43647	4.433	4.474	4.49126	4.895	4.898	4.89926	4.148	4.154	4.15653	4.461	4.435	4.42405	4.42	4.462	4.47968	4.141	4.746	5.00074	4.001	4.123	4.17437	4.641
		5 2Σ		2.409	2.418	2.42179	1.616	1.756	1.81495	1.821	1.947	2.00005	1.597	1.74	1.80021	1.809	1.937	1.99089	1.883	1.977	2.01658	1.754	1.853	1.89468	1.9	1.974	2.00516	1.874	1.961	1.99763	1.866	1.962	2.00242	1.737	1.839	1.88195	1.882	1.958	1.99	1.856	1.946	1.98389	1.713	3.393	4.10037	1.701	3.188	3.81411	3.291
HNF–		6 2A'		5.406	5.4	5.39747	2.963	3.166	3.25147	3.888	4.06	4.13242	2.914	3.118	3.20389	3.865	4.039	4.11226	5.058	5.115	5.139	4.217	4.241	4.25111	4.538	4.55	4.55505	4.486	4.562	4.594	5.051	5.108	5.132	4.197	4.221	4.23111	4.519	4.53	4.53463	4.466	4.543	4.57542	4.065	4.327	4.43732	3.889	4.134	4.23716	4.219
		7 2A''		2.47	2.487	2.49416	0.191	0.433	0.534895	0.898	1.107	1.195	0.145	0.389	0.491737	0.874	1.084	1.17242	1.669	1.79	1.84095	1.094	1.189	1.229	1.263	1.342	1.37526	1.286	1.424	1.48211	1.65	1.774	1.82621	1.068	1.164	1.20442	1.236	1.316	1.34968	1.26	1.4	1.45895	1.075	1.374	1.49989	0.94	1.223	1.34216	1.102
HOO–		6 2A'		3.966	3.965	3.96458	0.576	0.798	0.891474	1.74	1.926	2.00432	0.512	0.736	0.830316	1.709	1.896	1.97474	3.391	3.477	3.51321	2.256	2.295	2.31142	2.555	2.578	2.58768	2.494	2.598	2.64179	3.38	3.467	3.50363	2.23	2.269	2.28542	2.529	2.552	2.56168	2.467	2.572	2.61621	2.136	2.429	2.55237	1.853	2.124	2.23811	2.305
		7 2A''		3.254	3.269	3.27532	-0.187	0.065	0.171105	0.99	1.204	1.29411	-0.253	0	0.106526	0.959	1.173	1.26311	2.762	2.858	2.89842	1.584	1.634	1.65505	1.916	1.951	1.96574	1.822	1.942	1.99253	2.753	2.85	2.89084	1.558	1.608	1.62905	1.892	1.926	1.94032	1.796	1.916	1.96653	1.397	1.719	1.85458	1.112	1.411	1.53689	1.617
HPAl–		4 2A''		2.46	2.465	2.46711	2.031	2.192	2.25979	2.158	2.294	2.35126	2.016	2.182	2.25189	2.15	2.29	2.34895	2.419	2.486	2.51421	2.198	2.274	2.306	2.372	2.437	2.46437	2.372	2.45	2.48284	2.418	2.487	2.51605	2.191	2.268	2.30042	2.368	2.436	2.46463	2.369	2.449	2.48268	2.165	2.335	2.40658	2.15	2.317	2.38732	2.186
		5 2A'		2.243	2.24	2.23874	1.857	1.982	2.03463	2.074	2.185	2.23174	1.846	1.974	2.02789	2.07	2.184	2.232	2.157	2.22	2.24653	1.976	2.046	2.07547	2.163	2.228	2.25537	2.144	2.208	2.23495	2.154	2.219	2.24637	1.969	2.041	2.07132	2.16	2.227	2.25521	2.14	2.207	2.23521	1.948	2.082	2.13842	1.938	2.069	2.12416	1.922
HPCl–		6 2A'		5.177	5.174	5.17274	4.144	4.319	4.39268	4.587	4.739	4.803	4.121	4.298	4.37253	4.577	4.731	4.79584	4.696	4.782	4.81821	4.457	4.538	4.57211	4.634	4.72	4.75621	4.629	4.726	4.76684	4.682	4.77	4.80705	4.441	4.523	4.55753	4.619	4.706	4.74263	4.613	4.712	4.75368	4.326	4.509	4.58605	4.304	4.485	4.56121	4.333
		7 2A''		1.836	1.841	1.84311	1.184	1.386	1.47105	1.423	1.598	1.67168	1.169	1.374	1.46032	1.416	1.593	1.66753	1.544	1.682	1.74011	1.369	1.496	1.54947	1.511	1.653	1.71279	1.51	1.655	1.71605	1.535	1.677	1.73679	1.358	1.488	1.54274	1.501	1.646	1.70705	1.5	1.649	1.71174	1.312	1.526	1.61611	1.297	1.509	1.59826	1.295
HSiS–		5 2A"		4.221	4.21	4.20537	3.527	3.682	3.74726	3.75	3.87	3.92053	3.505	3.664	3.73095	3.739	3.861	3.91237	4.128	4.158	4.17063	3.836	3.87	3.88432	4.032	4.06	4.07179	4.025	4.078	4.10032	4.125	4.156	4.16905	3.826	3.861	3.87574	4.026	4.055	4.06721	4.018	4.073	4.09616	3.755	3.903	3.96532	3.728	3.875	3.93689	3.824
		6 2A'		2.541	2.567	2.57795	1.827	2.036	2.124	2.171	2.355	2.43247	1.808	2.021	2.11068	2.163	2.35	2.42874	2.32	2.444	2.49621	2.073	2.194	2.24495	2.268	2.397	2.45132	2.261	2.397	2.45426	2.313	2.439	2.49205	2.062	2.185	2.23679	2.258	2.391	2.447	2.252	2.391	2.44953	2	2.207	2.29416	1.978	2.184	2.27074	1.999
HSiSi–		4 2A"		2.082	2.079	2.07774	2.062	2.181	2.23111	2.129	2.23	2.27253	2.061	2.186	2.23863	2.131	2.236	2.28021	2.232	2.277	2.29595	2.068	2.166	2.20726	2.174	2.214	2.23084	2.206	2.262	2.28558	2.24	2.288	2.30821	2.068	2.17	2.21295	2.178	2.222	2.24053	2.213	2.272	2.29684	2.206	2.333	2.38647	2.187	2.311	2.36321	2.162
		5 2A'		2.003	2.003	2.003	2.079	2.202	2.25379	2.107	2.211	2.25479	2.082	2.212	2.26674	2.111	2.219	2.26447	2.206	2.254	2.27421	2.058	2.181	2.23279	2.159	2.203	2.22153	2.189	2.246	2.27	2.217	2.268	2.28947	2.06	2.188	2.24189	2.168	2.214	2.23337	2.198	2.26	2.28611	2.202	2.334	2.38958	2.186	2.316	2.37074	2.164
HSS–		6 2A'		3.295	3.296	3.29642	2.153	2.35	2.43295	2.583	2.745	2.81321	2.128	2.326	2.40937	2.571	2.734	2.80263	2.933	3.037	3.08079	2.596	2.678	2.71253	2.782	2.885	2.92837	2.78	2.905	2.95763	2.923	3.029	3.07363	2.581	2.664	2.69895	2.768	2.872	2.91579	2.766	2.893	2.94647	2.5	2.694	2.77568	2.453	2.645	2.72584	2.534
		7 2A''		2.425	2.434	2.43779	1.379	1.601	1.69447	1.79	1.976	2.05432	1.354	1.579	1.67374	1.779	1.967	2.04616	2.104	2.226	2.27737	1.786	1.888	1.93095	1.971	2.094	2.14579	1.969	2.114	2.17505	2.095	2.219	2.27121	1.772	1.875	1.91837	1.958	2.083	2.13563	1.957	2.104	2.16589	1.693	1.91	2.00137	1.652	1.867	1.95753	1.726
NH2–		4 2B1		1.308	1.337	1.34921	-0.501	-0.295	-0.208263	-0.023	0.141	0.210053	-0.548	-0.34	-0.252421	-0.049	0.115	0.184053	1.524	1.642	1.69168	0.634	0.685	0.706474	0.964	1.011	1.03079	0.906	1.021	1.06942	1.53	1.651	1.70195	0.621	0.671	0.692053	0.956	1.003	1.02279	0.896	1.013	1.06226	0.646	0.959	1.09079	0.448	0.732	0.851579	0.813
OCl–		6-7 2Π		3.871	3.87	3.86958	1.324	1.566	1.66789	2.243	2.438	2.52011	1.272	1.514	1.61589	2.219	2.416	2.49895	3.456	3.562	3.60663	2.587	2.649	2.67511	2.858	2.927	2.95605	2.817	2.952	3.00884	3.447	3.555	3.60047	2.565	2.627	2.65311	2.837	2.906	2.93505	2.795	2.931	2.98826	2.486	2.761	2.87679	2.286	2.548	2.65832	2.614
OF–		6-7 2Π		4.693	4.687	4.68447	1.311	1.54	1.63642	2.464	2.657	2.73826	1.254	1.484	1.58084	2.437	2.63	2.71126	3.6	3.684	3.71937	2.74	2.793	2.81532	2.935	2.969	2.98332	2.934	3.041	3.08605	3.581	3.665	3.70037	2.712	2.764	2.78589	2.905	2.938	2.95189	2.904	3.012	3.05747	2.661	2.946	3.066	2.437	2.704	2.81642	2.737
OH–		3-4 2π		2.945	2.962	2.96916	-0.166	0.029	0.111105	0.785	0.944	1.01095	-0.234	-0.038	0.0445263	0.751	0.91	0.976947	4.212	4.408	4.49053	2.259	2.243	2.23626	2.867	2.871	2.87268	2.587	2.682	2.722	4.239	4.442	4.52747	2.248	2.231	2.22384	2.865	2.869	2.87068	2.581	2.676	2.716	2.103	2.476	2.63305	1.64	1.951	2.08195	2.578
PH2–		4 2B1		1.214	1.234	1.24242	0.81	0.998	1.07716	0.894	1.054	1.12137	0.8	0.991	1.07142	0.888	1.05	1.11821	1.106	1.227	1.27795	0.946	1.063	1.11226	1.101	1.227	1.28005	1.094	1.218	1.27021	1.102	1.227	1.27963	0.94	1.058	1.10768	1.097	1.227	1.28174	1.09	1.217	1.27047	0.888	1.092	1.17789	0.881	1.082	1.16663	0.891
SCl–		6-7 2Π		3.232	3.218	3.21211	2.114	2.304	2.384	2.545	2.7	2.76526	2.09	2.281	2.36142	2.534	2.69	2.75568	2.76	2.863	2.90637	2.486	2.572	2.60821	2.637	2.742	2.78621	2.646	2.768	2.81937	2.747	2.853	2.89763	2.47	2.557	2.59363	2.621	2.728	2.77305	2.63	2.755	2.80763	2.414	2.6	2.67832	2.375	2.559	2.63647	2.416
SF–		6-7 2Π		2.983	2.977	2.97447	1.941	2.138	2.22095	2.312	2.476	2.54505	1.92	2.119	2.20279	2.302	2.467	2.53647	2.531	2.64	2.68589	2.297	2.388	2.42632	2.44	2.555	2.60342	2.446	2.572	2.62505	2.519	2.63	2.67674	2.283	2.375	2.41374	2.426	2.542	2.59084	2.433	2.561	2.61489	2.237	2.429	2.50984	2.204	2.394	2.474	2.239
SH–		3-4 2Π		2.576	2.584	2.58737	1.699	1.882	1.95905	1.966	2.116	2.17916	1.679	1.864	1.94189	1.956	2.107	2.17058	2.39	2.479	2.51647	2.093	2.158	2.18537	2.288	2.377	2.41447	2.28	2.387	2.43205	2.385	2.476	2.51432	2.083	2.149	2.17679	2.28	2.371	2.40932	2.272	2.381	2.42689	2.008	2.195	2.27374	1.972	2.156	2.23347	2.053
SiH3–		4 2A'		1.831	1.836	1.83811	1.521	1.675	1.73984	1.632	1.771	1.82953	1.513	1.671	1.73753	1.628	1.77	1.82979	1.737	1.835	1.87626	1.608	1.711	1.75437	1.812	1.918	1.96263	1.769	1.857	1.89405	1.734	1.835	1.87753	1.602	1.708	1.75263	1.811	1.922	1.96874	1.767	1.858	1.89632	1.51	1.671	1.73879	1.511	1.671	1.73837	1.5
SiN–		3 2Σ		2.927	2.905	2.89574	1.966	2.084	2.13368	2.277	2.371	2.41058	1.911	2.036	2.08863	2.249	2.348	2.38968	4.449	4.432	4.42484	2.763	2.714	2.69337	3.207	3.13	3.09758	3.218	3.244	3.25495	4.523	4.51	4.50453	2.756	2.706	2.68495	3.219	3.14	3.10674	3.231	3.259	3.27079	3.692	3.874	3.95063	3.234	3.386	3.45	3.881
		4-5 2Π		4.193	4.205	4.21005	1.938	2.042	2.08579	2.794	2.902	2.94747	1.866	1.97	2.01379	2.762	2.87	2.91547	5.597	5.778	5.85421	3.296	3.284	3.27895	3.521	3.501	3.49258	3.65	3.724	3.75516	5.649	5.843	5.92468	3.278	3.264	3.25811	3.502	3.478	3.46789	3.633	3.706	3.73674	4.229	4.461	4.55868	3.528	3.697	3.76816	4.222
SiP–		3 2Σ		3.586	3.571	3.56468	2.754	2.875	2.92595	3.13	3.237	3.28205	2.727	2.851	2.90321	3.12	3.229	3.27489	3.303	3.368	3.39537	2.999	3.056	3.08	3.077	3.135	3.15942	3.158	3.238	3.27168	3.292	3.36	3.38863	2.983	3.041	3.06542	3.059	3.118	3.14284	3.142	3.225	3.25995	3.156	3.285	3.33932	3.086	3.211	3.26363	3.07
		4-5 2Π		2.65	2.638	2.63295	2.574	2.697	2.74879	2.627	2.727	2.76911	2.57	2.7	2.75474	2.626	2.73	2.77379	2.869	2.909	2.92584	2.61	2.679	2.70805	2.77	2.799	2.81121	2.806	2.863	2.887	2.88	2.923	2.94111	2.608	2.68	2.71032	2.776	2.808	2.82147	2.813	2.875	2.90111	2.785	2.919	2.97542	2.757	2.887	2.94174	2.799
[truncated: 74 more columns]

## Sheet: Cubic_CBS-a34-VEDEs
							CCSD(T)/ CBS-a34 Versus EPT/ CBS-a34
Anions	CCSD(T) VEDE	Final State		KT	D2	PS(D2)	os-D2	PS(os-D2)	nD-D2	PS(nD-D2)	os-nD-D2	PS(os-nD-D2)	D3	PS(D3)	OVGF-A	PS(OVGF-A)	OVGF-B	PS(OVGF-B)	OVGF-C	PS(OVGF-C)	nD-D3	PS(nD-D3)	nD-OVGF-A	PS(nD-OVGF-A)	nD-OVGF-B	PS(nD-OVGF-B)	nD-OVGF-C	PS(nD-OVGF-C)	P3	PS(P3)	P3+	PS(P3+)	Q3	PS(Q3)	Q3+	PS(Q3+)	L3	PS(L3)	L3+A	PS(L3+A)	L3+B	PS(L3+B)	L3+C	PS(L3+C)	nD-L3	PS(nD-L3)	nD-L3+A	PS(nD-L3+A)	nD-L3+B
AlH4–	4.91	2-4 2T2		5.404	5.044		5.251		5.039		5.248		4.99		5.019		5.104		4.931		4.981		5.013		5.098		4.918		4.86		4.873		4.82		4.833		4.949		4.986		4.982		4.984		4.94		4.978		4.973
AlO–	3.45	3-4 2Π		4.678	1.909		2.804		1.824		2.762		7.47		3.932		4.835		4.541		X		X		X		X		4.706		4.02		5.154		4.422		4.907		3.839		4.202		4.126		4.913		3.818		4.19
	2.7	5 2Σ		2.747	2.394		2.629		2.384		2.627		3.143		2.618		2.976		2.978		3.159		2.615		2.985		2.986		2.847		2.771		2.841		2.767		2.91		2.633		2.842		2.839		2.916		2.631		2.846
AlS–	3.45	3-4 2Π		3.806	3.122		3.404		3.098		3.394		3.829		3.396		3.653		3.678		3.829		3.385		3.647		3.673		3.517		3.461		3.491		3.435		3.547		3.362		3.493		3.494		3.539		3.35		3.482
	2.77	5 2Σ		2.799	2.64		2.836		2.636		2.838		2.85		2.675		2.858		2.838		2.854		2.672		2.861		2.839		2.751		2.737		2.675		2.66		2.784		2.681		2.785		2.781		2.784		2.679		2.785
BH4–	4.68	2-4 2T2		5.192	4.584		4.92		4.574		4.915		4.739		4.653		4.754		4.734		4.73		4.643		4.744		4.724		4.623		4.618		4.536		4.533		4.643		4.62		4.651		4.647		4.633		4.609		4.641
BO–	5.77	3-4 2Π		6.854	4.87		5.57		4.818		5.545		7.13		6.043		6.449		6.418		7.139		6.028		6.438		6.408		6.262		6.023		6.392		6.152		6.257		5.824		6.017		5.999		6.242		5.802		5.997
	2.56	5 2Σ		2.975	2.571		2.71		2.562		2.705		2.613		2.585		2.622		2.611		2.604		2.575		2.61		2.599		2.665		2.654		2.534		2.521		2.639		2.605		2.643		2.639		2.629		2.598		2.634
BS–	4.47	3-4 2Π		4.631	4.36		4.514		4.351		4.512		4.639		4.427		4.566		4.598		4.64		4.42		4.565		4.597		4.531		4.512		4.486		4.464		4.529		4.426		4.51		4.513		4.525		4.42		4.507
	2.45	5 2Σ		3.083	2.396		2.715		2.378		2.707		2.573		2.462		2.5		2.544		2.555		2.445		2.479		2.527		2.59		2.56		2.411		2.379		2.52		2.463		2.503		2.51		2.502		2.445		2.485
CH3–	0.41	4 2A1		0.739	0.004		0.132		-0.015		0.117		0.696		0.295		0.456		0.529		0.693		0.282		0.448		0.524		0.597		0.51		0.505		0.42		0.527		0.317		0.441		0.453		0.52		0.306		0.432
Cl–	3.69	2-4 2Tu		4.089	3.268		3.591		3.247		3.583		4.036		3.611		3.883		3.901		4.035		3.601		3.877		3.896		3.715		3.657		3.678		3.619		3.775		3.583		3.725		3.723		3.767		3.572		3.715
CN–	3.95	3 2Σ		5.26	3.617		4.226		3.585		4.211		4.273		3.971		3.893		4.087		4.25		3.915		3.863		4.06		4.287		4.169		4.045		3.928		4.059		3.911		3.944		3.983		4.034		3.885		3.915
	5.12	4-5 2Π		5.224	4.884		5.122		4.871		5.119		5.323		4.985		5.039		5.196		5.325		4.978		5.033		5.197		5.53		5.435		5.405		5.311		5.263		5.031		5.168		5.193		5.264		5.027		5.166
CP–	2.95	3 2Σ		4.385	2.63		3.357		2.582		3.336		3.534		3.008		2.84		3.198		3.508		2.974		2.797		3.163		3.615		3.391		3.237		3.02		3.235		2.993		3.015		3.096		3.202		2.959		2.977
	3.74	4-5 2Π		3.437	3.746		3.748		3.761		3.759		3.641		3.797		3.5		3.669		3.649		3.819		3.503		3.679		4.037		3.996		3.879		3.838		3.787		3.553		3.744		3.778		3.803		3.531		3.758
F–	3.44	2-4 2Tu		4.926	1.393		2.582		1.333		2.553		7.026		4.242		5.08		4.793		7.067		4.231		5.081		4.788		4.465		3.828		4.944		4.273		4.804		3.804		4.143		4.067		4.801		3.787		4.129
HAlCl–	2	6 2A'		1.857	1.895		2.008		1.896		2.012		1.969		1.887		2.087		1.987		1.974		1.887		2.097		1.994		1.865		1.868		1.814		1.819		1.95		1.882		1.978		1.967		1.954		1.882		1.982
HAlP–	3.9	3 2Σ		4.28	3.426		3.85		3.396		3.838		4.451		3.789		4.087		4.141		4.458		3.776		4.079		4.136		4.045		3.921		3.98		3.861		4.031		3.748		3.912		3.92		4.02		3.732		3.9
	2.26	4-5 2Π		2.065	1.882		2.016		1.875		2.015		2.442		1.97		2.25		2.299		2.461		1.968		2.259		2.311		2.263		2.198		2.231		2.168		2.249		1.987		2.187		2.189		2.257		1.984		2.192
HBF–	0.62	6 2A'		0.838	0.411		0.534		0.401		0.527		0.678		0.515		0.697		0.672		0.671		0.506		0.691		0.666		0.582		0.565		0.513		0.497		0.641		0.543		0.641		0.639		0.636		0.534		0.635
HBN–	3.9	3 2Σ		5.833	2.496		3.732		2.423		3.696		6.506		4.184		4.491		4.633		6.525		4.158		4.462		4.607		4.952		4.301		4.85		4.206		4.768		3.933		4.126		4.154		4.744		3.897		4.091
	3.08	4-5 2Π		3.118	2.439		2.752		2.414		2.743		3.716		2.835		3.131		3.263		3.738		2.83		3.13		3.268		3.556		3.338		3.499		3.283		3.339		2.879		3.126		3.142		3.347		2.874		3.125
HCC–	3.11	3 2Σ		4.673	2.728		3.43		2.685		3.407		3.635		3.165		3.142		3.354		3.609		3.133		3.103		3.32		3.518		3.364		3.25		3.099		3.286		3.095		3.137		3.183		3.253		3.061		3.101
	3.47	4-5 2Π		3.417	3.27		3.448		3.265		3.448		3.561		3.302		3.32		3.483		3.567		3.298		3.315		3.484		3.814		3.732		3.646		3.564		3.569		3.338		3.485		3.515		3.574		3.335		3.487
HCO–	0.64	6 2A'		1.228	0.17		0.638		0.146		0.625		1.002		0.557		0.728		0.804		0.996		0.543		0.715		0.791		0.8		0.706		0.709		0.614		0.747		0.539		0.656		0.666		0.734		0.523		0.639
HNB–	4.19	3-4 2Π		4.897	3.59		4.095		3.553		4.076		4.926		4.197		4.452		4.522		4.927		4.182		4.44		4.512		4.25		4.433		4.499		4.34		4.428		4.119		4.268		4.274		4.413		4.099		4.249
	1.88	5 2Σ		2.421	1.834		2.02		1.82		2.011		2.003		1.9		1.981		1.987		1.99		1.886		1.967		1.972		0.875		0.993		1.852		1.834		1.956		1.903		1.951		1.951		1.943		1.889		1.937
HNF–	4.27	6 2A'		5.405	3.313		4.198		3.268		4.177		5.195		4.291		4.593		4.643		5.189		4.271		4.575		4.626		4.522		4.316		4.51		4.304		4.507		4.137		4.3		4.304		4.488		4.112		4.275
	1.27	7 2A''		2.494	0.59		1.249		0.548		1.228		1.885		1.263		1.406		1.523		1.871		1.24		1.38		1.5		1.578		1.415		1.456		1.294		1.463		1.193		1.302		1.32		1.44		1.165		1.274
HOO–	2.15	6 2A'		3.968	0.976		2.09		0.914		2.062		3.565		2.35		2.626		2.697		3.557		2.324		2.6		2.672		2.654		2.333		2.639		2.314		2.574		2.098		2.254		2.259		2.546		2.065		2.22
	1.58	7 2A''		3.276	0.25		1.375		0.187		1.348		2.948		1.689		1.999		2.044		2.942		1.665		1.974		2.02		1.949		1.627		1.971		1.648		1.893		1.407		1.57		1.569		1.864		1.405		1.536
HPAl–	2.44	4 2A''		2.468	2.311		2.408		2.305		2.406		2.536		2.345		2.48		2.505		2.539		2.342		2.479		2.508		2.472		2.45		2.397		2.377		2.465		2.354		2.449		2.451		2.465		2.35		2.448
	2.22	5 2A'		2.245	2.086		2.285		2.081		2.286		2.267		2.115		2.264		2.253		2.267		2.11		2.267		2.254		2.198		2.183		2.108		2.093		2.212		2.122		2.212		2.21		2.211		2.117		2.209
HPCl–	4.69	6 2A'		5.181	4.456		4.872		4.438		4.866		4.872		4.624		4.801		4.816		4.863		4.611		4.789		4.805		4.666		4.639		4.578		4.55		4.695		4.595		4.679		4.68		4.681		4.579		4.664
	1.7	7 2A''		1.836	1.514		1.717		1.505		1.714		1.77		1.582		1.731		1.741		1.767		1.576		1.727		1.737		1.676		1.654		1.582		1.56		1.696		1.592		1.687		1.687		1.691		1.586		1.681
HSiS–	4.06	5 2A"		4.21	3.832		4.012		3.82		4.006		4.239		3.948		4.133		4.166		4.241		3.941		4.129		4.165		4.073		4.041		4.027		3.995		4.079		3.942		4.051		4.053		4.074		3.935		4.044
	2.42	6 2A'		2.574	2.167		2.478		2.156		2.476		2.517		2.272		2.463		2.471		2.515		2.265		2.458		2.467		2.351		2.326		2.271		2.245		2.381		2.267		2.369		2.369		2.376		2.259		2.362
HSiSi–	2.44	4 2A"		2.079	2.283		2.329		2.293		2.338		2.313		2.27		2.238		2.307		2.326		2.277		2.246		2.319		2.456		2.429		2.329		2.304		2.362		2.192		2.339		2.353		2.376		2.191		2.353
	2.4	5 2A'		2.005	2.304		2.31		2.319		2.321		2.287		2.307		2.224		2.289		2.303		2.321		2.236		2.305		2.457		2.434		2.334		2.313		2.361		1.981		2.341		2.353		2.38		1.914		2.359
HSS–	2.88	6 2A'		3.298	2.518		2.901		2.496		2.891		3.153		2.771		2.989		3.026		3.148		2.759		2.979		3.018		2.883		2.827		2.813		2.759		2.903		2.74		2.856		2.86		2.891		2.726		2.843
	2.14	7 2A''		2.432	1.767		2.132		1.749		2.124		2.338		1.981		2.2		2.233		2.337		1.972		2.19		2.227		2.097		2.049		2.026		1.978		2.121		1.96		2.081		2.083		2.111		1.949		2.068
NH2–	0.75	4 2B1		1.358	-0.172		0.24		-0.215		0.217		1.798		0.747		1.084		1.132		1.81		0.735		1.076		1.125		1.215		0.953		1.225		0.961		1.145		0.683		0.882		0.884		1.138		0.665		0.868
OCl–	2.55	6-7 2Π		3.87	1.76		2.618		1.711		2.596		3.699		2.737		3.034		3.096		3.695		2.717		3.015		3.078		2.989		2.764		2.965		2.743		2.954		2.568		2.731		2.735		2.932		2.54		2.704
OF–	2.7	6-7 2Π		4.687	1.727		2.828		1.673		2.805		3.781		2.869		3.036		3.153		3.764		2.842		3.007		3.126		3.164		2.912		3.065		2.816		3.037		2.671		2.786		2.803		3.007		2.638		2.753
OH–	1.84	3-4 2π		2.976	0.174		1.081		0.111		1.048		4.733		2.259		2.935		2.798		4.779		2.245		2.931		2.79		2.815		2.219		3.085		2.469		2.931		2.015		2.327		2.281		2.931		1.995		2.311
PH2–	1.26	4 2B1		1.239	1.1		1.147		1.097		1.145		1.298		1.132		1.286		1.284		1.301		1.131		1.288		1.286		1.236		1.22		1.157		1.142		1.262		1.148		1.259		1.257		1.263		1.147		1.258
SCl–	2.8	6-7 2Π		3.211	2.47		2.856		2.451		2.849		2.994		2.679		2.867		2.903		2.988		2.666		2.854		2.893		2.787		2.741		2.694		2.65		2.802		2.66		2.765		2.771		2.79		2.647		2.754
SF–	2.57	6-7 2Π		2.975	2.302		2.63		2.287		2.623		2.763		2.492		2.673		2.698		2.758		2.481		2.663		2.691		2.612		2.574		2.52		2.482		2.638		2.499		2.61		2.613		2.629		2.488		2.599
SH–	2.36	3-4 2Π		2.586	2.031		2.258		2.016		2.251		2.59		2.238		2.476		2.498		2.59		2.23		2.471		2.495		2.38		2.332		2.316		2.27		2.414		2.24		2.376		2.378		2.408		2.233		2.369
SiH3–	1.87	4 2A'		1.838	1.755		1.847		1.752		1.848		1.866		1.765		1.937		1.876		1.866		1.763		1.941		1.877		1.768		1.766		1.702		1.7		1.837		1.77		1.855		1.846		1.836		1.769		1.855
SiN–	3.06	3 2Σ		2.907	2.196		2.48		2.155		2.46		4.449		2.707		3.097		3.284		4.529		2.699		3.104		3.301		4.042		3.526		4.054		3.536		3.621		2.785		3.148		3.164		3.656		2.78		3.16
	3.26	4-5 2Π		4.215	2.163		3.023		2.095		2.993		5.856		3.294		3.487		3.781		5.926		3.273		3.461		3.765		4.646		3.847		4.471		3.693		4.277		3.29		3.513		3.571		4.279		3.268		3.494
SiP–	3.15	3 2Σ		3.574	3		3.36		2.979		3.354		3.435		3.13		3.187		3.316		3.429		3.117		3.172		3.306		3.429		3.349		3.259		3.179		3.299		3.14		3.224		3.249		3.289		3.127		3.211
	3.1	4-5 2Π		2.636	2.813		2.836		2.821		2.844		2.954		2.769		2.832		2.92		2.971		2.775		2.841		2.936		3.052		3.017		2.972		2.936		2.951		2.698		2.914		2.926		2.966		2.695		2.926
	Statistics for signed deviations from CCST(T) All 55 VEDEs.			KT	D2	os-D2	nD-D2	os-nD-D2	D3	OVGF-A	OVGF-B	OVGF-C	nD-D3	nD-OVGF-A	nD-OVGF-B	nD-OVGF-C	P3	P3+	Q3	Q3+	L3	L3+A	L3+B	L3+C	nD-L3	nD-L3+A	nD-L3+B	nD-L3+C	DR	RP3	RQ3	RL3	nD-RL3	ND2	2ph-TDA	3+	NR2	BD-T1	ADC(3)	NRP3	NRQ3	NRL3
				0.525618	-0.476927	-0.0599273	-0.501382	-0.0706364	0.618273	-0.0153455	0.181127	0.224582	0.558611	-0.0357222	0.15	0.201685	0.232636	0.0924909	0.1984	0.0487455	0.208891	-0.0753818	0.0666364	0.0720727	0.202127	-0.0897818	0.0559636	0.0615273	0.207727	-0.00136364	-0.0844364	-0.0358364	-0.0494364	-0.417	-0.525109	0.200182	-0.0561455	0.0354364	0.148182	-0.0549912	-0.107299	-0.0511224
				0.625764	0.466295	0.250538	0.486813	0.255659	0.911064	0.193199	0.344607	0.290225	0.809316	0.19014	0.308808	0.269157	0.401421	0.228526	0.432776	0.243438	0.347815	0.149243	0.16983	0.15883	0.340736	0.135355	0.158736	0.144908	0.219993	0.186873	0.16016	0.087564	0.0835183	0.453497	0.244055	0.320497	0.139991	0.0894721	0.241365	0.149182	0.148381	0.0939227
	Statistics for absolute deviations from CCST(T) All 55 VEDEs.			KT	D2	os-D2	nD-D2	os-nD-D2	D3	OVGF-A	OVGF-B	OVGF-C	nD-D3	nD-OVGF-A	nD-OVGF-B	nD-OVGF-C	P3	P3+	Q3	Q3+	L3	L3+A	L3+B	L3+C	nD-L3	nD-L3+A	nD-L3+B	nD-L3+C	DR	RP3	RQ3	RL3	nD-RL3	ND2	2ph-TDA	3+	NR2	BD-T1	ADC(3)	NRP3	NRQ3	NRL3
				0.602709	0.482418	0.173818	0.506909	0.178673	0.637182	0.136945	0.228182	0.243055	0.575685	0.137352	0.205556	0.218241	0.293473	0.165836	0.281309	0.160455	0.225873	0.128582	0.0966	0.100291	0.218782	0.127382	0.0857091	0.0885455	0.265	0.133473	0.162909	0.0794	0.0843091	0.516782	0.525109	0.224255	0.124836	0.0617273	0.199709	0.129491	0.164215	0.0837533
				1.987	2.047	0.858	2.107	0.887	4.02	0.802	1.64	1.353	3.627	0.791	1.641	1.348	1.586	0.887	1.704	0.972	1.457	0.475	0.752	0.676	1.463	0.486	0.74	0.66	0.701	0.867	0.424	0.259	0.232	2.366	1.126	1.392	0.551	0.346	0.813	0.559486	0.429703	0.333108
[truncated: 109 more columns]

[truncated: 1 more sheets: Cubic_CBS-a34-VEDEs_Extrapolat]
